# Supplementary material for: Impact of renin–angiotensin–aldosterone system inhibition on mortality in critically ill COVID-19 patients with pre-existing hypertension: a prospective cohort study
Source: Springer Nature journal article supplement (doi:10.1186/s12872-022-02565-1), 2022-03-23
Supplement: 12872_2022_2565_MOESM1_ESM.pdf [file 12872_2022_2565_MOESM1_ESM.pdf]

# SUPPLEMENTAL MATERIAL

## (Additional File 1)

**Document S1:** The rationale and design of the COVID-19-CCC/ECMOCARD registry (Protocol)

**Document S2:** Participating sites

**Document S3:** Case report form regarding demographics, comorbidities, medications, laboratory values, complications, and outcomes

**Document S4:** Additional case report form regarding mechanical ventilation and ExtraCorporeal Membrane Oxygenation

**Document S1.** The rationale and design of the COVID-19-CCC/ECMOCARD registry (Protocol)

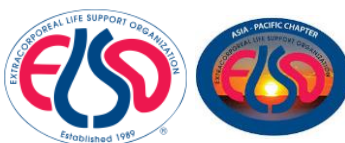

# Covid-19 Critical Care Consortium Observational Study

*Incorporating the  
ExtraCorporeal Membrane Oxygenation for 2019 novel Coronavirus  
Acute Respiratory Disease*

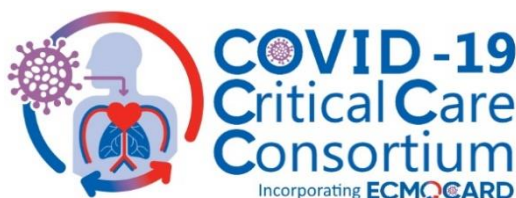

**v. 1.2.8**

## Chief Investigators:

|                                                                                                                                                                                                                                                                                                                                                                                                                                                                                                                                                                                                                                                                                                                                                  |                                                                                                                                                                                                                                                                                                                                                                                                                                                                                                                                                                                                                                                                                                                                                               |
|--------------------------------------------------------------------------------------------------------------------------------------------------------------------------------------------------------------------------------------------------------------------------------------------------------------------------------------------------------------------------------------------------------------------------------------------------------------------------------------------------------------------------------------------------------------------------------------------------------------------------------------------------------------------------------------------------------------------------------------------------|---------------------------------------------------------------------------------------------------------------------------------------------------------------------------------------------------------------------------------------------------------------------------------------------------------------------------------------------------------------------------------------------------------------------------------------------------------------------------------------------------------------------------------------------------------------------------------------------------------------------------------------------------------------------------------------------------------------------------------------------------------------|
| <p><b>A/Prof Gianluigi LI BASSI</b><br/>University of Queensland<br/>Level 3   Clinical Sciences Building<br/>Chermside Qld 4032<br/>Australia<br/>T: +61 7 3139 6880<br/>Mobile: +61 0421273217<br/>Email: <a href="mailto:g.libassi@uq.edu.au">g.libassi@uq.edu.au</a></p> <p><b>Dr. Jacky SUEN</b><br/>University of Queensland<br/>Level 3   Clinical Sciences Building<br/>Chermside Qld 4032<br/>Australia<br/>T: +61 7 3139 6880<br/>Mobile: +61 400128961<br/>Email: <a href="mailto:j.suen1@uq.edu.au">j.suen1@uq.edu.au</a></p> <p><b>Prof. John Fraser</b><br/>President Elect Asian-Pacific Extracorporeal Life Support<br/>University of Queensland<br/>Level 3   Clinical Sciences Building<br/>Chermside Qld 4032 – Australia</p> | <p><b>Prof Heidi Dalton</b><br/>Inova Fairfax Hospital<br/>3300 Gallows Rd<br/>Falls Church, VA 22042-3307<br/>United States<br/>T: +1 703-776-6041<br/>Email: <a href="mailto:heidi.dalton26@gmail.com">heidi.dalton26@gmail.com</a></p> <p><b>Prof Adrian BARNETT</b><br/>Queensland University of Technology<br/>Faculty of Health,<br/>School - Public Health and Social Work,<br/>Research - Public Health<br/>T: +61 7 3138 6010<br/>Email: <a href="mailto:a.barnett@qut.edu.au">a.barnett@qut.edu.au</a></p> <p><b>Dr Sally SHRAPNEL</b><br/>University of Queensland<br/>School of Mathematics and Physics<br/>Faculty of Science<br/>Australia<br/>T: +61 7 336 56931<br/>Email: <a href="mailto:s.shrapnel@uq.edu.au">s.shrapnel@uq.edu.au</a></p> |
|--------------------------------------------------------------------------------------------------------------------------------------------------------------------------------------------------------------------------------------------------------------------------------------------------------------------------------------------------------------------------------------------------------------------------------------------------------------------------------------------------------------------------------------------------------------------------------------------------------------------------------------------------------------------------------------------------------------------------------------------------|---------------------------------------------------------------------------------------------------------------------------------------------------------------------------------------------------------------------------------------------------------------------------------------------------------------------------------------------------------------------------------------------------------------------------------------------------------------------------------------------------------------------------------------------------------------------------------------------------------------------------------------------------------------------------------------------------------------------------------------------------------------|

**ECMOCARD Research Coordinator:**

**Research Program Support Team**

Critical Care Research Group  
Level 3 | Clinical Sciences Building  
The Prince Charles Hospital  
Chermside Qld 4032  
Australia  
Email: [ecmocard@health.qld.gov.au](mailto:ecmocard@health.qld.gov.au)

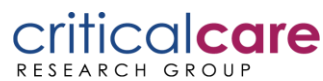

**ECMOCARD Coordinating Centres:**

Extracorporeal Life Support Organisation And Asia-Pacific Life Support Organisation

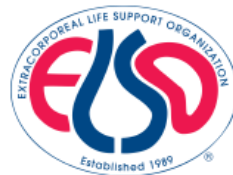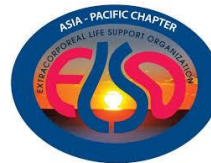

Critical Care Research Group  
Level 3 | Clinical Sciences Building  
The Prince Charles Hospital  
Chermside Qld 4032  
Australia  
Email: [ecmocard@health.qld.gov.au](mailto:ecmocard@health.qld.gov.au)

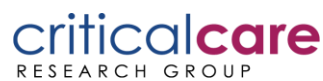

## COVID-19 Critical Care Consortium Steering Committee

**President: Robert Bartlett**, Department of Surgery, University of Michigan, Ann Arbor, MI, USA.

### Committee:

1. **Aidan Burrell**, Australian and New Zealand Intensive Care Research Centre/ The Alfred Hospital/Monash University, Melbourne, Australia.
2. **Daniel Brodie**, Columbia University College of Physicians and Surgeons/New York-Presbyterian Hospital, New York, USA
3. **Davide Chiumello**, San Paolo Hospital and University of Milan, Milan, Italy
4. **Heidi Dalton**, INOVA Fairfax Hospital, Falls Church, Virginia, USA
5. **John Fraser**, Critical Care Research Group, The Prince Charles Hospital, Chermide, Australia
6. **Alyaa Elhazmi**, King Faisal Specialist Hospital and Research Centre, Riyadh, Saudi Arabia
7. **Carol Hodgson**, Australian and New Zealand Intensive Care Research Centre/ The Alfred Hospital/Monash University, Melbourne, Australia.
8. **Trieu Huynh**, Hospital for Tropical Diseases, 764 Vo Van Kiet, Ho Chi Minh City, Vietnam
9. **Shingo Ichiba**, Department of Surgical Intensive Care Medicine, Nippon Medical School Hospital.
10. **John Laffey**, Regenerative Medicine Institute (REMEDI) at CÚRAM Centre for Research in Medical Devices, Biomedical Sciences Building, National University of Ireland Galway, Galway, Ireland; Department of Anaesthesia and Intensive Care Medicine, Galway University Hospitals, and School of Medicine, Clinical Sciences Institute, National University of Ireland, Galway, Ireland
11. **Gianluigi Li Bassi**, Critical Care Research Group, The Prince Charles Hospital, Chermide, Australia
12. **Carlos Luna**, Department of Medicine, Pulmonary Diseases Division, Hospital de Clínicas, Universidad de Buenos Aires, Buenos Aires, Argentina.
13. **Srinivas Murthy**, BC Children's Hospital, Department of Pediatrics, University of British Columbia, Vancouver, Canada.
14. **Alistair Nichol**, Critical Care Medicine in University College Dublin, Director of the Irish Critical Care Clinical Trails Network, Consultant in St Vincent's University Hospital, Dublin
15. **Jacky Suen**, Critical Care Research Group, The Prince Charles Hospital, Chermide, Australia
16. **Mark Ogino**, Department of Paediatrics, Division of Neonatology, Nemours Alfred I duPont Hospital for Children, Wilmington, DE, USA; Sidney Kimmel Medical College, Thomas Jefferson University, Philadelphia, PA, USA.
17. **Antoni Torres**, Hospital Clinic and University of Barcelona, Barcelona, Spain

18. **Antonio Pesenti**, Fondazione IRCCS Ca' Granda Ospedale Maggiore Policlinico, Dept of Pathophysiology and Transplantation University of Milan, Milano Italy.
19. **Pauline Yeung**, Division of Respiratory and Critical Care Medicine, Department of Medicine, The University of Hong Kong/ L345, Adult Intensive Care Unit, Queen Mary Hospital, 102 Pokfulam Road, Hong Kong.
20. **Eddy Fan**, Interdepartmental Division of Critical Care Medicine, and Institute of Health Policy Management and Evaluation University of Toronto, Canada

## Summary

|                                 |                                                                                                                                                                                                                                                                                                                                                                                                                                                                                                                                      |
|---------------------------------|--------------------------------------------------------------------------------------------------------------------------------------------------------------------------------------------------------------------------------------------------------------------------------------------------------------------------------------------------------------------------------------------------------------------------------------------------------------------------------------------------------------------------------------|
| <b>Scientific Title</b>         | <b>Covid-19 Critical Care Consortium</b><br><b>Incorporating the</b><br>ExtraCorporeal Membrane Oxygenation for 2019 novel Coronavirus Acute Respiratory Disease (ECMOCARD)                                                                                                                                                                                                                                                                                                                                                          |
| <b>Study Design</b>             | Prospective/Retrospective multi-centre short period incidence observational study of patients in participating hospitals and intensive care units (ICUs) with 2019 novel coronavirus (COVID-19).                                                                                                                                                                                                                                                                                                                                     |
| <b>The Collaborative</b>        | <b>In response to the COVID-19 outbreak and to assist in pandemic planning both locally and globally, a research collaborative has been assembled.</b> The collaborative consists of investigators from the Asia-Pacific extracorporeal life support organization (APELSO) in collaboration with centres within the SPRINT-SARI and ISARIC Network. In Australia, this study will be also complemented through collaboration with the “National registry on the treatment and outcomes of patients requiring ECMO” (EXCEL Registry). |
| <b>Study Aim and Objectives</b> | To describe clinical features; severity of pulmonary dysfunction; incidence of ICU admission, coagulatory and thrombotic derangement, cardiac dysfunction, neurological impact, kidney injury, use of mechanical ventilation, ECMO technical characteristics; duration of ECMO; complications; and survival of patients with COVID-19.                                                                                                                                                                                               |
| <b>Inclusions/Exclusions</b>    | All patients admitted to ICU with clinical suspicion or laboratory confirmed COVID-19 infection by real-time PCR and/or next-generation sequencing will be included.                                                                                                                                                                                                                                                                                                                                                                 |

|                                  |                                                                                                                                                                                                                                                                                                                                                                                                                                                                                                                                                                                                                                                                                                                                                                                                                                                                                                                                                                                                                                                                                                                                                                                                                       |
|----------------------------------|-----------------------------------------------------------------------------------------------------------------------------------------------------------------------------------------------------------------------------------------------------------------------------------------------------------------------------------------------------------------------------------------------------------------------------------------------------------------------------------------------------------------------------------------------------------------------------------------------------------------------------------------------------------------------------------------------------------------------------------------------------------------------------------------------------------------------------------------------------------------------------------------------------------------------------------------------------------------------------------------------------------------------------------------------------------------------------------------------------------------------------------------------------------------------------------------------------------------------|
|                                  | Patients receiving mechanical ventilation or ECMO for other concomitant causes will be excluded.                                                                                                                                                                                                                                                                                                                                                                                                                                                                                                                                                                                                                                                                                                                                                                                                                                                                                                                                                                                                                                                                                                                      |
| <b>Consent</b>                   | Given the negligible risk associated with this study and the timely nature in which the data needs to be collected, a waiver of consent is sought.                                                                                                                                                                                                                                                                                                                                                                                                                                                                                                                                                                                                                                                                                                                                                                                                                                                                                                                                                                                                                                                                    |
| <b>Study Setting</b>             | International multi-centre study, conducted in all collaborating hospitals/ICU-based research networks globally.                                                                                                                                                                                                                                                                                                                                                                                                                                                                                                                                                                                                                                                                                                                                                                                                                                                                                                                                                                                                                                                                                                      |
| <b>Sample Size</b>               | All patients with confirmed COVID-19 infection admitted to ICUs at the collaborative centres                                                                                                                                                                                                                                                                                                                                                                                                                                                                                                                                                                                                                                                                                                                                                                                                                                                                                                                                                                                                                                                                                                                          |
| <b>Study Start Date</b>          | From the commencement of COVID-19 global epidemic                                                                                                                                                                                                                                                                                                                                                                                                                                                                                                                                                                                                                                                                                                                                                                                                                                                                                                                                                                                                                                                                                                                                                                     |
| <b>Study Duration</b>            | Until completion of COVID-19 global epidemic, as judged by the World Health Organization                                                                                                                                                                                                                                                                                                                                                                                                                                                                                                                                                                                                                                                                                                                                                                                                                                                                                                                                                                                                                                                                                                                              |
| <b>Data collection processes</b> | Patients will be studied from time of ICU admission until hospital discharge or up to 28 days post ICU admission, whichever occurs later. All clinical information will only be recorded if taken as part of routine clinical practice at each site. Only de-identifiable data will be submitted centrally (REDCap hosted at Oxford University for International centres and at Monash University for Australian centres). A specific Case Report Form (CRF) will be used by participating sites to collect data set of ICU, mechanical ventilation and ECMO data. An optional Basic CRF will also be available for sources with limited resources for data collection. Data for COVID-19 Critical Care Consortium and ISARIC/SPRINT SARI observational studies will be concomitantly collected. Data will be recorded into REDcap through standard data collection or interactive augmented human experience via digital interaction by voice or touch monitors or digital transcription of CRF hard copies. In Australia, patients concomitantly included into the EXCEL registry, EXCEL data will be requested to complement COVID-19 Critical Care Consortium observational study data and reduce daily workload. |

## Table of contents

|                                                                                              |                                     |
|----------------------------------------------------------------------------------------------|-------------------------------------|
| <b>COVID-19 CRITICAL CARE CONSORTIUM STEERING COMMITTEE .....</b>                            | <b>ERROR! BOOKMARK NOT DEFINED.</b> |
| <b>SUMMARY .....</b>                                                                         | <b>4</b>                            |
| <b>TABLE OF CONTENTS .....</b>                                                               | <b>6</b>                            |
| <b>INTRODUCTION .....</b>                                                                    | <b>8</b>                            |
| INTERNATIONAL SEVERE ACUTE RESPIRATORY AND EMERGING INFECTION CONSORTIUM (ISARIC).....       | 8                                   |
| SHORT PERIOD INCIDENCE STUDY OF SEVERE ACUTE RESPIRATORY INFECTION (SPRINT-SARI).....        | 9                                   |
| CORONAVIRUSES.....                                                                           | 10                                  |
| 2019 NOVEL CORONAVIRUS (COVID-19).....                                                       | 10                                  |
| <b>OBJECTIVES.....</b>                                                                       | <b>14</b>                           |
| HYPOTHESIS.....                                                                              | 14                                  |
| AIMS.....                                                                                    | 14                                  |
| <b>MATERIALS AND METHODS.....</b>                                                            | <b>14</b>                           |
| STUDY DESIGN .....                                                                           | 14                                  |
| RESEARCH CENTRES .....                                                                       | 15                                  |
| STUDY POPULATION .....                                                                       | 15                                  |
| <i>Inclusion Criteria</i> .....                                                              | 15                                  |
| <i>Exclusion Criteria</i> .....                                                              | 15                                  |
| <i>Co-enrolment</i> .....                                                                    | 16                                  |
| <b>ETHICS .....</b>                                                                          | <b>16</b>                           |
| GUIDING PRINCIPLES .....                                                                     | 16                                  |
| COMPLY WITH ALL LOCAL REQUIREMENTS .....                                                     | 16                                  |
| <b>CONFIDENTIALITY OF PATIENT DATA.....</b>                                                  | <b>17</b>                           |
| RULE OF TRANSFER .....                                                                       | 17                                  |
| INTERNATIONAL WAIVER OF INFORMED CONSENT .....                                               | 18                                  |
| INFORMED CONSENT IN AUSTRALIA .....                                                          | 18                                  |
| <b>DATA COLLECTION.....</b>                                                                  | <b>18</b>                           |
| ISARIC DATA COLLECTION .....                                                                 | 18                                  |
| COVID-19 CRITICAL CARE CONSORTIUM OBSERVATIONAL STUDY DATA COLLECTION .....                  | 19                                  |
| COVID-19 CRITICAL CARE CONSORTIUM OBSERVATIONAL STUDY BASIC DATA COLLECTION (OPTIONAL) ..... | 20                                  |
| COAGULATION DISORDERS AND THROMBOSIS SUB-STUDY DATA COLLECTION (OPTIONAL) .....              | 22                                  |
| NEUROLOGY SUB-STUDY DATA COLLECTION (OPTIONAL) .....                                         | 23                                  |
| CARDIAC SUB-STUDY DATA COLLECTION (OPTIONAL) .....                                           | 23                                  |
| ACUTE KIDNEY INJURY SUB-STUDY DATA COLLECTION (OPTIONAL) .....                               | 24                                  |
| SCREENING LOG.....                                                                           | 30                                  |
| DATA QUALITY.....                                                                            | 30                                  |
| DATA MANAGEMENT .....                                                                        | 31                                  |
| MONITORING.....                                                                              | 32                                  |
| COLLECTED PARAMETERS .....                                                                   | 32                                  |
| <i>Demographics and Medical History</i> .....                                                | 32                                  |
| <i>COVID-19 infection</i> .....                                                              | 32                                  |
| <i>Clinical parameters upon commencement of invasive mechanical ventilation</i> .....        | 33                                  |
| <i>Daily assessment of clinical parameters during invasive mechanical ventilation</i> .....  | 33                                  |
| <i>Clinical features before commencement of ECMO</i> .....                                   | 34                                  |



*ECMO characteristics* ..... 35  
*ECMO adverse effects* ..... 35  
*Daily assessments for Coagulation Disorders and Thrombosis Sub-study* ..... 35  
*Main outcomes*..... 36  
*Sub-studies* ..... 36

**DATA ANALYSIS** ..... 38

**REFERENCE LIST** ..... 39

**REGULATION, ETHICS AND GOVERNANCE** ..... 42

CONFLICT OF INTEREST ..... 42  
DATA COLLECTION AND SITE MONITORING PLAN ..... 42  
*Data Collection* ..... 42  
*Site Monitoring*..... 42  
*Compensations*..... 43  
DATA ACCESS..... 43

**FEASIBILITY** ..... 43

**DISSEMINATION AND PUBLICATION** ..... 43

PUBLICATION POLICY ..... 43  
AUTHORSHIP POLICY ..... 44

## Introduction

The ExtraCorporeal Membrane Oxygenation for 2019 novel Coronavirus Acute Respiratory Disease (ECMOCARD Trial) will be carried out within the network and web-based case collection forms of the ISARIC consortium's SPRINT-SARI study and in Australian and New Zealand centres, upon conclusion of the epidemics, potentially complemented through the study "A comprehensive national registry on the treatment and outcomes of patients requiring ECMO" (EXCEL Registry).

### International Severe Acute Respiratory and Emerging Infection Consortium (ISARIC)

The International Severe Acute Respiratory and Emerging Infection Consortium (ISARIC) was formed in 2011, in response to global recognition of the unmet need for timely and effective clinical research during outbreaks of emerging infectious disease with epidemic or pandemic potential. ISARIC represents a new paradigm for effective, coordinated, and timely collaborative clinical research during rapidly emerging threats to public health. It is collaboration among clinicians, clinical researchers, epidemiologists, ethicists, statisticians, laboratory-based clinicians, basic scientists, and public health experts. The mission of ISARIC is to develop operational readiness and to co-ordinate the conduct of essential clinical research to characterise and respond to new epidemic or pandemic infectious disease threats, thereby informing and guiding evidence-based optimal management. ISARIC is facilitating the coordination of SPRINT-SARI, which supports ISARIC's goal of improving the effectiveness of clinical researching globally during a pandemic by:

1. Establishing protocols, with standardised definitions and study methods, for conducting time-critical research during outbreaks of emerging infectious diseases;
2. Coordinating a large number of globally diversified hospitals and/or ICU-based networks with pre-existing ethics, administrative, regulatory and logistics in place, sufficient to implement study protocols, especially including regions where this type of clinical research has traditionally not been performed;
3. Identifying and solving barriers to pandemic research, including those identified in SPRINT-SARI;
4. Studying SARI globally, providing evidence on SARI microbiology, treatment and outcome in both resource-rich and resource-poor settings;
5. Allowing ISARIC to evaluate its research capacity and capabilities; and

6. Assisting ISARIC to maintain network stakeholders during inter-pandemic periods.

### Short PeRIod IncideNce sTudy of Severe Acute Respiratory Infection (SPRINT-SARI)

Severe acute respiratory infection (SARI) continues to be of major relevance to public health worldwide. In the last 10 years there have been multiple SARI outbreaks around the world. The 2009 H1N1 pandemic was estimated to result in more than 200,000 respiratory deaths globally<sup>1-3</sup>. The World Health Organization (WHO) defines SARI as an acute respiratory infection of recent onset (within 10 days) requiring hospitalisation, manifested by fever ( $\geq 38^{\circ}\text{C}$ ) or a history of fever and cough<sup>4-6</sup>. There is international consensus that it is important to undertake observational studies of patients with SARI as an essential component of pandemic and epidemic research preparedness. The primary aim of the SPRINT-SARI study was to establish a research response capability for future epidemics / pandemics through a global SARI observational study. The secondary aim of this study was to describe the clinical epidemiology and microbiology profiles of patients with SARI. The tertiary aim of this study was to assess the Ethics, Administrative, Regulatory and Logistic (EARL) barriers to conducting pandemic research on a global level. SPRINT-SARI was designed as a multi-centre, prospective, short period incidence observational study of patients in participating hospitals and intensive care units (ICUs) with SARI. The study period was planned to occur, in both Northern and Southern hemispheric winters. The study period comprised a 5 to 7-day cohort study in which patients meeting a SARI case-definition, who are newly admitted to the hospitals/ICUs at participating sites, will be included in the study. The study was planned to be conducted in 20 to 40-hospital/ ICU-based research networks globally. All clinical information and sample data were planned to only be recorded if taken as part of the routine clinical practice at each site and only fully anonymised and re-identifiable data will be submitted centrally. The primary outcome of SPRINT-SARI was to test the feasibility of conducting a global study of SARI.

#### Secondary Outcomes:

1. Incidence of SARI
2. Disease severity and risk factors for severe disease due to SARI
3. Case Fatality Proportion of SARI
4. Duration of ICU/hospital stay due to SARI
5. Microbiology of SARI, including variability in testing

6. Treatments received during hospitalization for SARI
7. Evaluate impact on incidence of alternative case-definitions of SARI
8. Evaluate the operational characteristics of this study, including CRF, Completion Guidelines, and entry criteria to provide information by which iterative improvement in study design can be achieved.
9. Explore the feasibility of extrapolation of results obtained at participating sites to population levels

## Coronaviruses

Coronaviruses are a family of enveloped, single-stranded, positive-strand RNA viruses classified within the Nidovirales. Coronaviruses may infect mammals and birds, triggering respiratory, enteric, hepatic, and neurologic diseases<sup>7</sup>. Six coronavirus species are known to cause human disease. The coronaviruses 229E, OC43, NL63, and HKU1 are prevalent worldwide and most commonly cause only marginal respiratory symptoms. Two other strains, the severe acute respiratory syndrome coronavirus (SARS-CoV) and Middle East respiratory syndrome coronavirus (MERS-CoV) have originated from animal to human transmission and have caused more serious, sometimes fatal, respiratory illnesses. In previous years, SARS-CoV<sup>8,9</sup> and MERS-CoV<sup>10,11</sup>, have caused serious respiratory infections, with mortality rates of 10% for SARS-CoV<sup>12</sup> and 37% for MERS-CoV<sup>13</sup>.

## 2019 Novel Coronavirus (COVID-19)

In late December, 2019, in Wuhan, Hubei, China, a new respiratory syndrome emerged with clinical signs resembling viral pneumonia and person-to-person transmission<sup>14</sup>. Prompt diagnostic methods, through deep sequencing analysis from lower respiratory tract samples, corroborated emergence of a novel coronavirus, namely the 2019 novel coronavirus (COVID-19). In particular, Na Zhu and collaborators<sup>15</sup> were able to isolate the virus from bronchoalveolar lavage (BAL) from patients with pneumonia of unknown cause, who were in Wuhan on December 21, 2019 or later, and who had been present at the Huanan Seafood Market. RNA extracted from BAL fluid from the patients was used as a template to clone and sequence a genome using a combination of Illumina sequencing and nanopore sequencing. More than 20,000 viral reads from individual specimens were obtained, and most contigs matched to the genome from lineage B of the genus betacoronavirus —

showing more than 85% identity with a bat SARS-like CoV (bat-SL-CoVZC45, MG772933.1) genome. Virus isolation from the clinical specimens was performed with human airway epithelial cells and Vero E6 and Huh-7 cell lines. 2019-nCoV–infected human airway epithelial cultures were examined with light microscopy and with transmission electron microscopy 6 days after inoculation. Cytopathic effects were observed 96 hours after inoculation on surface layers of human airway epithelial cells and lack of cilium beating was seen with light microscopy (Fig. 1).

**Figure 1**

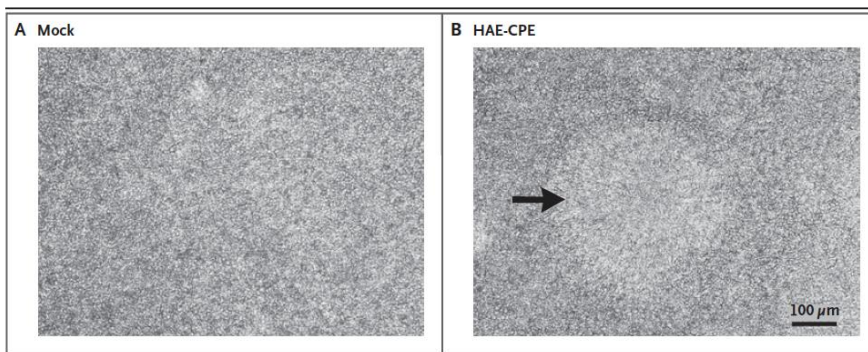

Figure 1: Cytopathic effect of the novel coronavirus, as reported in previous publication<sup>15</sup>

Through transmission electron microscopy, the authors were able to image the COVID-19 particles, that generally appeared spherical, of 60 to 140 nm, with some pleomorphism and distinctive spikes, about 9 to 12 nm (Fig. 3), and gave virions the appearance of a solar corona. This morphology corroborated the Coronaviridae family.

**Figure 2**

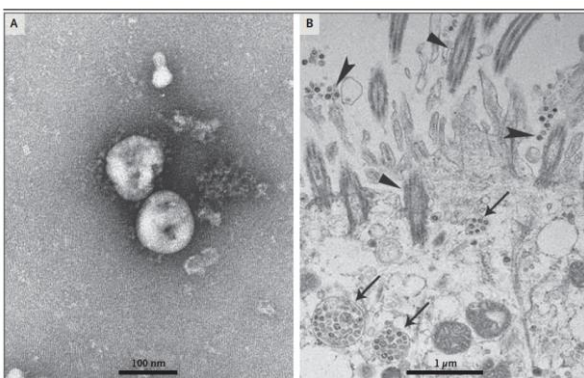

Figure 2: A: COVID-19 particles are depicted. B: COVID-19 in human airway epithelium, as reported in previous publication<sup>15</sup>.

Finally, investigators carried out inclusive phylogenetic analysis that showed that COVID-19 falls into the genus betacoronavirus, which includes coronaviruses as SARS-CoV, bat SARS-like CoV, and others from humans, bats, and other wild animals.

Thus far, more than 111,000 confirmed cases, including health-care workers, have been identified worldwide, and several exported cases have been confirmed in other provinces in China, Thailand<sup>16</sup>, Japan<sup>17</sup>, South Korea<sup>18</sup>, Germany, Italy<sup>19</sup>, France, Iran<sup>20</sup>, USA<sup>21</sup> and many other countries<sup>22</sup>. An early case report in 41 patients with laboratory-confirmed COVID-19 infection in Wuhan has been reported<sup>23</sup>. The median age of the patients was 49 years and mostly men (73%). Among those, 32% were admitted to the ICU because they required high-flow nasal cannula or higher-level oxygen support measures to correct hypoxaemia. Less than half had underlying diseases, including diabetes (20%), hypertension (15%), and cardiovascular diseases (15%). On admission, 98% of the patients had bilateral multiple lobular and subsegmental areas of consolidation (Figure 3)<sup>24</sup>.

**Figure 3**

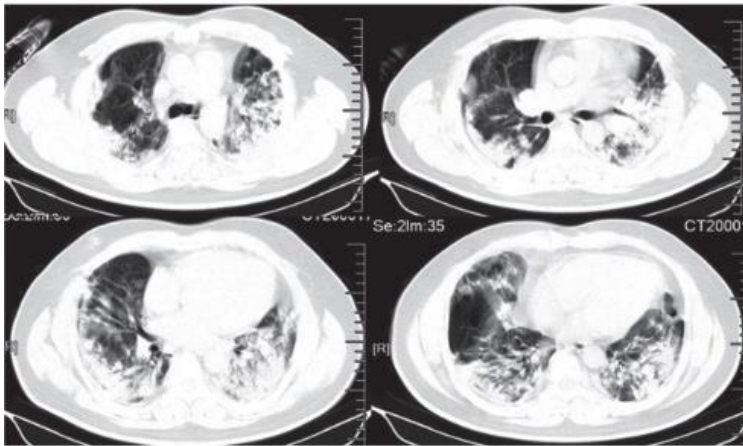

Figure 3 Caption: Transverse chest CT images from a 40-year-old man showing bilateral multiple lobular and subsegmental areas of consolidation on day 15 after symptom onset. Transverse chest CT images from a 53-year-old woman showing bilateral ground-glass opacity and subsegmental areas of consolidation on day 8 after symptom onset, adapted from<sup>23</sup>

Importantly, acute respiratory distress syndrome (ARDS) developed in 29% of the patients, while acute cardiac injury in 12%, and secondary infection in 10%. Invasive mechanical ventilation was required in 10% of those patients, **and two of them (5%) had refractory hypoxaemia and received extracorporeal membrane oxygenation (ECMO).**

In a later retrospective report by Wang and collaborators<sup>25</sup>, clinical characteristics of 138 patients with COVID-19 infection were described. Those patients were admitted at Zhongnan Hospital of Wuhan University in Wuhan, China, from January 1 to January 28, 2020. The median age was 56 years and clinical signs of the infection comprised fever (98.6%), fatigue (69.6%), and dry cough (59.4%). Interestingly, lymphopenia occurred in 70.3% of the patients, prolonged prothrombin time 58%, and elevated lactate dehydrogenase 39.9%. ICU admission was required in 26.1% of the patients for acute respiratory distress syndrome (61.1%), arrhythmia (44.4%), and shock (30.6%). Among these patients, 11.1% received high-flow oxygen therapy, 41.7% non-invasive ventilation, and 47.2% invasive ventilation. **ECMO support was needed in 11% of the patients admitted to the ICU.** During the period of follow-up, overall mortality was 4.3%.

## Objectives

### Hypothesis

We hypothesize that a significant percentage of patients with COVID-19 infection will require admission to the intensive care unit, mechanical ventilation and ECMO for refractory hypoxemia, in addition a substantial proportion of patients will present coagulation disorders and thrombosis.

### Aims

This is a multi-centre international study in patients with COVID-19 who require admission to the intensive care unit, mechanical ventilation and/or ECMO to characterize the following features:

1. Incidence of ICU admission, use of mechanical ventilation and ECMO
2. Risk factors
3. Clinical features
4. Coagulation disorders and thrombosis
5. Severity of respiratory failure
6. Need for non-invasive and invasive mechanical ventilation and ECMO
7. Settings of invasive mechanical ventilation
8. ECMO technical characteristics
9. Duration of ECMO
10. Complications
11. ICU survival
12. Hospital survival.
13. Requirements and the time frame for approvals in each participating network region

## Materials and Methods

### Study Design

This is an international multi-centre, prospective/retrospective observational study of patients in participating hospitals and ICUs with COVID-19 infection. The study will be conducted at 20 to 90 hospital networks globally and will aim to recruit as many patients as possible. The aim is to recruit all eligible patients at each study location and there is no maximum number of patients that can be recruited from any one site. Patients will be studied from time of ICU admission up to



28 days or until hospital discharge, whichever occurs later. Information will be collected on demographics, co-existing illnesses, severity of illness, source and type of clinical specimens (upper versus lower respiratory tract and collection date), results of microbiological tests. ECMOCARD will specifically focus on collecting data of mechanical ventilation and ECMO and administration of other major therapies (including vasoactive therapies, hypoxaemia rescue therapies, and dialysis), administration of antibiotics and antivirals (and adjunctive therapies, e.g. immunomodulators, corticosteroids) and outcomes at ICU (if applicable), hospital discharge and 28 days. Furthermore, there will be additional optional CRFs to collect data for the following sub-studies (further information is provided in the Data Collection section of this protocol):

- Coagulation Disorders and Thrombosis sub-study
- Neurology sub-study
- Cardiac sub-study
- Acute Kidney Injury sub-study

### Research centres

This is a collaborative effort among investigators of the Asia-Pacific Extracorporeal Life Support Organization (APELISO) in collaboration with centres within the SPRINT-SARI and ISARIC Network.

### Study Population

We plan to recruit as many patients as possible of the patients with COVID-19 infection admitted to the ICU, in as many locations as possible, who meet the inclusion criteria with no-exclusion criteria at the participating sites. It is anticipated that each participating Institution could contribute between 5 and 50 patients. Each site's recruitment will be determined by the incidence of the disease during the study period, and their ability to collect the required data.

### Inclusion Criteria

1. Clinical suspicion or laboratory-confirmed COVID-19 infection by real-time PCR and/or next-generation sequencing
2. Admission to an intensive care unit

### Exclusion Criteria

1. Patients treated with mechanical ventilation for other concomitant causes

## 2. Patients treated with ECMO for other concomitant causes

### Co-enrolment

This is an observational study. Co-enrolment with other studies including interventional clinical trials is accepted.

## Ethics

### Guiding Principles

The Chief Investigators and study management team are responsible for ensuring the study is performed in accordance with the protocol. This study is to be performed in accordance with the ethical principles of the Declaration of Helsinki (June 1964, most recently amended in October 2013), and the most recent, relevant ethical conduct of research guidelines published in the country of the participating site. The Principal Investigator at each site is responsible for maintenance of a securely held enrolment log linking the patient hospital record number and the study number as per their countries research guidelines.

### Comply with all local requirements

National or regional Co-ordinators in their defined location will be responsible for clarifying the requirements for ethics approval. It is the responsibility of the site Chief Investigator and Research Co-ordinator to ensure ethics approval has been granted prior to commencing the study and all local requirements are addressed. Each participating site will require ethics approval for this protocol and data collection of the ECMOCARD and ISARIC SPRINT-SARI CRF (RAPID, CORE, SUPPLEMENTARY TO CORE, DAILY and EPIDEMIOLOGY) and any other study documents relevant to their region. When possible, each participating study site will be supported by the ECMOCARD, Project Officer with their application. The Principal Investigator will produce progress reports, and any other required documentation for the local independent Ethics Committee in accordance with their guidelines. It is the responsibility of the Chief Investigator at each participating hospital to keep an up to date record of all correspondence and applicable documentation with the local Independent Ethics Committee. We will be collecting data on the requirements and the time frame for approvals in each participating network region.

## Confidentiality of patient data

No identifying data will be entered into the central database. Participants' names will not be collected, and confidentiality of information in medical records will be preserved. The confidentiality of the participant will be maintained unless disclosure is to comply with the law. To adhere to international ethical review board requirements and facilitate global ECMOCARD and SPRINT-SARI ISARIC data polling/sharing the CLiRes Data Management System will convert all dates entered (DD/MM/YYYY) into the eCRF into a re-identifiable format (D1, D2) at a system level. The original entered data (DD/MM/YYYY) will only be accessible by the site Research Co-ordinator and the site Principal Investigator using their unique database account details. ***In Australia, re-identifiable data will be entered into a central REDCap database hosted by Monash University and harmonised with the SPRINT-SARI study.***

### Rule of Transfer

It is proposed that if a patient is transferred from a facility participating in ECMOCARD and SPRINT-SARI to another facility that is also participating, the patient's previously allocated patient ID number will be documented in the CRF completed by the receiving hospital at time of admission. All sites participating in SPRINT-SARI will be asked to include a ECMOCARD and SPRINT-SARI study information sheet in the patients transferring documents, notifying the new hospital of the patient's inclusion in ECMOCARD and SPRINT-SARI, the patients re-identifiable participation number, the contact details of the Principle Investigator of ECMOCARD and SPRINT-SARI in the country and the ECMOCARD and SPRINT-SARI coordinating centre. If you are unsure if a patient has previously been enrolled in ECMOCARD and SPRINT-SARI please check to see if the patients transferring hospital and ward/unit are included in the participating sites list on the ECMOCARD and SPRINT-SARI website ([www.sprintsari.org](http://www.sprintsari.org)). Please use the patients existing ECMOCARD and SPRINT-SARI participant number at the new hospital when entering data into the paper and/or eCRF. Sites will not have access to any data collected outside their hospital; it is the responsibility of each hospital to enter data pertaining to their component of the patient's hospital admission. If a patient is transferred to a non-participating hospital, there will be no further data collection.

## International waiver of informed consent

It is expected that this study will not require individual patient consent. This study is in effect a large-scale clinical audit, as all data is already recorded as part of routine clinical care, therefore justifying participant enrolment using a waiver of consent. Waiver of consent may be available for studies that submit only re-identifiable information and where involvement in the research carries no more than low risk. Any location that deems individual consent necessary can use potential forms reported in the Appendix A. In particular, only in patients who meet the inclusion/exclusion criteria, informed consent will be obtained directly from the patient, either before the study or retrospectively in case the patient is unconscious at the time of enrolment. If the patient is unable to provide a consent form upon admission, informed consent will be obtained by his/her next of kin.

## Informed Consent in Australia

In Australia all patients admitted to the ICU and meeting all inclusion and no exclusion criteria will be included in ECMOCARD observational study. Their hospital data will be included under a waiver of consent, in line with the National Statement (chapter 2.3) and the NHMRC *Ethical Considerations in Quality Assurance and Evaluation Activities, 2014*.

Data for ECMOCARD and SPRINT SARI observational study will be concomitantly collected. In addition, to minimise workload for site staff, whenever possible, EXCEL data will be requested to complement ECMOCARD data. SPRINT-SARI and EXCEL have both been approved to recruit patients under a waiver of consent. Yet, it is important to emphasize that ethics approval certificate for Project 202/16 has the following special condition: “A waiver of the requirement for consent was granted for the collection and use of identifiable information during relevant epidemics and pandemics. An opt-out approach will be used at all other times.”

## Data Collection

### ISARIC Data Collection

As detailed in following paragraphs, we will collect data prospectively or retrospectively on patient demographics including age, sex, height, weight, and ethnicity, as well as the presence of predefined comorbidities. **General data will be collected from each site using the SPRINT-SARI data tool, namely the WHO and ISARIC NOVEL CORONAVIRUS (nCoV) ACUTE RESPIRATORY INFECTION**

**CLINICAL CHARACTERISATION** (<https://isaric.tghn.org/novel-coronavirus/>). As shown in figure 4, SPRINT-SARI data collection will start upon admission to the Hospital. The CRF was assembled by ISARIC members on the basis of the WHO natural history protocol, INFINITE (ANZICS), MOSAIC and others<sup>5,26</sup>. The CRF was assembled to be a basic CRF with the aims of avoiding data duplication, and with the intention of being user friendly and applicable in all settings, regardless of the resources available<sup>27</sup>. The CRF has previously been used in Singapore, New Zealand, Saudi Arabia, Vietnam, and North America and adapted by a working group for the purposes of this study with ISARIC approval to all changes made. In 2020, with the emergence of the COVID-19 epidemics, the ISARIC CRF eCRF were modified in order to characterize patients with this infection. In addition, Chief Investigators of the ECMOCARD trial further improved the ISARIC CRF eCRF to specifically describe COVID-19 patients admitted to the ICU and undergoing mechanical ventilation and ECMO.

#### COVID-19 Critical Care Consortium observational study Data Collection

Streamlined data-collection instruments and procedures will be used in an attempt to minimise the work in study centres. Specifically, we will collect data on the timing of ICU admission, endotracheal intubation, mechanical ventilation and ECMO commencement in relation to presumed onset of symptoms and hospital admission. We will investigate whether invasive mechanical ventilation and ECMO treatment was commenced in the participating hospital or whether the patient was retrieved and transferred while receiving invasive mechanical ventilation and/or ECMO from a referral centre. Severity of illness before endotracheal intubation and before ECMO will be investigated by respiratory rate, severity of hypoxemia, hypercapnia, non-pulmonary vital organ support, ventilator settings, and use of rescue ARDS therapies in the 12 hours before ECMO commencement. Dynamics of invasive mechanical ventilation and ECMO treatment will be recorded and characterized from commencement of invasive mechanical ventilation up to discontinuation (Figure 4). We will also collect administration of antiviral and antibiotic medications. Finally, duration of mechanical ventilation, ECMO, ICU and hospital stay, ICU and hospital mortality will be documented. In patients who died during hospital admission, we characterized the mode of death from a list of predefined options. Each patient's ELSO Registry patient identification number will be collected so that each patient record may be linked with the data contained within the ELSO Registry, which will be made as a formal data request to ELSO following ELSO procedures to

complement that collected as part of the COVID-19 Critical Care consortium observational study. **Of note, In Australian centres, patients enrolled into the study “A comprehensive national registry on the treatment and outcomes of patients requiring ECMO) (EXCEL Study) will be identified by the ECMOCARD eCRF. Likewise, in the EXCEL study eCRF, a specific question will be added to identify patients enrolled in the ECMOCARD. Thus, we will complement ECMOCARD CRF with data collected through the EXCEL study.**

Figure 4

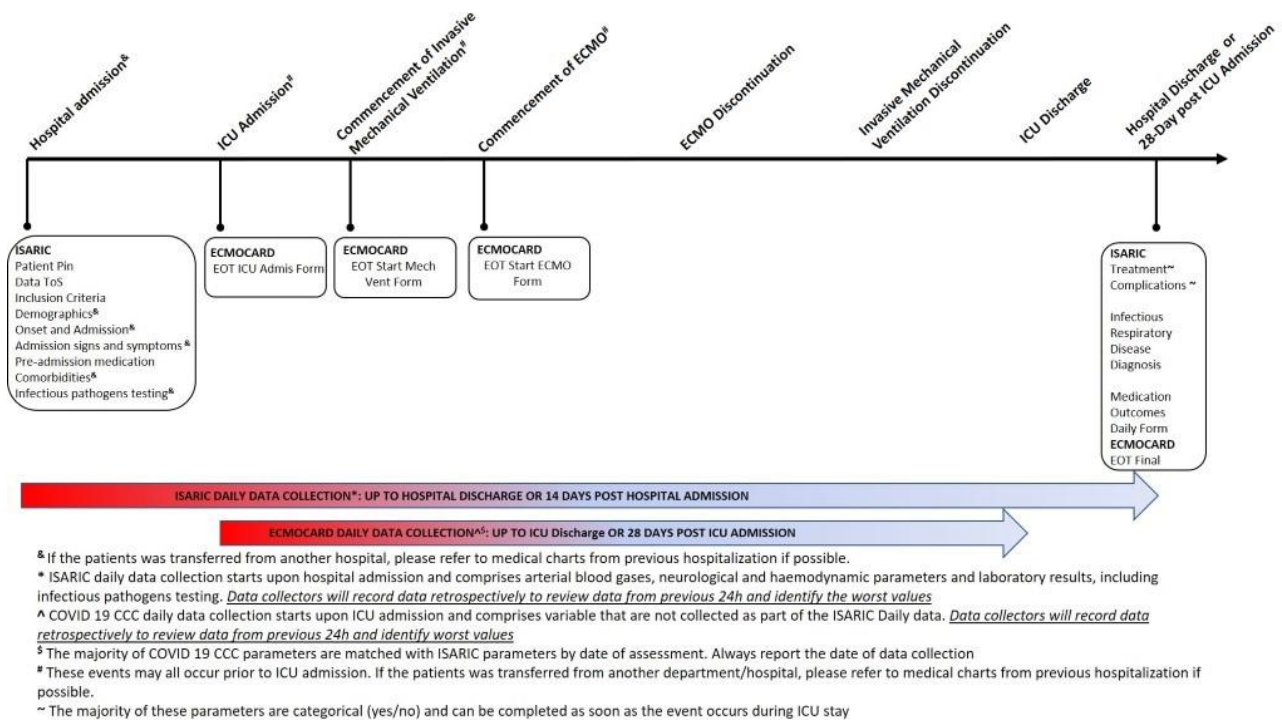

Figure 4 Caption: Follow-up schedule and assessments. ICU, intensive care unit; ECMO, extracorporeal membrane oxygenation.

### COVID-19 Critical Care Consortium observational study Basic Data Collection (Optional)

In collaborating sites with limited resources for data collection a modified Basic CRF will be proposed. In particular, we will use a CRF with significant reduction in data collection frequency, while ensuring collection of valuable data to achieve research targets and analysis of clinically relevant outcomes. No new data variables will be collected as part of the Basic CRF, but the frequency of daily data collection will be reduced from 14 days from hospital admission and on the day of ICU admission (ISARIC Daily form on REDCap) and every day of mechanical ventilation

(ECMOCARD EOT Daily form on REDCap), to a maximal total of 7 non-consecutive days as per the following timepoints.

1) Upon hospital admission:

- Inclusion Criteria form
- Demographics form
- Onset and Admission form
- Admission Signs and Symptoms form
- Pre-admission medication form
- Comorbidities form
- **Daily form**

2) Upon ICU admission

- **Daily form**
- EOT ICU Admis form

3) Four days after ICU admission.

If patient is not mechanically ventilated:

- **Daily form**

If patient is mechanically ventilated:

- **Daily form**
- **EOT Daily form**

4) Upon commencement of mechanical ventilation:

- **Daily form**
- EOT Start Mech Vent form
- **EOT Daily form**

5) Upon ECMO commencement:

- **Daily form**
- EOT Start ECMO form
- **EOT Daily form**

6) Upon ECMO discontinuation:

- **Daily form**

- EOT Daily form

7) Upon mechanical ventilation discontinuation:

- Daily form
- EOT Daily form

8) Upon hospital discharge or 28 days post ICU admission, whichever occurs later:

- Treatment form
- Complications form
- Infectious Respiratory Disease Diagnosis form
- Medication form
- Outcome form
- EOT Final form

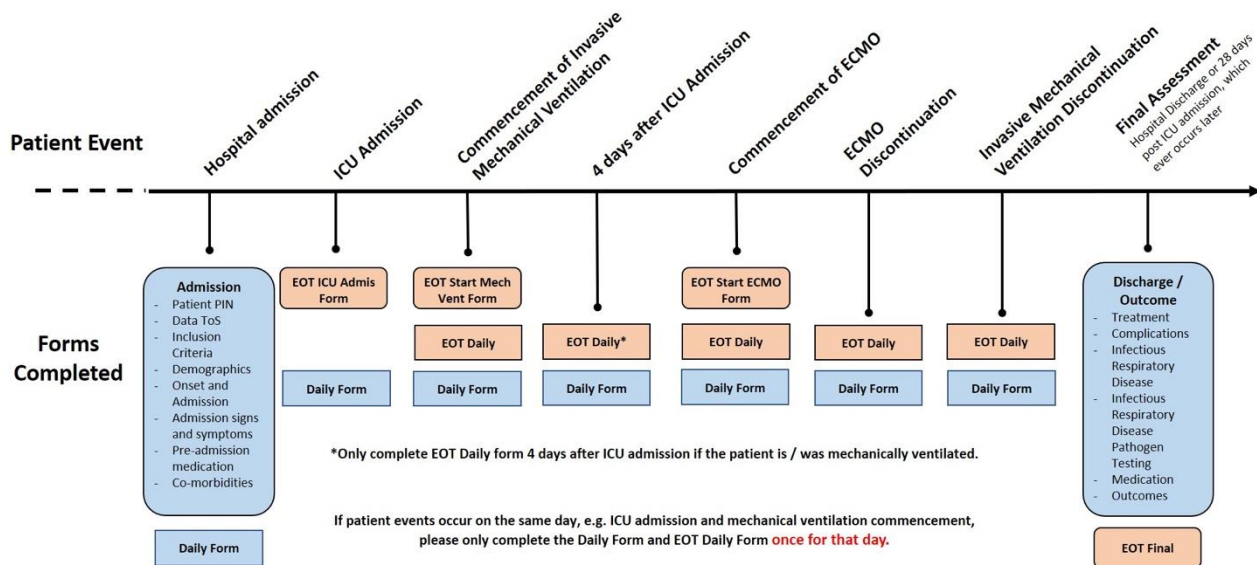

**Figure 5 Caption:** Basic case report form follow-up schedule and assessments showing the maximal number of assessments. ICU, intensive care unit; ECMO, extracorporeal membrane oxygenation.

### Coagulation Disorders and Thrombosis Sub-study Data Collection (Optional)

In collaborative centres that routinely perform rotational thromboelastometry (ROTEM) or thromboelastography (TEG) in their clinical practice, we will carry out an additional observational sub-study to appraise coagulation disorders and/or pro-thrombotic risks in COVID-19 patients in the ICU. As detailed in following paragraphs, upon admission to ICU, and every 24 hours thereafter, we



will collect data prospectively or retrospectively on coagulation disorders and pro-thrombotic risks until discontinuation of mechanical ventilation or in case of patients who are not mechanically ventilated, until 7 days post-ICU discharge. In addition, in centres that routinely use ROTEM, within 1h from a clinically relevant thrombosis/embolism or bleeding event, and 6h prior to commencement of ECMO, we will perform an additional ROTEM assessment to record TRAPTEM AUC, A6 and MS parameters. Following IRB approval of the Covid-19 Critical Care Consortium incorporating ECMOCARD protocol version 1.2.7, **data for the Coagulation Disorders and Thrombosis Sub-study will be collected from each collaborating site using the dedicated REDcap CRF, hosted at Oxford University.**

#### Neurology Sub-study Data Collection (Optional)

In collaborative centres with specific interest in the neurological impact of COVID-19, we will carry out an additional observational sub-study. As detailed in following paragraphs, we will collect data retrospectively on neurological comorbidities, central and peripheral nervous system complications during the hospital admission for COVID-19. In addition we will record crucial data on neuroimaging and markers of neurological injury. Finally, major outcomes and neurological function up to 28 days post ICU admission will be recorded. Following IRB approval of the Covid-19 Critical Care Consortium incorporating ECMOCARD protocol version 1.2.8, **data for the Neurology Sub-study will be collected from each collaborating site using the dedicated REDcap CRF, hosted at Oxford University.**

#### Cardiac Sub-study Data Collection (Optional)

In collaborative centres with specific interest in the cardiac impact of COVID-19, we will carry out an additional observational sub-study. As detailed in following paragraphs, we will collect data retrospectively on cardiac comorbidities, cardiac complications during the hospital admission for COVID-19, including myocardial infarction, arrhythmias, cardiogenic shock, cardiac arrest and any cardiac support provided. In addition we will record essential echocardiography data and markers of cardiac injury. Major outcomes up to 28 days post ICU admission will be obtained from the main COVID-19 Critical Care Consortium observational study. Following IRB approval of the Covid-19 Critical Care Consortium incorporating ECMOCARD protocol version 1.2.8, **data for the Cardiac Sub-**

***study will be collected from each collaborating site using the dedicated REDcap CRF, hosted at Oxford University.***

### Acute kidney injury Sub-study Data Collection (Optional)

In collaborative centres with specific interest in the impact of COVID-19 on kidneys function, we will carry out an additional observational sub-study. As detailed in following paragraphs, we will retrospectively collect additional parameters to evaluate:

1. Number of COVID-19 patients developing acute kidney injury (AKI) as defined by AKIN/KDIGO network criteria<sup>28</sup>, using creatinine and urine output as a definition
2. Influence of altered coagulation on AKI incidence and on mortality in COVID-19 AHRF/ARDS
3. Effect of MV modalities on AKI, specifically PEEP, proning and neuromuscular blockade
4. Outcomes of AKI in this population, including extent of recovery or renal function.
5. Mortality difference based on stages of AKIN/KDIGO network criteria AKI in patients with COVID-19 AHRF/ARDS

Of note, following IRB approval of the Covid-19 Critical Care Consortium incorporating ECMOCARD protocol version 1.2.8, ***data for the Cardiac Sub-study will be collected from each collaborating site using the dedicated REDcap CRF, hosted at Oxford University.***

### Data collection methods

Each site will have the option to collect data via Option 1 alone **OR** Option 1 +2. The method chosen will be a decision made at a site level. The options for data collection are as follows:

#### **OPTION 1: Standard Data Collection**

Both the SPRINT-SARI ISARIC and ECMOCARD CRF will be made available at all participating sites as a paper CRF. The SPRINT-SARI ISARIC and ECMOCARD CRFs will be available in a variety of languages and will be translated into languages appropriate for all participating sites. The translation of the paper and electronic CRFs from English into the required language will be the responsibility of the national lead investigators and collaborators of the Critical Care Research group and checked for consistency by an appropriate investigator in the relevant country. All data will be collected by trained staff at each study site and these individuals will enter all required data described in the protocol into the CRFs directly from the source data. Trained staff at sites with the

IT capabilities can enter all required data directly into the protected online database, known as the eCRF; paper CRFs are the alternative option for direct data entry with subsequent transcription, upon completion, into the eCRF. Information recorded in the CRF should accurately reflect the participants' medical/hospital notes. The Research Coordinator or Site Investigator will have the ability to choose the process they use to enter data into the eCRF, where data may be entered at one time or intermittently. If used, the original paper based CRF will be stored within a locked office in each study site. The intent of this process is to improve the quality of the clinical study by providing prompt feedback to the Investigators on the progress of the submitted data and to enhance the ability to collect early safety information in a more timely fashion to fully comply with the intent of GCP requirements. **Data from International countries will be entered into an online eCRF database managed by the Oxford University Clinical Research Unit (OUCRU) for the SPRINT-SARI ISARIC and ECMOCARD tiers. Data from Australia will be entered into an online eCRF database managed by Monash University, and will be complemented with data from SPRINT SARI observational study (ALFRED HREC Reference 202/16) and EXCEL (ALFRED HREC Reference 534/18)).** In countries unable to upload data on a centralised database the right to retain a local database on a national server is available with aggregated completely anonymised data exported centrally for analysis. Each site will be identified via a 3-digit network code, a 3-digit site code, and each patient will be assigned a 4-digit sequential patient code making up the patient ID number at time of originally enrolment in SPRINT- SARI. The site-code will be specified as to whether it is an ICU, hospital ward, or other facility. The site code is obtained by registering on the eCRF, data management system. Patient numbers should be assigned sequentially for each site beginning with 0001. In the case of a single site recruiting patients on different wards, or where it is otherwise difficult to assign sequential numbers, it is acceptable to assign numbers in blocks. Alpha characters can also be used (e.g. Intensive Care Unit will assign A001 onwards, in-patient ward will assign B001 onwards). **The full patient identification number will therefore be a 10-digit number, with the format of the following: network code - site code – individual patient code [ ][ ][ ]-[ ][ ][ ]-[ ][ ][ ][ ](eg. 001-012-0001).** **The register of patient names and study numbers will not leave the participating hospital. Access to the data entry system will be protected by username and password.** Username and password will be assigned during the registration process for individual

Research Coordinators or Site Investigators. All electronic data transfer between study site and database will be username and password protected. Each centre will maintain a trial file including a protocol, ethics approval documentation, and paper CRFs. A participant list will be used in each study site to match identifier codes in the database to individual patients in order to record clinical outcomes and supply any missing data points. The Participant List is maintained locally and is not to be transferred to any other location. The Research Coordinator will compile an enrolment log including the patient's name, age, hospital identification number and unique study number. Subsequent data will be identified by the unique study number only. The enrolment log and study data will be kept separately.

## OPTION 2: Interactive augmented data collection

We will use platforms and solutions provided by Amazon to collect data and transfer data into the REDcap web application. Data will be collected through 1) voice commands; 2) digital video monitor interface and 3) through digital transcription of parameters collected via SPRINT-SARI/ECMOCARD paper CRFs. Similar to option 1, only de-identified information will be collected, encrypted and transferred directly to the REDCAP database. No data or information of any kind will be directed elsewhere. Amazon Web Services will not have any direct interaction with the enhanced user-interface once it is implemented and will only act in an external consultancy capacity. Data will be fully encrypted from data ingestion into Amazon cloud, up to de-encryption into the REDcap web application. Thus Amazon platform will only channel, without being able to codify, data from hospitals into the REDcap system.

### Data collection methods (Coagulation Disorders and Thrombosis sub-study)

As for the Coagulation Disorders and Thrombosis Sub-study, the CRF will be also made available at all collaborating sites as a paper CRF. The Coagulation Disorders and Thrombosis Sub-study CRF will be only available in English. Data will be collected by trained staff at each study site and these individuals will enter all required data described in the protocol into the CRFs directly from laboratory results, ROTEM or TEG reports. All data will only be collected if done as part of standard clinical practice. If clinical tests are not routinely completed at the study time points, this data is not required. Trained staff at sites with the IT capabilities can enter all required data directly

into the protected online database hosted at Oxford University, known as the eCRF; paper CRFs are the alternative option for direct data entry with subsequent transcription, upon completion, into the eCRF. Information recorded in the CRF should accurately reflect the participants' laboratory results, ROTEM or TEG reports. The Research Coordinator or Site Investigator will have the ability to choose the process they use to enter data into the eCRF, where data may be entered at one time or intermittently. If used, the original paper based CRF will be stored within a locked office in each study site. The intent of this process is to improve the quality of the clinical study by providing prompt feedback to the Investigators on the progress of the submitted data and to enhance the ability to collect early safety information in a more timely fashion to fully comply with the intent of GCP requirements. **Data will be entered into an online eCRF database managed by Oxford University.** In Countries unable to upload data on a centralised database the right to retain a local database on a national server is available with aggregated completely anonymised data exported centrally for analysis. **The full patient SPRINT-SARI/ECMOCARD identification number will be recorded to match results of the Coagulation Disorders and Thrombosis Sub-study with SPRINT-SARI/ECMOCARD records. The register of patient names and study numbers will not leave the participating hospital. Access to the data entry system will be protected by username and password.** Username and password will be assigned by Oxford University, during the registration process for individual Research Coordinators or Site Investigators. All electronic data transfer between study site and database will be username and password protected. The Participant List of the Coagulation Disorders and Thrombosis Sub-study is maintained locally and is not to be transferred to any other location.

#### Data collection methods (Neurology sub-study)

As for the Neurology Sub-study, the CRF will be also made available at all collaborating sites as a paper CRF. The Neurology Sub-study CRF will be only available in English. Data will be collected by trained staff at each study site and these individuals will enter all required data described in the protocol into the CRFs directly from medical charts, laboratory results and medical imaging reports. All data will only be collected if done as part of standard clinical practice. If clinical tests are not routinely completed at the study time points, this data is not required. Trained staff at sites with the IT capabilities can enter all required data directly into the protected online database hosted at

Oxford University, known as the eCRF; paper CRFs are the alternative option for direct data entry with subsequent transcription, upon completion, into the eCRF. Information recorded in the CRF should accurately reflect the participants' details recorded in medical charts, laboratory results and medical imaging reports. The Research Coordinator or Site Investigator will have the ability to choose the process they use to enter data into the eCRF, where data may be entered at one time or intermittently. If used, the original paper based CRF will be stored within a locked office in each study site. The intent of this process is to improve the quality of the clinical study by providing prompt feedback to the Investigators on the progress of the submitted data and to enhance the ability to collect early safety information in a more timely fashion to fully comply with the intent of GCP requirements. **Data will be entered into an online eCRF database managed by the Oxford University.** In Countries unable to upload data on a centralised database the right to retain a local database on a national server is available with aggregated completely anonymised data exported centrally for analysis. **The full patient SPRINT-SARI/ECMOCARD identification number will be recorded to match results of the Neurology Sub-study with SPRINT-SARI/ECMOCARD records. The register of patient names and study numbers will not leave the participating hospital. Access to the data entry system will be protected by username and password.** Username and password will be assigned by the Oxford University during the registration process for individual Research Coordinators or Site Investigators. All electronic data transfer between study site and database will be username and password protected. The Participant List of the Neurology Sub-study is maintained locally and is not to be transferred to any other location.

#### Data collection methods (Cardiac sub-study)

As for the Cardiac Sub-study, the CRF will be also made available at all collaborating sites as a paper CRF. The Cardiac Sub-study CRF will be only available in English. Data will be collected by trained staff at each study site and these individuals will enter all required data described in the protocol into the CRFs directly from medical charts, laboratory results, and medical imaging reports. All data will only be collected if done as part of standard clinical practice. If clinical tests are not routinely completed at the study time points, this data is not required. Trained staff at sites with the IT capabilities can enter all required data directly into the protected online database hosted at Oxford University, known as the eCRF; paper CRFs are the alternative option for direct data entry

with subsequent transcription, upon completion, into the eCRF. Information recorded in the CRF should accurately reflect the participants' details recorded in medical charts, laboratory results, and medical imaging reports. The Research Coordinator or Site Investigator will have the ability to choose the process they use to enter data into the eCRF, where data may be entered at one time or intermittently. If used, the original paper based CRF will be stored within a locked office in each study site. The intent of this process is to improve the quality of the clinical study by providing prompt feedback to the Investigators on the progress of the submitted data and to enhance the ability to collect early safety information in a more timely fashion to fully comply with the intent of GCP requirements. **Data will be entered into an online eCRF database managed by Oxford University.** In Countries unable to upload data on a centralised database the right to retain a local database on a national server is available with aggregated completely anonymised data exported centrally for analysis. **The full patient SPRINT-SARI/ECMOCARD identification number will be recorded to match results of the Neurology Sub-study with SPRINT-SARI/ECMOCARD records. The register of patient names and study numbers will not leave the participating hospital. Access to the data entry system will be protected by username and password.** Username and password will be assigned by Oxford University during the registration process for individual Research Coordinators or Site Investigators. All electronic data transfer between study site and database will be username and password protected. The Participant List of the Cardiac Sub-study is maintained locally and is not to be transferred to any other location.

#### Data collection methods (Acute Kidney Injury sub-study)

As for the Acute Kidney Injury Sub-study, the CRF will be also made available at all collaborating sites as a paper CRF. The Acute Kidney Injury Sub-study CRF will be only available in English. Data will be collected by trained staff at each study site and these individuals will enter all required data described in the protocol into the CRFs directly from medical charts, laboratory results, and medical imaging reports. All data will only be collected if done as part of standard clinical practice. If clinical tests are not routinely completed at the study time points, this data is not required. Trained staff at sites with the IT capabilities can enter all required data directly into the protected online database hosted at Oxford University, known as the eCRF; paper CRFs are the alternative option for direct data entry with subsequent transcription, upon completion, into the

eCRF. Information recorded in the CRF should accurately reflect the participants' details recorded in medical charts, laboratory results, and medical imaging reports. The Research Coordinator or Site Investigator will have the ability to choose the process they use to enter data into the eCRF, where data may be entered at one time or intermittently. If used, the original paper based CRF will be stored within a locked office in each study site. The intent of this process is to improve the quality of the clinical study by providing prompt feedback to the Investigators on the progress of the submitted data and to enhance the ability to collect early safety information in a more timely fashion to fully comply with the intent of GCP requirements. **Data will be entered into an online eCRF database managed by Oxford University.** In Countries unable to upload data on a centralised database the right to retain a local database on a national server is available with aggregated completely anonymised data exported centrally for analysis. **The full patient SPRINT-SARI/ECMOCARD identification number will be recorded to match results of the Neurology Sub-study with SPRINT-SARI/ECMOCARD records. The register of patient names and study numbers will not leave the participating hospital. Access to the data entry system will be protected by username and password.** Username and password will be assigned by Oxford University during the registration process for individual Research Coordinators or Site Investigators. All electronic data transfer between study site and database will be username and password protected. The Participant List of the Acute Kidney Injury Sub-study is maintained locally and is not to be transferred to any other location.

### Screening log

No screening log will be maintained.

### Data quality

Several procedures to ensure data quality and protocol standardisation will help to minimise bias. These include:

1. Online meetings for all research coordinators will be held to ensure consistency in procedures;
2. A detailed data dictionary will define the data to be collected on the case report form;



- Quality checks will be built into the data management system and there will be quality checks of critical data points entered into the CRFs to ensure standardization and validity of the data collected;

An achievable data set will be fundamental to the success of the study. We have identified the key data points whilst not discouraging centres from participating through an excessive burden of data collection. Data queries may be generated, depending on resource availability. Any information that is not available for the investigator will not be considered as missing. No assumptions will be made for missing data.

### Data management

Data entry and data management will be coordinated by ISARIC and ECMOCARD steering committee, including programming and data management support. On behalf of the management committee, ANZIC-RC and ISARIC will act as custodian of the data. The University of Queensland will receive data from the data custodians via data sharing agreements. The management committee of the trial will take responsibility for the content and integrity of any data. There will be periodic assessments of data burden to ensure that the infrastructure is organized to handle large amounts of incoming data in small time periods. SPRINT-SARI and ECMOCARD will adhere to the research and data sharing policies of ISARIC, Sample and Data Sharing Policy, Version 4, 21 July 2014. ***Clinical investigators contributing to the research efforts will be given full recognition for their efforts and will be given the opportunity to access data. Ownership of any data transferred to the eCRF will be retained by the site that contributed it.*** Networks will retain the right to request raw data for all sites included in their network for research purposes, provided that the research proposal has been reviewed and approved by the management committee, ISARIC and ECMOCARD following publication of the primary manuscript. All analysis of pooled data will be undertaken with the explicit agreement of each site who contributed. ISARIC and ECMOCARD will retain the right to use all pooled data for scientific and other purposes. All members of the study group will have the right to access the pooled data for research purposes provided the research proposal has been reviewed and deemed satisfactory by the management committee following publication of the primary manuscript. Only summary data will be presented publicly. Individual patient data provided by participating sites will remain the property of the respective institution. Of note, a data

management plan will be developed to address researchers' intentions related to generation, collection, access, use, analysis, disclosure, storage, retention, disposal, sharing and re-use of data and information, the risks associated with these activities and any strategies for minimising those risks.

### Monitoring

Data monitoring will be conducted on a randomly selected subset (up to 5%) of cases, through discussion with the local site investigator to discuss data collection techniques. Direct site visits will not be feasible, given the scope of the study.

### Collected Parameters

The following parameters will be assessed and recorded based on the follow-up schedule and assessments reported in Figure 4.

#### Demographics and Medical History

1. Personal Data
2. Medical History and comorbidities, including type of anti-hypertensive medications
3. Smoking habits
4. Chronic alcohol abuse
5. Intravenous drug abuse
6. Immuno-competency status

#### COVID-19 infection

1. Date of first signs of infection
2. Date of hospital admission
3. Date of ICU admission
4. Date of invasive mechanical ventilation
5. Blood gases before commencement of invasive mechanical ventilation
6. Use of continuous renal replacement therapy before commencement of invasive mechanical ventilation
7. Use of vasoactive drugs before commencement of invasive mechanical ventilation
8. Use of cardiac-assist devices before commencement of invasive mechanical ventilation
9. Acute physiology and chronic health evaluation (APACHE II) score upon ICU admission

10. Use of anti-viral treatment
11. Use of antibiotics
12. Cutaneous manifestations

#### Clinical parameters upon commencement of invasive mechanical ventilation

1. Date of invasive mechanical ventilation commencement
2. Use of prone position
3. Use of neuromuscular blockade
4. Use of recruitment manoeuvres
5. Use of inhaled nitric oxide
6. Use of bicarbonate
7. Blood gases
8. Ventilatory mode
9. Inspiratory fraction of oxygen
10. Respiratory rate
11. Tidal volume (ml/Kg of ideal body weight)
12. Positive end-expiratory pressure
13. Airway plateau pressure

#### Daily assessment of clinical parameters during invasive mechanical ventilation

1. Date of assessment
2. Use of prone position
3. Use of neuromuscular blockade
4. Use of recruitment manoeuvres
5. Use of inhaled nitric oxide
6. Blood gases
7. Ventilatory mode
8. Inspiratory fraction of oxygen
9. Respiratory rate
10. Tidal volume (ml/Kg of ideal body weight)
11. Positive end-expiratory pressure

12. Airway plateau pressure
13. Haemoglobin
14. White blood cells
15. AST
16. ALT
17. Lactate
18. Creatinine
19. Ferritin
20. D-dimer
21. Troponins
22. BNP
23. Use of continuous renal replacement therapy
24. Use of vasoactive drugs
25. Use of anticoagulants
26. Transfused blood products
27. Infectious complications
28. Haemorrhagic complications

#### Clinical features before commencement of ECMO

1. Date of ECMO commencement
2. Use of prone position
3. Use of neuromuscular blockade
4. Use of recruitment manoeuvres
5. Use of inhaled nitric oxide
6. Use of bicarbonate
7. Blood gases
8. Ventilatory mode
9. Inspiratory fraction of oxygen
10. Respiratory rate
11. Tidal volume (ml/Kg of ideal body weight)

12. Positive end-expiratory pressure

13. Airway plateau pressure

#### ECMO characteristics

1. Type and manufacturer of centrifugal blood pump driven circuit
2. Type and manufacturer of low-resistance oxygenator
3. Type of ECMO: venous-venous or venous-arterial
4. Peripheral access: femoral, jugular, both
5. ECMO blood flow rate day 0, and every 24 hours thereafter
6. ECMO gas flow rate day 0, and every 24 hours thereafter
7. Anticoagulation during ECMO
8. Frequency of ECMO circuit change
9. Ventilatory settings on ECMO
10. Vasoactive support on ECMO
11. Organ dysfunctions on ECMO

#### ECMO adverse effects

1. Transfused blood during ECMO
2. Transfused plasma during ECMO
3. Transfused platelets during ECMO
4. Transfused cryoprecipitates during ECMO
5. Type and source of infectious complications
6. Type and source of haemorrhagic complications
7. Other complications

#### Daily assessments for Coagulation Disorders and Thrombosis Sub-study

1. SPRINT-SARI/ECMOCARD patient number
2. Date of assessment
3. Lactate dehydrogenase
4. Ferritin
5. D-dimer
6. Fibrinogen

7. Activated clotting time
8. Activated partial thromboplastin time
9. International normalised ration
10. Plasma free haemoglobin
11. ROTEM parameters (EXTEM, FIBTEM, INTEM, HEPTEM, TRAPTEM, NATEM if patients undergoing treatment with low molecular weight heparin and ECATEM if patients undergoing treatment with direct thrombin inhibitors)
12. TEG parameters

#### Main outcomes

1. Date of ECMO discontinuation
2. Date of invasive mechanical ventilation discontinuation
3. Date of ICU Discharge
4. Date of Hospital Discharge
5. Mortality at 28 days
6. Main cause of death

#### Sub-studies

As mentioned above, site investigators will have the option to collect additional clinical data on the impact of COVID-19 on coagulation disorders and thrombosis, neurology, cardiac and acute kidney injury as part of specific sub-studies focusing on these clinical features. The following parameters per each sub-study will be assessed and recorded.

#### *Coagulation disorders and thrombosis sub-study*

Investigators interested in coagulation disorders and thrombosis sub-study will collect daily following parameters, if available as part of standard clinical practice:

1. Laboratory parameters (PT aPTT INR ACT LDH; Fibrinogen; Plasma Free Hemoglobin Anti-Xa; Ferritin; D-Dimer; IL-6; CRP; Lupus Anticoagulant Protein C; Von Willebrand Factor Antigen; Antithrombin; Ristocetin)
2. Rotem or TEG parameters

3. Medications and dosing (Heparin; Heparin infusion (IV); Low Molecular weight heparin; Warfarin; Rivaroxaban; Apixaban; Aspirin; Argatroban; Bivalrudin; DDAVP; AMICAR (epsilon-Aminocaproic acid); Tranexamic Acid; Protamine; Andexanet Alfa)
4. Bleeding and thrombosis events
5. Administered blood products

#### *Neurology sub-study*

Investigators interested in the neurology sub-study will collect following parameters, if available as part of standard clinical practice:

1. Previous chronic neurological disorders
2. Modified Rankin scale
3. Central nervous system complications during ICU stay (ischemic stroke; intracranial haemorrhage; hypoxic ischemic brain injury; meningitis/encephalitis; transverse myelitis; seizure; delirium)
4. Peripheral nervous system complications during ICU stay (Guillan-Barre syndrome; critical illness myopathy-neuropathy; hypogeusia/hyposmia)
5. Management of above-mentioned complications
6. Results of neuro-imaging assessments
7. Biomarkers
8. Withdrawal of treatment and modified RANKIN scale at ICU discharge and 28 days thereafter

#### *Cardiac sub-study*

Investigators interested in the cardiology sub-study will collect following parameters, if available as part of standard clinical practice:

1. Previous chronic cardiac disorders (ischemic heart disease; angina; heart failure; arrhythmias; permanent pacemaker/implanted cardiac defibrillator/previous cardiac resynchronization therapy; heart transplant; mechanical circulatory support device; congenital heart disease; cardiomyopathy; previous cardiac arrest)
2. Cardiac complications during ICU stay and management during and post event (acute myocardial infarction; myocarditis; Takotsubo cardiomyopathy; new onset arrhythmias; cardiac arrest)

3. Medical therapy of shock state
4. Mechanical circulatory support
5. Results of echocardiography
6. Biomarkers
7. Administered blood products

#### *Acute kidney injury sub-study*

In patients in whom mild acute kidney injury develops (serum creatinine rise >20% from baseline; or upper normal level where no evidence of chronic renal failure) Investigators interested in the acute kidney injury sub-study will collect, the following parameters, if available as part of standard clinical practice:

1. *Upon ICU admission:* Baseline renal function at or prior hospital admission (serum creatinine; urine specific gravity; proteinuria; haematuria) and medications prior to ICU admission (NSAIDS; Aminoglycoside; Vancomycin; Diuretics; ACEI/ARBs)
2. *Daily:* Medications (NSAIDS; Aminoglycoside; Vancomycin; Diuretics; ACEI/ARBs); laboratory and clinical parameters (fluid and drug volume infused in last 24hrs; carboxyhaemoglobin); dialysis features (main indication; type; anticoagulation; calcium; complications)
3. *Final outcomes:* Dialysis-dependent status at ICU and hospital discharge

## Data Analysis

The global analysis of SPRINT-SARI/ECMOCARD and Coagulation Disorders and Thrombosis Sub-study categorical variables will be described as proportions and will be compared using chi-square or Fisher's exact test. Continuous variables will be described as mean and standard deviation if normally distributed or median and inter-quartile range if not normally distributed. Comparisons of continuous variables will be performed using one-way ANOVA or Mann-Whitney test, as appropriate. A logistic regression model will be performed to assess independent association between prognostic factors and outcomes, taking into account the hierarchical nature of the data. Significance will be set at  $p < 0.05$ .



## Reference List

1. Bolotin S, Pebody R, White PJ, et al. A new sentinel surveillance system for severe influenza in England shows a shift in age distribution of hospitalised cases in the post-pandemic period. *PLoS One*. 2012;7(1). doi:10.1371/journal.pone.0030279
2. Dawood FS, Iuliano AD, Reed C, et al. Estimated global mortality associated with the first 12 months of 2009 pandemic influenza A H1N1 virus circulation: A modelling study. *Lancet Infect Dis*. 2012;12(9):687-695. doi:10.1016/S1473-3099(12)70121-4
3. Simonsen L, Spreeuwenberg P, Lustig R, et al. Global Mortality Estimates for the 2009 Influenza Pandemic from the GLaMOR Project: A Modeling Study. *PLoS Med*. 2013;10(11). doi:10.1371/journal.pmed.1001558
4. Huang QS, Baker M, McArthur C, et al. Implementing hospital-based surveillance for severe acute respiratory infections caused by influenza and other respiratory pathogens in New Zealand. *West Pacific Surveill response J WPSAR*. 2014;5(2):23-30. doi:10.5365/WPSAR.2014.5.1.004
5. Critical Care Services and 2009 H1N1 Influenza in Australia and New Zealand. *N Engl J Med*. 2009;361(20):1925-1934. doi:10.1056/NEJMoa0908481
6. Guery B, Poissy J, El Mansouf L, et al. Clinical features and viral diagnosis of two cases of infection with Middle East Respiratory Syndrome coronavirus: A report of nosocomial transmission. *Lancet*. 2013;381(9885):2265-2272. doi:10.1016/S0140-6736(13)60982-4
7. Weiss SR, Navas-Martin S. Coronavirus Pathogenesis and the Emerging Pathogen Severe Acute Respiratory Syndrome Coronavirus. *Microbiol Mol Biol Rev*. 2005;69(4):635-664. doi:10.1128/mmbr.69.4.635-664.2005
8. Drosten C, Günther S, Preiser W, et al. Identification of a Novel Coronavirus in Patients with Severe Acute Respiratory Syndrome. *N Engl J Med*. 2003;348(20):1967-1976. doi:10.1056/NEJMoa030747
9. Ksiazek TG, Erdman D, Goldsmith CS, et al. A Novel Coronavirus Associated with Severe Acute Respiratory Syndrome. *N Engl J Med*. 2003;348(20):1953-1966. doi:10.1056/NEJMoa030781
10. Zaki AM, Van Boheemen S, Bestebroer TM, Osterhaus ADME, Fouchier RAM. Isolation of a

- novel coronavirus from a man with pneumonia in Saudi Arabia. *N Engl J Med.* 2012;367(19):1814-1820. doi:10.1056/NEJMoa1211721
11. de Groot RJ, Baker SC, Baric RS, et al. Middle East Respiratory Syndrome Coronavirus (MERS-CoV): Announcement of the Coronavirus Study Group. *J Virol.* 2013;87(14):7790-7792. doi:10.1128/jvi.01244-13
  12. WHO | Summary of probable SARS cases with onset of illness from 1 November 2002 to 31 July 2003. *WHO.* 2015.
  13. WHO | Middle East respiratory syndrome coronavirus (MERS-CoV). *WHO.* 2020.
  14. Chan JF-W, Yuan S, Kok K-H, et al. A familial cluster of pneumonia associated with the 2019 novel coronavirus indicating person-to-person transmission: a study of a family cluster. *Lancet.* January 2020. doi:10.1016/S0140-6736(20)30154-9
  15. Zhu N, Zhang D, Wang W, et al. A Novel Coronavirus from Patients with Pneumonia in China, 2019. *N Engl J Med.* January 2020:NEJMoa2001017. doi:10.1056/NEJMoa2001017
  16. WHO | Novel Coronavirus – Thailand (ex-China). *WHO.* 2020.
  17. WHO | Novel Coronavirus – Japan (ex-China). *WHO.* 2020.
  18. WHO | Novel Coronavirus – Republic of Korea (ex-China). *WHO.* 2020.
  19. Spina S, Marrazzo F, Migliari M, Stucchi R, Sforza A, Fumagalli R. The response of Milan's Emergency Medical System to the COVID-19 outbreak in Italy. *Lancet (London, England).* 2020;0(0). doi:10.1016/S0140-6736(20)30493-1
  20. Ebrahim SH, Memish ZA. COVID-19: preparing for superspreader potential among Umrah pilgrims to Saudi Arabia. *Lancet.* 2020;0(0). doi:10.1016/S0140-6736(20)30466-9
  21. Holshue ML, DeBolt C, Lindquist S, et al. First Case of 2019 Novel Coronavirus in the United States. *N Engl J Med.* 2020;382(10):929-936.  
<http://www.nejm.org/doi/10.1056/NEJMoa2001191>. Accessed March 10, 2020.
  22. Sun K, Chen J, Viboud C. Early epidemiological analysis of the coronavirus disease 2019 outbreak based on crowdsourced data: a population-level observational study. *Lancet Digit Heal.* 2020;0(0). doi:10.1016/S2589-7500(20)30026-1
  23. Huang C, Wang Y, Li X, et al. Clinical features of patients infected with 2019 novel coronavirus in Wuhan, China. *Lancet.* 2020;395(10223):497-506. doi:10.1016/S0140-

6736(20)30183-5

24. Shi H, Han X, Jiang N, et al. Radiological findings from 81 patients with COVID-19 pneumonia in Wuhan, China: a descriptive study. *Lancet Infect Dis*. 2020;0(0). doi:10.1016/S1473-3099(20)30086-4
25. Wang D, Hu B, Hu C, et al. Clinical Characteristics of 138 Hospitalized Patients With 2019 Novel Coronavirus-Infected Pneumonia in Wuhan, China. *JAMA*. February 2020. doi:10.1001/jama.2020.1585
26. André T, Boni C, Mounedji-Boudiaf L, et al. Oxaliplatin, fluorouracil, and leucovorin as adjuvant treatment for colon cancer. *N Engl J Med*. 2004;350(23):2343-2351. doi:10.1056/NEJMoa032709
27. Dunning JW, Merson L, Rohde GGU, et al. Open source clinical science for emerging infections. *Lancet Infect Dis*. 2014;14(1):8-9. doi:10.1016/S1473-3099(13)70327-X
28. Chawla LS, Bellomo R, Bihorac A, et al. Acute kidney disease and renal recovery: Consensus report of the Acute Disease Quality Initiative (ADQI) 16 Workgroup. *Nat Rev Nephrol*. 2017;13(4):241-257. doi:10.1038/nrneph.2017.2

## Regulation, Ethics and Governance

Protocol and any following amendment to the original protocol will be translated to the main language of the collaborative institution and submitted for the approval of each institutional review board (IRB). All protocols of the study will require approval by each institutional review board, before enrolment of patients. Sites should apply for a waiver of consent to be granted given the negligible risk nature of the study and the need for rapid data collection to inform pandemic responses globally. Sites wishing to participate in each sub-study will be required to provide the Covid-19 Critical Care Consortium Research Coordinator with an IRB approval certificate. In particular IRB approval of protocol version 1.2.7 will be required to participate to the Coagulation Disorders and Thrombosis study; while, IRB approval of protocol version 1.2.8 will be required to participate to Neurology, Cardiac or Acute Kidney Injury Sub-studies. Only after IRB approval certificate will be provided, sites will be granted access to the relevant sub-study REDCap databases.

### Conflict of interest

The investigators of the APELSON network DO NOT have any significant financial or personal interest that would reasonably appear to be affected by the proposed research activities.

### Data collection and Site Monitoring plan

#### Data Collection

Data will be collected in dedicated electronic forms and/or hard copies as provided by the SPRINT-SARI and ISARIC Organisations (APPENDIX B) and the ECMOCARD Steering Committee (APPENDIX C). A custom-designed electronic case report form has been developed in REDcap, which is hosted at the University of Oxford and for all Australian centres will be hosted at Monash University, Melbourne, Australia. A custom-designed electronic case report form has been developed in REDcap for the Coagulation Disorders and Thrombosis Sub-study, which is hosted at the University of Queensland. Hard copies and electronic data will be kept for at least 7 years following the conclusion of the study. Each investigator will be responsible to collect and preserve data obtained at his/her collaborative institution.

#### Site Monitoring

Periodic conference calls will be organized with all investigators or investigators of specific collaborative centres to monitor the quality of the data collected, address specific issues in data

collection and prepare future publications. Data queries will be generated by the Consortium Data Management Team and disseminated to sites for review and correction in the REDCap database as appropriate.

### Compensations

No compensation will be offered to collaborating institutions.

### Data Access

All essential documentation of the SPRINT-SARI/ECMOCARD and the Coagulation Disorders and Thrombosis Sub-study will be stored in an Investigator Study File (ISF), which will be held by the Critical Care Research Group (CCRG), University of Queensland. On completion of the study, this information will be archived by the CCRG. Following the publication of the primary and secondary outcomes, additional analyses could be undergone on the data collected. In the event of publications arising from these analyses, those responsible will need to provide the Chief Investigator with a copy of the manuscript for approval prior to submission.

### Feasibility

This is a multi-centre study performed within the COVID-19 Critical Care Consortium, which comprises the SPRINT-SARI, ISARIC, ELSO and APELSO networks of clinical research institutions, during an emergent new respiratory infection caused by the new COVID-19 virus. The study will be conducted in intensive care units with broad experience in mechanical ventilation, ECMO and coagulation disorders and thrombosis. Further intra-mural and extra-mural collaborations beyond the COVID-19 Critical Care Consortium and SPRINT-SARI, ISARIC and APELSO networks will be potentially pursued to promptly achieve goals. In summary, the COVID-19 Critical Care Consortium multidisciplinary and international research team of collaborators provides ideal conditions to perform reported study.

### Dissemination and Publication

#### Publication policy

Ownership of the data arising from the study resides with the study teams. Data requested from SPRINT-SARI and EXCEL investigators will reside with their own study teams. After the study, results will be analysed and tabulated, and a study report will be prepared. This report will be made

available to the study collaborators and the relevant IRBs. The study findings will be presented at national and international meetings. We plan to publish our study findings in a high-quality peer reviewed journal. SPRINT-SARI and EXCEL studies will be fully acknowledged in all publications and presentations.

### Authorship policy

Authorship will be determined according to the internationally agreed criteria for authorship ([www.icmje.org](http://www.icmje.org)). Authorship of parallel studies conducted outside of the main trial will be according to the individuals involved in the study but must acknowledge the contribution of the involved investigators.

**Document S2.** A list of recruiting sites and all contributors/collaborators

## A list of recruiting sites and all contributors and collaborators

### Contributors

| Prefix/First Name/Last Name                                            | Site Name                                |
|------------------------------------------------------------------------|------------------------------------------|
| Dr Tala Al-Dabbous<br>Dr Huda Alfoudri<br>Dr Mohammed Shamsah          | Al Adan Hospital                         |
| Dr Subbarao Elapavaluru<br>Ashley Berg<br>Christina Horn               | Allegheny General Hospital               |
| Dr Stephan Schroll                                                     | Barmherzige Bruder Regensburg            |
| Dr Jorge Velazco<br>Wanda Fikes<br>Ludmyla Ploskanych                  | Baylor Scott & White Health - Temple     |
| Dr Dan Meyer<br>Maysoon Shalabi-McGuire<br>Trent Witt<br>Ashley Ehlers | Baylor University Medical Centre, Dallas |
| Dr Lorenzo Grazioli                                                    | Bergamo Hospital                         |
| Dr E. Wilson Grandin<br>Jose Nunez<br>Tiago Reyes                      | Beth Israel Deaconess Medical Centre     |
| Dr Diarmuid O'Briain<br>Stephanie Hunter                               | Box Hill Hospital                        |
| Dr Mahesh Ramanan<br>Julia Affleck                                     | Caboolture Hospital                      |
| Dr Sumeet Rai<br>Josie Russell-Brown<br>Mary Nourse                    | Canberra Hospital                        |
| Dr Mark Joseph                                                         | Carilion Clinic                          |



|                                                                                                                                               |                                                                                                       |
|-----------------------------------------------------------------------------------------------------------------------------------------------|-------------------------------------------------------------------------------------------------------|
| Dr Brook Mitchell<br>Martha Tenzer                                                                                                            |                                                                                                       |
| Dr Ryuzo Abe                                                                                                                                  | Chiba University Graduate School of Medicine                                                          |
| Dr Hwa Jin Cho<br>Dr In Seok Jeong                                                                                                            | Chonnam National University Hospital                                                                  |
| Dr Nicolas Brozzi                                                                                                                             | Cleveland Clinic - Florida                                                                            |
| Omar Mehkri                                                                                                                                   | Cleveland Clinic - Ohio                                                                               |
| Dr Jerónimo Graf                                                                                                                              | Clinica Alemana De Santiago                                                                           |
| Dr Roderigo Diaz<br>Camila Delgado<br>Joyce González<br>Maria Soledad Sanchez                                                                 | Clinica Las Condez                                                                                    |
| Dr Diego Fernando Bautista Rincón<br>Melissa Bustamante Duque<br>Dr Angela Maria Marulanda Yanten                                             | Clinica Valle de Lilli                                                                                |
| Dr Daniel Brodie                                                                                                                              | Medical ICU, Columbia College of Physicians and Surgeons, New-York-Presbyterian Hospital, NY, NY, USA |
| Dr Desy Rusmawatingtyas                                                                                                                       | Dr Sardjito Hospital (Paediatrics)                                                                    |
| Gabrielle Ragazzo                                                                                                                             | Emory University Healthcare System                                                                    |
| Dr Azhari Taufik<br>Dr Margaretha Gunawan<br>Dr Vera Irawany<br>Muhammad Rayhan<br>Dr Elizabeth Yasmin Wardoyo<br>Dr Nurindah S Trisnaningrum | Fatmawati Hospital                                                                                    |
| Dr Mauro Panigada<br>Dr Silvia Coppola<br>Dr Sebastiano Colombo<br>Dr Giacomo Grasselli<br>Dr Michela Leone<br>Dr Alberto Zanella             | Fondazione IRCCS Policlinico of Milan (Fondazione IRCCS Ca' Granda Ospedale Maggiore Policlinico)     |
| Prof Massimo Antonelli<br>Dr Simone Carelli                                                                                                   | Fondazione Policlinico Universitario Agostino Gemelli IRCCS                                           |

|                                                                                                                                                                    |                                                                 |
|--------------------------------------------------------------------------------------------------------------------------------------------------------------------|-----------------------------------------------------------------|
| Domenico L. Grieco                                                                                                                                                 |                                                                 |
| Motohiro Asaki                                                                                                                                                     | Fujieda Municipal General Hospital                              |
| Dr Kota Hoshino                                                                                                                                                    | Fukuoka University                                              |
| Dr Leonardo Salazar<br>Laura Duarte                                                                                                                                | Fundación Cardiovascular de Colombia                            |
| Prof John Laffey<br>Dr Bairbre McNicholas<br>Dr David Cosgrave                                                                                                     | Galway University Hospitals                                     |
| Dr Joseph McCaffrey<br>Allison Bone                                                                                                                                | Geelong Hospital                                                |
| Dr James Winearls<br>Mandy Tallott                                                                                                                                 | Gold Coast University Hospital                                  |
| Dr David Thomson<br>Dr Christel Arnold-Day<br>Jerome Cupido<br>Zainap Fanie<br>Dr Malcom Miller<br>Dr Lisa Seymore<br>Dawid van Straaten                           | Groote Schuur Hospital                                          |
| Dr Ibrahim Hassan<br>Dr Ali Ait Hssain<br>Jeffrey Aliudin<br>Al-Reem Alqahtani<br>Khoulod Mohamed<br>Ahmed Mohamed<br>Darwin Tan<br>Joy Villanueva<br>Ahmed Zaqout | Hamad General Hospital - Weill Cornell Medical College in Qatar |
| Dr Ethan Kurtzman<br>Arben Ademi<br>Ana Dobrita<br>Khadija El Aoudi                                                                                                | Hartford HealthCare                                             |

|                                                                                           |                                                  |
|-------------------------------------------------------------------------------------------|--------------------------------------------------|
| Juliet Segura                                                                             |                                                  |
| Dr Gezy Giwangkancana                                                                     | Hasan Sadikin Hospital (Adult)                   |
| Dr Shinichiro Ohshimo                                                                     | Hiroshima University                             |
| Dr Koji Hoshino<br>Saito Hitoshi                                                          | Hokkaido University Hospital                     |
| Dr Javier Osatnik                                                                         | Hospital Alemán                                  |
| Dr Anne Joosten                                                                           | Hospital Civil Marie Curie                       |
| Dr Antoni Torres<br>Ana Motos<br>Dr Minlan Yang                                           | Hospital Clinic, Barcelona                       |
| Dr Carlos Luna                                                                            | Hospital de Clínicas                             |
| Francisco Arancibia                                                                       | Hospital del Tórax                               |
| Virginie Williams<br>Alexandre Noel                                                       | Hospital du Sacre Coeur (Universite de Montreal) |
| Dr Nestor Luque                                                                           | Hospital Emergencia Ate Vitarte                  |
| Dr Trieu Huynh Trung<br>Sophie Yacoub                                                     | Hospital for Tropical Diseases                   |
| Marina Fantini                                                                            | Hospital Mater Dei                               |
| Dr Ruth Noemi Jorge García<br>Dr Enrique Chicote Alvarez                                  | Hospital Nuestra Señora de Gracia                |
| Dr Anna Greti                                                                             | Hospital Puerta de Hierro                        |
| Dr Adrian Ceccato                                                                         | Hospital Universitari Sagrat Cor                 |
| Dr Angel Sanchez                                                                          | Hospital Universitario Sant Joan d'Alacant       |
| Dr Ana Loza Vazquez                                                                       | Hospital Universitario Virgen de Valme           |
| Dr Ferran Roche-Campo                                                                     | Hospital Verge de la Cinta de Tortosa            |
| Dr Divina Tuazon                                                                          | Houston Methodist Hospital                       |
| Marcelo Amato<br>Luciana Cassimiro<br>Flavio Pola<br>Francis Ribeiro<br>Guilherme Fonseca | INCOR (Universidade de São Paulo)                |

|                                                                                                                                                                    |                                                                                   |
|--------------------------------------------------------------------------------------------------------------------------------------------------------------------|-----------------------------------------------------------------------------------|
| Dr Heidi Dalton<br>Dr Mehul Desai<br>Dr Erik Osborn<br>Hala Deeb                                                                                                   | INOVA Fairfax Hospital                                                            |
| Dr Antonio Arcadipane<br>Claudia Bianco<br>Raffaele Cuffaro<br>Gennaro Martucci<br>Giovanna Panarello<br>Giovanna Occhipinti<br>Matteo Rossetti<br>Chiara Vitiello | ISMETT                                                                            |
| Dr Sung-Min Cho                                                                                                                                                    | Johns Hopkins                                                                     |
| Dr Hiroaki Shimizu<br>Dr Naoki Moriyama                                                                                                                            | Kakogawa Acute Care Medical Center                                                |
| Dr Jae-Burm Kim                                                                                                                                                    | Keimyung University Dong San Hospital                                             |
| Dr Nobuya Kitamura                                                                                                                                                 | Kimitsu Chuo Hospital                                                             |
| Dr Alyaa Elhazmi<br>Dr Abdullah Al-Hudaib                                                                                                                          | King Faisal Specialist Hospital and Research Center                               |
| Dr Johannes Gebauer                                                                                                                                                | Klinikum Passau                                                                   |
| Dr Toshiki Yokoyama                                                                                                                                                | Kouritu Tousei Hospital                                                           |
| Dr Abdulrahman Al-Fares<br>Esam Alamad<br>Fatma Alawadhi<br>Kalthoum Alawadi<br>Dr Sarah Buabbas                                                                   | Al-Amiri and Jaber Al-Ahmed Hospitals, Kuwait Extracorporeal Life Support Program |
| Dr Hiro Tanaka                                                                                                                                                     | Kyoto Medical Centre                                                              |
| Dr Satoru Hashimoto<br>Masaki Yamazaki                                                                                                                             | Kyoto Prefectural University of Medicine                                          |
| Tak-Hyuck Oh                                                                                                                                                       | Kyung Pook National University Chilgok Hospital                                   |
| Dr Mark Epler<br>Dr Cathleen Forney                                                                                                                                | Lancaster General Health                                                          |

|                                                                                                                                                                          |                                                             |
|--------------------------------------------------------------------------------------------------------------------------------------------------------------------------|-------------------------------------------------------------|
| Jared Feister<br>Katherine Grobengieser<br>Louise Kruse<br>Joelle Williamson                                                                                             |                                                             |
| Dr Eric Gnall<br>Dr Mara Caroline<br>Sasha Golden<br>Colleen Karaj<br>Sherry McDermott<br>Lynn Sher<br>Dr Timothy Shapiro<br>Lisa Thome<br>Mark Vanderland<br>Mary Welch | Lankenau Institute of Medical Research (Main Line Health)   |
| Dr Matthew Brain<br>Sarah Mineall                                                                                                                                        | Launceston General Hospital                                 |
| Prof Luca Brazzi<br>Dr Gabriele Sales                                                                                                                                    | Le Molinette Hospital (Ospedale Molinette Torino)           |
| Dr Tawnya Ogston                                                                                                                                                         | Legacy Emanuel Medical Center                               |
| Dr Dave Nagpal<br>Karlee Fischer                                                                                                                                         | London Health Sciences Centre                               |
| Dr Roberto Lorusso                                                                                                                                                       | Maastricht University Medical Centre                        |
| Prof Mariano Esperatti                                                                                                                                                   | Mar del Plata Medical Foundation Private Community Hospital |
| Dr Diarmuid O'Briain                                                                                                                                                     | Maroondah Hospital                                          |
| Dr Edmund G. Carton                                                                                                                                                      | Mater Misericordiae University Hospital                     |
| Ayan Sen<br>Amanda Palacios<br>Deborah Rainey                                                                                                                            | Mayo Clinic College of Medicine                             |
| Cassandra Seefeldt<br>Dr Lucia Durham<br>Dr Octavio Falcucci<br>Amanda Emmrich                                                                                           | Medical College of Wisconsin (Froedtert Hospital)           |

|                                                                                                                        |                                                                 |
|------------------------------------------------------------------------------------------------------------------------|-----------------------------------------------------------------|
| Jennifer Guy<br>Carling Johns<br>Emily Neumann                                                                         |                                                                 |
| Dr Nina Buchtele<br>Dr Michael Schwameis                                                                               | Medical University of Vienna                                    |
| Dr Stephanie-Susanne Stecher<br>Delila Singh<br>Dr Michaela Barnikel<br>Lukas Arenz                                    | Medical Department II, LMU Hospital Munich                      |
| Dr Akram Zaaqoq<br>Lan Anh Galloway<br>Caitlin Merley                                                                  | MedStar Washington Hospital Centre                              |
| Prof Alistair Nichol                                                                                                   | Monash University                                               |
| Dr Marc Csete<br>Luisa Quesada<br>Isabela Saba                                                                         | Mount Sinai Medical Centre                                      |
| Dr Daisuke Kasugai<br>Hiroaki Hiraiwa<br>Taku Tanaka                                                                   | Nagoya University Hospital                                      |
| Dr Eva Marwali<br>Yoel Purnama<br>Dr Santi Rahayu Dewayanti<br>Dr Ardiyan<br>Dr Dafsah Arifa Juzar<br>Dr Debby Siagian | National Cardiovascular Center Harapan Kita, Jakarta, Indonesia |
| Yih-Sharng Chen                                                                                                        | National Taiwan University Hospital                             |
| Dr Mark Ogino                                                                                                          | Nemours Alfred I duPont Hospital for Children                   |
| Dr Indrek Ratsep<br>Lauri Enneveer<br>Kristo Erikson<br>Dr Getter Oigus<br>Andra-Maris Post                            | North Estonia Medical Centre                                    |

|                                                                                                                                                                                        |                                                            |
|----------------------------------------------------------------------------------------------------------------------------------------------------------------------------------------|------------------------------------------------------------|
| Piret Sillaots                                                                                                                                                                         |                                                            |
| Frank Manetta                                                                                                                                                                          | Northwell Health                                           |
| Mamoru Komats                                                                                                                                                                          | Obihiro-Kosei General Hospital                             |
| Dr S. Veena Satyapriya<br>Dr Amar Bhatt<br>Marco Echeverria<br>Juan Fiorda<br>Alicia Gonzalez<br>Dr Nahush A. Mokadam<br>Johnny McKeown<br>Joshua Pasek<br>Haixia Shi<br>Alberto Uribe | Ohio State University Medical Centre                       |
| Dr Rita Moreno                                                                                                                                                                         | Oklahoma Heart Institute                                   |
| Bishoy Zakhary                                                                                                                                                                         | Oregon Health and Science University Hospital (OHSU)       |
| Dr Marco Cavana<br>Dr Alberto Cucino                                                                                                                                                   | Ospedale di Arco (Trento hospital)                         |
| Prof Giuseppe Foti<br>Dr Marco Giani<br>Dr Vincenzo Russotto                                                                                                                           | Ospedale San Gerardo                                       |
| Prof Davide Chiumello<br>Valentina Castagna                                                                                                                                            | Ospedale San Paolo                                         |
| Dr Andrea Dell'Amore                                                                                                                                                                   | Padua University Hospital (Policlinico of Padova)          |
| Dr Hoi-Ping Shum                                                                                                                                                                       | Pamela Youde Nethersole Eastern Hospital                   |
| Dr Alain Vuysteke                                                                                                                                                                      | Papworth Hospitals NHS Foundation Trust                    |
| Dr Asad Usman<br>Andrew Acker<br>Blake Mergler<br>Nicolas Rizer<br>Federico Sertic<br>Benjamin Smood<br>Alexandra Sperry                                                               | Penn Medicine (Hospital of the University of Pennsylvania) |

|                                                                                                                  |                                                                           |
|------------------------------------------------------------------------------------------------------------------|---------------------------------------------------------------------------|
| Dr Madhu Subramanian                                                                                             |                                                                           |
| Dr Erlina Burhan<br>Dr Navy Lolong<br>Dr Ernita Akmal<br>Prof Menaldi Rasmin<br>Bhat Naivedh<br>Dr Faya Sitompul | Persahabatan General Hospital                                             |
| Dr Peter Barrett<br>Julia Daugherty<br>Dr David Dean                                                             | Piedmont Atlanta Hospital                                                 |
| Dr Antonio Loforte                                                                                               | Policlinico di S. Orsola, Università di Bologna                           |
| Dr Irfan Khan<br>Olivia DeSantis<br>Dr Mohammed Abraar Quraishi                                                  | Presbyterian Hospital Services, Albuquerque                               |
| Dr Dominic So<br>Darshana Kandamby                                                                               | Princess Margaret Hospital                                                |
| Dr Jose M. Mandei<br>Hans Natanael                                                                               | Prof Dr R. D. Kandou General Hospital - Paediatric                        |
| Eka YudhaLantang<br>Anastasia Lantang                                                                            | Prof Dr R. D. Kandou General Hospital - Adult                             |
| Surya Oto Wijaya                                                                                                 | Prof D Sulianti Saroso Hospital                                           |
| Anna Jung                                                                                                        | Providence Saint John's Health Centre                                     |
| George Ng<br>Dr Wing Yiu Ng                                                                                      | Queen Elizabeth Hospital, Hong Kong                                       |
| Dr Pauline Yeung                                                                                                 | The University of Hong Kong                                               |
| Dr Alexis Tabah<br>Megan Ratcliffe<br>Maree Duroux                                                               | Redcliffe Hospital                                                        |
| Dr Shingo Adachi<br>Dr Shota Nakao                                                                               | Rinku general medical center (and Senshu trauma and critical care center) |
| Dr Pablo Blanco<br>Ana Prieto                                                                                    | Rio Hortega University Hospital                                           |



|                                                                                                            |                                                                   |
|------------------------------------------------------------------------------------------------------------|-------------------------------------------------------------------|
| Jesús Sánchez                                                                                              |                                                                   |
| Dr Meghan Nicholson                                                                                        | Rochester General Hospital                                        |
| Dr Warwick Butt<br>Alyssa Serratore<br>Carmel Delzoppo                                                     | Royal Children's Hospital                                         |
| Dr Pierre Janin<br>Elizabeth Yarad                                                                         | Royal North Shore Hospital                                        |
| Dr Richard Totaro<br>Jennifer Coles                                                                        | Royal Prince Alfred Hospital                                      |
| Robert Balk<br>Samuel Fox<br>James Hays<br>Esha Kapania<br>Pavel Mishin<br>Andy Vissing<br>Garrett Yantosh | Rush University, Chicago                                          |
| Dr Saptadi Yulianto<br>Dr Kohar Hari Santoso<br>Dr Susanthi Djajalaksana                                   | Saiful Anwar Malang Hospital (Brawijaya University) (Paediatrics) |
| Dr Arie Zainul Fatoni                                                                                      | Saiful Anwar Malang Hospital (Brawijaya University) (Adult)       |
| Dr Masahiro Fukuda                                                                                         | Saiseikai Senri Hospital                                          |
| Prof Keibun Liu                                                                                            | Saiseikai Utsunomiya Hospital                                     |
| Prof Paolo Pelosi<br>Dr Denise Battaglini                                                                  | San Martino Hospital                                              |
| Dr Juan Fernando Masa Jiménez                                                                              | San Pedro de Alcantara Hospital                                   |
| Dr Sérgio Gaião                                                                                            | São João Hospital Centre, Porto                                   |
| Jessica Buchner                                                                                            | Sentara Norfolk General Hospital                                  |
| Dr Su Hwan Lee                                                                                             | Severance Hospital                                                |
| Dr Tatsuya Kawasaki                                                                                        | Shizuoka Children's Hospital                                      |
| Dr Pranya Sakiyalak<br>Prompak Nitayavardhana                                                              | Siriraj Hospital                                                  |

|                                                                         |                                                             |
|-------------------------------------------------------------------------|-------------------------------------------------------------|
| Dr Tamara Seitz                                                         | Sozialmedizinisches Zentrum Süd - Kaiser-Franz-Josef-Spital |
| Rakesh Arora<br>David Kent                                              | St Boniface Hospital (University of Manitoba)               |
| Dr Swapnil Parwar<br>Andrew Cheng<br>Jennene Miller                     | St George Hospital                                          |
| Dr Shigeki Fujitani<br>Dr Naoki Shimizu                                 | St Marianna Medical University hospital                     |
| Dr Jai Madhok<br>Dr Clark Owyang                                        | Stanford University Hospital                                |
| Dr Hergen Buscher<br>Claire Reynolds                                    | St Vincent's Hospital                                       |
| Dr Olavi Maasikas<br>Dr Aleksandr Beljantsev<br>Vladislav Mihnovits     | Tartu University Hospital                                   |
| Dr Takako Akimoto<br>Mariko Aizawa<br>Dr Kanako Horibe<br>Ryota Onodera | Teine Keijinkai Hospital                                    |
| Prof Carol Hodgson<br>Dr Aidan Burrell<br>Meredith Young                | The Alfred Hospital                                         |
| Timothy Smith                                                           | The Christ Hospital                                         |
| Dr Timothy George                                                       | The Heart Hospital Baylor Plano, Plano                      |
| Dr Kiran Shekar<br>Niki McGuinness<br>Lacey Irvine                      | The Prince Charles Hospital                                 |
| Brigid Flynn                                                            | The University of Kansas Medical Centre                     |
| Dr Keiki Shimizu                                                        | Tokyo Metropolitan Medical Center                           |
| Dr Eddy Fan<br>Kathleen Exconde                                         | Toronto General Hospital                                    |
| Dr Shingo Ichiba                                                        | Tokyo Women's Medical University Hospital                   |

|                                                                                               |                                                                                                                             |
|-----------------------------------------------------------------------------------------------|-----------------------------------------------------------------------------------------------------------------------------|
| Leslie Lussier                                                                                | Tufts Medical Centre (and Floating Hospital for Children)                                                                   |
| Dr Gösta Lotz                                                                                 | Universitätsklinikum Frankfurt (University Hospital Frankfurt) (Uniklinik)                                                  |
| Dr Maximilian Malfertheiner<br>Esther Dreier<br>Dr Lars Maier                                 | Universitätsklinikum Regensburg (Klinik für Innere Medizin II)                                                              |
| Dr Neurinda Permata Kusumastuti                                                               | University Airlangga Hospital (Paediatric)                                                                                  |
| Dr Colin McCloskey<br>Dr Al-Awwab Dabaliz<br>Dr Tarek B Elshazly<br>Josiah Smith              | University Hospital Cleveland Medical Centre (UH Cleveland hospital)                                                        |
| Dr Konstanty S. Szuldrzynski<br>Dr Piotr Bielański                                            | University Hospital in Krakow                                                                                               |
| Dr Yusuff Hakeem                                                                              | University Hospitals of Leicester NHS Trust (Glenfield Hospital)                                                            |
| Dr Keith Wille                                                                                | University of Alabama at Birmingham Hospital (UAB)                                                                          |
| A/Prof Srinivas Murthy                                                                        | University of British Columbia                                                                                              |
| Dr Ken Kuljit S. Parhar<br>Dr Kirsten M. Fiest<br>Cassidy Codan<br>Anmol Shahid               | University of Calgary (Peter Lougheed Centre, Foothills Medical Centre, South Health Campus and Rockyview General Hospital) |
| Dr Mohamed Fayed<br>Dr Timothy Evans<br>Rebekah Garcia<br>Ashley Gutierrez<br>Hiroaki Shimizu | University of California, San Francisco-Fresno Clinical Research Centre                                                     |
| Dr Tae Song<br>Rebecca Rose                                                                   | University of Chicago                                                                                                       |
| Dr Suzanne Bennett<br>Denise Richardson                                                       | University of Cincinnati Medical Centre                                                                                     |
| Dr Giles Peek                                                                                 | University of Florida                                                                                                       |
| Dr Lovkesh Arora<br>Kristina Rappaport<br>Kristina Rudolph                                    | University of Iowa                                                                                                          |

|                                                                                                                                                                  |                                                            |
|------------------------------------------------------------------------------------------------------------------------------------------------------------------|------------------------------------------------------------|
| Zita Sibenaller<br>Lori Stout<br>Alicia Walter                                                                                                                   |                                                            |
| Dr Daniel Herr<br>Nazli Vedadi                                                                                                                                   | University of Maryland - Baltimore                         |
| Prof Robert Bartlett                                                                                                                                             | University of Michigan Medical Center                      |
| Prof Antonio Pesenti                                                                                                                                             | University of Milan                                        |
| Dr Lace Sindt<br>Cale Ewald<br>Julie Hoffman<br>Sean Rajnic<br>Shaun Thompson                                                                                    | University of Nebraska Medical Centre                      |
| Dr Ryan Kennedy                                                                                                                                                  | University of Oklahoma Health Sciences Centre (OU)         |
| Dr Matthew Griffee<br>Dr Anna Ciullo<br>Yuri Kida                                                                                                                | University of Utah Hospital                                |
| Dr Ricard Ferrer Roca<br>Cynthia Alegre<br>Dr Sofia Contreras<br>Dr Jordi Riera                                                                                  | Vall d'Hebron University Hospital, Barcelona               |
| Dr Christy Kay<br>Irene Fischer<br>Elizabeth Renner                                                                                                              | Washington University in St. Louis/ Barnes Jewish Hospital |
| Dr Hayato Taniguci                                                                                                                                               | Yokohama City University Medical Center                    |
| Prof John Fraser<br>A/Prof Gianluigi Li Bassi<br>Dr Jacky Suen<br>Prof Adrian Barnett<br>Dr Nicole White<br>Dr Kristen Gibbons<br>Simon Forsyth<br>Amanda Corley | COVID-19 Critical Care Consortium                          |

|                                                                                                                                                                                                                                                                                                                                                                                   |                                                                                                 |
|-----------------------------------------------------------------------------------------------------------------------------------------------------------------------------------------------------------------------------------------------------------------------------------------------------------------------------------------------------------------------------------|-------------------------------------------------------------------------------------------------|
| <p>India Pearse<br/> Samuel Hinton<br/> Gabriella Abbate<br/> Halah Hassan<br/> Dr Silver Heinsar<br/> Varun A Karnik<br/> Dr Katrina Ki<br/> Hollier F. O'Neill<br/> Dr Nchafatso Obonyo<br/> Dr Leticia Pretti Pimenta<br/> Janice D. Reid<br/> Dr Kei Sato<br/> Dr Kiran Shekar<br/> Aapeli Vuorinen<br/> Dr Karin S. Wildi<br/> Emily S. Wood<br/> Dr Stephanie Yerkovich</p> |                                                                                                 |
| <p>James Lee<br/> Daniel Plotkin<br/> Barbara Wanjiru Citarella<br/> Laura Merson</p>                                                                                                                                                                                                                                                                                             | <p>ISARIC, Centre for Tropical Medicine and Global Health, University of Oxford, Oxford, UK</p> |

**Collaborators**

| Prefix/First Name/Last Name | Site Name                                             |
|-----------------------------|-------------------------------------------------------|
| Dr Emma Hartley             | Aberdeen Royal Infirmary (Foresterhill Health Campus) |

|                                        |                                                     |
|----------------------------------------|-----------------------------------------------------|
| Bastian Lubis                          | Adam Malik Hospital                                 |
| Takanari Ikeyama                       | Aichi Childrens Health and Medical Center           |
| Balu Bhaskar                           | American Hospital                                   |
| Dr Jae-Seung Jung                      | Anam Korea University Hospital                      |
| Sandra Rossi Marta<br>Fabio Guarracino | Azienda Ospedaliero Universitaria Parma             |
| Prof Fabio Guarracino                  | Azienda Ospedaliero Universitaria Pisana            |
| Stacey Gerle                           | Banner University Medical Centre                    |
| Emily Coxon                            | Baptist Health Louisville                           |
| Dr Bruno Claro                         | Barts Hospital                                      |
| Dr. Gonzo Gonzalez-Stawinski           | Baylor All Saints Medical Centre, Forth Worth       |
| Daniel Loverde                         | Billings Clinic                                     |
| Dr Vieri Parrini                       | Borgo San Lorenzo Hospital                          |
| Dr Angela McBride                      | Brighton and Sussex Medical School                  |
| Kathryn Negaard<br>Dr Phillip Mason    | Brooke Army Medical Centre                          |
| Dr Angela Ratsch                       | Bundaberg Hospital                                  |
| Ahmad Abdelaziz                        | Cairo University Hospital                           |
| Juan David Uribe                       | Cardio VID                                          |
| Dr Adriano Peris                       | Careggi Hospital                                    |
| Mark Sanders                           | Cedar Park Regional Medical Center                  |
| Dominic Emerson                        | Cedars-Sinai Medical Centre                         |
| Prof Pedro Pova                        | Centro Hospitalar de Lisboa                         |
| Dr Roland Francis                      | Charite-Universitätsmedizin Berlin                  |
| Ali Cherif                             | Charles Nicolle University Hospital                 |
| Dr Sunimol Joseph                      | Children's Health Ireland (CHI) at Crumlin          |
| Dr Matteo Di Nardo                     | Children's Hospital Bambino Gesù                    |
| Micheal Heard                          | Children's Healthcare of Atlanta- Egleston Hospital |
| Kimberly Kyle                          | Children's Hospital                                 |

|                                                         |                                                                        |
|---------------------------------------------------------|------------------------------------------------------------------------|
| Ray A Blackwell                                         | Christiana Care Health System's Centre for Heart and Vascular Health   |
| Dr Michael Piagnerelli<br>Dr Patrick Biston             | CHU de Charleroi                                                       |
| Hye Won Jeong                                           | Chungbuk National University Hospital                                  |
| Reanna Smith                                            | Cincinnati Children's                                                  |
| Yogi Prawira                                            | Cipto Mangunkusumo Hospital                                            |
| Dr Giorgia Montrucchio                                  | Città della Salute e della Scienza Hospital – Turin, Italy             |
| Nadeem Rahman<br>Vivek Kakar                            | Cleveland Clinic, Abu Dhabi                                            |
| Dr Michael Piagnerelli<br>Dr Josefa Valenzuela Sarrazin | Clinica Las Condes                                                     |
| Dr Arturo Huerta Garcia                                 | Clínica Sagrada Família                                                |
| Dr Bart Meyns                                           | Collaborative Centre Department Cardiac Surgery, UZ Leuven             |
| Marsha Moreno                                           | Dignity Health Medical Group- Dominican                                |
| Rajat Walia                                             | Dignity Health St. Joseph's Hospital and Medical Center (SJHMC)        |
| Dr Annette Schweda                                      | Donaustauf hospital                                                    |
| Cenk Kirakli                                            | Dr. Suat Seren Chest Diseases and Surgery Practice and Training Centre |
| Estefania Giraldo                                       | Fundación Clínica Shaio (Shaio Clinic)                                 |
| Dr Wojtek Karolak                                       | Gdansk Medical University                                              |
| Dr Martin Balik                                         | General University Hospital                                            |
| Elizabeth Pocock                                        | George Washington University Hospital                                  |
| Evan Gajkowski                                          | Giesinger Medical Centre                                               |
| Kanamoto Masafumi                                       | Gunma University Graduate School of Medicine                           |
| Dr Nicholas Barrett                                     | Guy's and St Thomas NHS Foundation Trust Hospital                      |
| Yoshihiro Takeyama                                      | Hakodate City Hospital                                                 |
| Sunghoon Park                                           | Hallym University Sacred Heart Hospital                                |
| Faizan Amin                                             | Hamilton General Hospital                                              |
| Dr Fina Meilyana Andriyani                              | Hasan Sadikin Hospital (Paediatric)                                    |
| Dr Serhii Sudakevych                                    | Heart Institute Ministry of Health of Ukraine                          |

|                                                         |                                                                                      |
|---------------------------------------------------------|--------------------------------------------------------------------------------------|
| Dr Angela Ratsch                                        | Hervey Bay Hospital                                                                  |
| Patrícia Schwarz<br>Ana Carolina Mardini                | Hospital de Clínicas de Porto Alegre                                                 |
| Ary Serpa Neto                                          | Hospital Israelita Albert Einstein                                                   |
| Dr Andrea Villoldo                                      | Hospital Privado de Comunidad                                                        |
| Alexandre Siciliano Colafranceschi                      | Hospital Pro Cardíaco                                                                |
| Dr Alejandro Ubeda Iglesias                             | Hospital Punta de Europa                                                             |
| Livia Maria Garcia Melro<br>Giovana Fioravante Romualdo | Hospital Samaritano Paulista                                                         |
| Diego Gaia                                              | Hospital Santa Catarina                                                              |
| Helmngton Souza                                         | Hospital Santa Marta                                                                 |
| Dr Diego Bastos                                         | Hospital Cura D'ars Fortaleza                                                        |
| Filomena Galas                                          | Hospital Sirio Libanes                                                               |
| Dr Rafael Máñez Mendiluce                               | Hospital Universitario de Bellvitge                                                  |
| Alejandra Sosa                                          | Hospital Universitario Esperanza (Universidad Francisco Marroquin)                   |
| Dr Ignacio Martinez                                     | Hospital Universitario Lucus Augusti                                                 |
| Hiroshi Kurosawa                                        | Hyogo Prefectural Kobe Children's Hospital                                           |
| Juan Salgado                                            | Indiana University Health                                                            |
| Dr Beate Hugi-Mayr                                      | Inselspital University Hospital                                                      |
| Eric Charbonneau                                        | Institut Universitaire de Cardiologie et de Pneumologie de Quebec - Universite Laval |
| Vitor Salvatore Barzilai                                | Instituto de Cardiologia do Distrito Federal - ICDF                                  |
| Veronica Monteiro                                       | Instituto de Medicina Integral Prof. Fernando Figueira (IMIP)                        |
| Rodrigo Ribeiro de Souza                                | Instituto Goiano de Diagnostico Cardiovascular (IGDC)                                |
| Michael Harper                                          | INTEGRIS Baptist Medical Center                                                      |
| Hiroyuki Suzuki                                         | Japan Red Cross Maebashi Hospital                                                    |
| Celina Adams                                            | John C Lincoln Medical Centre                                                        |
| Dr Jorge Brieva                                         | John Hunter Hospital                                                                 |
| George Nyale                                            | Kenyatta National Hospital (KNH)                                                     |
| Jihan Fatani                                            | King Abdullah Medical City Specialist Hospital                                       |



|                                       |                                                          |
|---------------------------------------|----------------------------------------------------------|
| Dr Faisal Saleem Eltatar              |                                                          |
| Dr. Husam Baeissa                     | King Abdullah Medical Complex                            |
| Ayman AL Masri                        | King Salman Hospital NWF                                 |
| Yee Hui Mok                           | KK Women's and Children's Hospital                       |
| Masahiro Yamane                       | KKR Medical Center                                       |
| Hanna Jung                            | Kyung Pook National University Hospital                  |
| Rhonda Bakken                         | M Health Fairview                                        |
| Dr Tim Felton                         | Manchester University NHS Foundation Trust - Wythenshawe |
| Lorenzo Berra                         | Massachusetts General Hospital                           |
| Gordan Samoukoviv<br>Dr Josie Campisi | McGill University Health Centre                          |
| Bobby Shah                            | Medanta Hospital                                         |
| Arpan Chakraborty                     | Medica Super speciality Hospital                         |
| Monika Cardona                        | Medical University of South Carolina                     |
| Harsh Jain                            | Mercy Hospital of Buffalo                                |
| Dr Asami Ito                          | Mie University Hospital                                  |
| Brahim Housni                         | Mohammed VI University hospital                          |
| Sennen Low                            | National Centre for Infectious Diseases                  |
| Dr. Koji Iihara                       | National Cerebral and Cardiovascular Center              |
| Joselito Chavez                       | National Kidney and Transplant Institute                 |
| Dr Kollengode Ramanathan              | National University Hospital, Singapore                  |
| Gustavo Zabert                        | National University of Comahue                           |
| Krubin Naidoo                         | Nelson Mandela Children's Hospital                       |
| Dr Ian Seppelt                        | Nepean Hospital                                          |
| Marlice VanDyk<br>Sarah MacDonald     | Netcare Unitas ECMO Centre                               |
| Randy McGregor                        | Northwestern Medicine                                    |
| Teka Siebenaler                       | Norton Children's Hospital                               |
| Hannah Flynn                          | Novant Health (NH) Presbyterian Medical Centre           |

|                                       |                                                                          |
|---------------------------------------|--------------------------------------------------------------------------|
| Julia Garcia-Diaz<br>Catherine Harmon | Ochsner Clinic Foundation                                                |
| Kristi Lofton                         | Ochsner LSA Health Shreveport                                            |
| Toshiyuki Aokage                      | Okayama University Hospital                                              |
| Kazuaki Shigemitsu                    | Osaka City General Hospital                                              |
| Dr Andrea Moscatelli                  | Ospedale Gaslini                                                         |
| Dr Giuseppe Fiorentino                | Ospedali dei Colli                                                       |
| Dr Matthias Baumgaertel               | Paracelsus Medical University Nuremberg                                  |
| Serge Eddy Mba                        | Parirenyatwa General Hospital                                            |
| Jana Assy                             | Pediatric and Neonatal Cardiac intensive care at the American University |
| Holly Roush                           | Penn State Heath S. Hershey Medical Centre                               |
| Kay A Sichtung                        | Peyton Manning Children's Hospital                                       |
| Dr Francesco Alessandri               | Policlinico Umberto, Sapienza University of Rome                         |
| Debra Burns                           | Presbyterian Hospital, New York/ Weill Cornell Medical Centre            |
| Ahmed Rabie                           | Prince Mohammed bin Abdulaziz Hospital                                   |
| Dr Gavin Salt                         | Prince of Wales                                                          |
| Carl P. Garabedian                    | Providence Sacred Heart Children's Hospital                              |
| Dr Jonathan Millar<br>Dr Malcolm Sim  | Queen Elizabeth II University Hospital                                   |
| Dr Adrian Mattke                      | Queensland Children's Hospital                                           |
| Dr Danny McAuley                      | Queens University of Belfast                                             |
| Jawad Tadili                          | Rabat university hospital                                                |
| Dr Tim Frenzel                        | Radboud University Medical Centre                                        |
| Aaron Blandino Ortiz                  | Ramón y Cajal University Hospital                                        |
| Jackie Stone                          | Rapha Medical Centre                                                     |
| Dr Antony Attokaran                   | Rockhampton Hospital                                                     |
| Dr Michael Farquharson                | Royal Adelaide Hospital                                                  |
| Dr Brij Patel                         | Royal Brompton & Harefield NHS Foundation Trust                          |
| Derek Gunning                         | Royal Columbian Hospital                                                 |

|                                                           |                                                   |
|-----------------------------------------------------------|---------------------------------------------------|
| Dr Kenneth Baillie                                        | Royal Infirmary Edinburgh                         |
| Dr Pia Watson                                             | Sahlgrenska University Hospital                   |
| Kenji Tamai                                               | Saiseikai Yokohamashi Tobu Hospital               |
| Dr Gede Ketut Sajinadiyasa<br>Dr Dyah Kanyawati           | Sanglah General Hospital                          |
| Marcello Salgado                                          | Santa Casa de Misericordia de Juiz de Fora        |
| Assad Sassine                                             | Santa Casa de Misericórdia de Vitoria             |
| Dr Bhirowo Yudo                                           | Sardjito Hospital                                 |
| Scott McCaul                                              | Scripps Memorial Hospital La Jolla                |
| Bongjin Lee                                               | Seoul National University Children's Hospital     |
| Dr Young-Jae Cho<br>Dr Sang Min Lee                       | Seoul National University Hospital                |
| Yoshiaki Iwashita                                         | Shimane University Hospital                       |
| Laveena munshi                                            | Sinai Health Systems (Mount Sinai Hospital)       |
| Dr Neurinda Permata Kusumastuti<br>Dr Bambang Pujo Semedi | Soetomo General Hospital (FK UNAIR)               |
| Dr Nicole Van Belle                                       | St. Antonius Hospital                             |
| Daniel Marino                                             | St. Christopher's Hospital for Children           |
| Ignacio Martin-Loeches                                    | St James's University Hospital                    |
| Dr Hergen Buscher                                         | St Vincent's Hospital, Sydney                     |
| Dr Lenny Ivatt                                            | Swansea Hospital                                  |
| Chia Yew Woon                                             | Tan Tock Seng Hospital                            |
| Hyun Mi Kang                                              | The Catholic University of Seoul St Mary Hospital |
| Erskine James                                             | The Medical Centre Navicent Health                |
| Nawar Al-Rawas                                            | Thomas Jefferson University Hospital              |
| Tomoyuki Endo                                             | Tohoku Medical and Pharmaceutical University      |
| Dr Yudai Iwasaki                                          | Tohoku University                                 |
| Kenny Chan King-Chung                                     | Tuen Mun Hospital                                 |
| Dr Vadim Gudzenko                                         | UCLA Medical Centre (Ronald Regan)                |

|                             |                                                                           |
|-----------------------------|---------------------------------------------------------------------------|
| Dr Beate Hugi-Mayr          | Universitätsspital Bern, Universitätsklinik für Herz- und Gefässchirurgie |
| Dr Fabio Taccone            | Universite Libre de Bruxelles                                             |
| Dr Fajar Perdhana           | University Airlangga Hospital (Adult)                                     |
| Yoan Lamarche               | University de Montreal (Montreal Heart Institute)                         |
| Dr Joao Miguel Ribeiro      | University Hospital CHLN                                                  |
| Dr Nikola Bradic            | University Hospital Dubrava                                               |
| Dr Klaartje Van den Bossche | University Hospital Leuven                                                |
| Gurmeet Singh               | University of Alberta (Mazankowski Heart Institute)                       |
| Dr Gerdy Debeuckelaere      | University of Antwerp                                                     |
| Dr Henry T. Stelfox         | University of Calgary and Alberta Health Services                         |
| Cassia Yi                   | University of California at San Diego                                     |
| Jennifer Elia               | University of California, Irvine                                          |
| Shu Fang                    | University of Hong Kong                                                   |
| Thomas Tribble              | University of Kentucky Medical Center                                     |
| Shyam Shankar               | University of Missouri                                                    |
| Dr Paolo Navalesi           | University of Padova                                                      |
| Raj Padmanabhan             | University of Pittsburgh Medical Centre                                   |
| Bill Hallinan               | University of Rochester Medical Centre (UR Medicine)                      |
| Luca Paoletti               | University of South Carolina                                              |
| Yolanda Leyva               | University of Texas Medical Branch                                        |
| Tatuma Fykuda               | University of the Ryukyus                                                 |
| Jillian Koch                | University of Wisconsin & American Family Children's Hospital             |
| Amy Hackman                 | UT Southwestern                                                           |
| Lisa Janowaik               | UTHealth (University of Texas)                                            |
| Jennifer Osofsky            | Vassar Brothers Medical Center (VBMC)                                     |
| A/Prof Katia Donadello      | Verona Integrated University Hospital                                     |
| Josh Fine                   | WellSpan Health - York Hospital                                           |
| Dr Benjamin Davidson        | Westmead Hospital                                                         |
| Andres Oswaldo Razo Vazquez | Yale New Haven Hospital                                                   |

**Document S3.** Case report form regarding demographics, comorbidities, medications, laboratory values, complications, and outcomes

## COVID-19 CORE CASE REPORT FORM

### ACUTE RESPIRATORY INFECTION CLINICAL CHARACTERISATION DATA TOOL

#### DESIGN OF THIS CASE REPORT FORM (CRF)

This CRF is set up in modules to be used for recording data on the ISARIC\_nCov Core Database or for independent studies.

**Module 1 and Module 2** complete on the first day of presentation/admission or on first day of COVID-19 assessment.

**Module 2** also complete on first day of admission to ICU or high dependency unit. In addition, complete daily for as many days as resources allow up to a maximum of 14 days. Continue to follow-up patients who transfer between wards.

**Module 3 (Outcome)** complete at discharge or death

#### GENERAL GUIDANCE

- The CRF is designed to collect data obtained through examination, interview and review of hospital notes. Data may be collected prospectively or retrospectively if the patient is enrolled after the admission date.
- Participant Identification Numbers consist of a 5 digit site code and a 4 digit participant number. You can obtain a site code and registering on the data management system by contacting [ncov@isaric.org](mailto:ncov@isaric.org). Participant numbers should be assigned sequentially for each site beginning with 0001. In the case of a single site recruiting participants on different wards, or where it is otherwise difficult to assign sequential numbers, it is acceptable to assign numbers in blocks or incorporating alpha characters. E.g. Ward X will assign numbers from 0001 or A001 onwards and Ward Y will assign numbers from 5001 or B001 onwards. Enter the Participant Identification Number at the top of every page.
- Printed paper CRFs may be used for later transfer of the data onto the electronic database.
- For participants who return for re-admission to the same site, **start a new form with the same Participant Identification Number**. Please check “YES-admitted previously” in the ONSET & ADMISSION section. Enter as 2 separate entries in the electronic database.
- For participants who transfer between two sites that are both collecting data on this form, it is preferred to have the data entered 2 by a single site as a single admission, under the same Participant Identification Number. When this is not possible, the first site should record “Transfer to other facility” as an OUTCOME, and the second site should start a new form with a new patient number and indicate “YES-transferred” in ONSET & ADMISSION.
- Complete every line of every section, except where the instructions say to skip a section based on a response.
- Selections with circles (●) are single selection answers (choose one answer only). Selections with square boxes (□) are multiple selection answers (choose as many answers as are applicable).
- Mark ‘Not done’ for any results of laboratory values that are not available, not applicable or unknown.
- Avoid recording data outside of the dedicated areas. Sections are available for recording additional information.
- If using paper CRFs, we recommend writing clearly in ink, using BLOCK-CAPITAL LETTERS.
- Place an (X) when you choose the corresponding answer. To make corrections, strike through (-----) the data you wish to delete and write the correct data above it. Please initial and date all corrections.
- Please keep all of the sheets for a single participant together e.g. with a staple or participant-unique folder.
- Please transfer all paper CRF data to the electronic database. All paper CRFs needs to be stored locally, do not send any forms to us. Data are accepted only via secure electronic database.
- Please enter data on the electronic data capture system at <https://ncov.medsci.ox.ac.uk/>. If your site would like to collect data independently, we are happy to support the establishment of locally hosted databases.
- Please contact us at [ncov@isaric.org](mailto:ncov@isaric.org) if you need help with databases, if you have comments and to let us know that you are using the forms.

**MODULE 1: PRESENTATION/ADMISSION CASE REPORT FORM**
**CLINICAL INCLUSION CRITERIA**

 Suspected or confirmed novel coronavirus (COVID-19) infection:  YES  NO

**DEMOGRAPHICS**

Clinical centre name: \_\_\_\_\_ Country: \_\_\_\_\_

Enrolment date /first COVID-19 assessment date: [ \_ ] [ \_ ] [ \_ ] / [ \_ ] [ \_ ] [ \_ ] / [ \_ ] [ \_ ] [ \_ ] [ \_ ] [ \_ ] [ \_ ]

 Ethnic group (check all that apply):  Arab  Black  East Asian  South Asian  West Asian  Latin American  White

 Aboriginal/First Nations  Other: \_\_\_\_\_  Unknown

 Employed as a Healthcare Worker?  YES  NO  Unknown Employed in a microbiology laboratory?  YES  NO  Unknown

 Sex at Birth:  Male  Female  Not specified/Unknown Age [ \_ ] [ \_ ] [ \_ ] years OR [ \_ ] [ \_ ] months

 Pregnant?  YES  NO  Unknown If YES: Gestational weeks assessment: [ \_ ] [ \_ ] weeks

 POST PARTUM?  YES  NO  Unknown (if NO or Unknown skip this section)

 Pregnancy Outcome:  Live birth  Still birth Delivery date: [ \_ ] [ \_ ] [ \_ ] / [ \_ ] [ \_ ] [ \_ ] / [ \_ ] [ \_ ] [ \_ ] [ \_ ] [ \_ ] [ \_ ]

 Baby tested for COVID-19/SARS-CoV-2 infection?  YES  NO  Unknown

 If YES, result of test:  Positive  Negative  Unknown (If Positive, complete a separate CRF for baby)

 INFANT – Less than 1 year old?  YES  NO (If NO skip this section)

 Birth weight: [ \_ ] [ \_ ] . [ \_ ] kg or  lbs  Unknown

 Gestational outcome:  Term birth (≥37wk GA)  Preterm birth (<37wk GA)  Unknown

 Breastfed?  YES-currently breastfeeding  YES-breastfeeding discontinued  NO  Unknown

 Vaccinations appropriate for age/country?  YES  NO  Unknown

**ONSET & ADMISSION**

Onset date of first/earliest symptom: [ \_ ] [ \_ ] [ \_ ] / [ \_ ] [ \_ ] [ \_ ] / [ \_ ] [ \_ ] [ \_ ] [ \_ ] [ \_ ] [ \_ ]

Most recent presentation/admission date at this facility: [ \_ ] [ \_ ] [ \_ ] / [ \_ ] [ \_ ] [ \_ ] / [ \_ ] [ \_ ] [ \_ ] [ \_ ] [ \_ ] [ \_ ]

Was the patient admitted previously or transferred from any other facility during this illness episode?

 YES-admitted previously to this facility  YES-transferred from other facility  NO  Unknown

**SIGNS AND SYMPTOMS AT HOSPITAL ADMISSION (first available data at presentation/admission – within 24 hours)**

 Temperature: [ \_ ] [ \_ ] [ \_ ] . [ \_ ] °C or  °F

HR: [ \_ ] [ \_ ] [ \_ ] beats per minute

RR: [ \_ ] [ \_ ] breaths per minute

Systolic BP: [ \_ ] [ \_ ] [ \_ ] mmHg Diastolic BP: [ \_ ] [ \_ ] [ \_ ] mmHg

 Oxygen saturation: [ \_ ] [ \_ ] [ \_ ] % On:  Room air  Oxygen therapy  Unknown

 Sternal capillary refill time >2sec.  YES  NO  Unknown

Height: [ \_ ] [ \_ ] [ \_ ] cm

Weight: [ \_ ] [ \_ ] [ \_ ] kg

**MODULE 1: PRESENTATION/ADMISSION CASE REPORT FORM**

| <b>SIGNS AND SYMPTOMS ON ADMISSION</b> ( <i>Unk = Unknown</i> ) |                                                                                               |                                                    |                                                                              |
|-----------------------------------------------------------------|-----------------------------------------------------------------------------------------------|----------------------------------------------------|------------------------------------------------------------------------------|
| History of fever                                                | <input type="radio"/> YES <input type="radio"/> NO <input type="radio"/> Unk                  | Fatigue / Malaise                                  | <input type="radio"/> YES <input type="radio"/> NO <input type="radio"/> Unk |
| Cough                                                           | <input type="radio"/> YES-non-productive <input type="radio"/> YES-productive                 | Anorexia                                           | <input type="radio"/> YES <input type="radio"/> NO <input type="radio"/> Unk |
|                                                                 | <input type="radio"/> YES-with haemoptysis <input type="radio"/> NO <input type="radio"/> Unk | Altered consciousness/confusion                    | <input type="radio"/> YES <input type="radio"/> NO <input type="radio"/> Unk |
| Sore throat                                                     | <input type="radio"/> YES <input type="radio"/> NO <input type="radio"/> Unk                  | Muscle aches (myalgia)                             | <input type="radio"/> YES <input type="radio"/> NO <input type="radio"/> Unk |
| Runny nose (rhinorrhoea)                                        | <input type="radio"/> YES <input type="radio"/> NO <input type="radio"/> Unk                  | Joint pain (arthralgia)                            | <input type="radio"/> YES <input type="radio"/> NO <input type="radio"/> Unk |
| Wheezing                                                        | <input type="radio"/> YES <input type="radio"/> NO <input type="radio"/> Unk                  | Inability to walk                                  | <input type="radio"/> YES <input type="radio"/> NO <input type="radio"/> Unk |
| Shortness of breath                                             | <input type="radio"/> YES <input type="radio"/> NO <input type="radio"/> Unk                  | Abdominal pain                                     | <input type="radio"/> YES <input type="radio"/> NO <input type="radio"/> Unk |
| Lower chest wall indrawing                                      | <input type="radio"/> YES <input type="radio"/> NO <input type="radio"/> Unk                  | Diarrhoea                                          | <input type="radio"/> YES <input type="radio"/> NO <input type="radio"/> Unk |
| Chest pain                                                      | <input type="radio"/> YES <input type="radio"/> NO <input type="radio"/> Unk                  | Vomiting / Nausea                                  | <input type="radio"/> YES <input type="radio"/> NO <input type="radio"/> Unk |
| Conjunctivitis                                                  | <input type="radio"/> YES <input type="radio"/> NO <input type="radio"/> Unk                  | Skin rash                                          | <input type="radio"/> YES <input type="radio"/> NO <input type="radio"/> Unk |
| Lymphadenopathy                                                 | <input type="radio"/> YES <input type="radio"/> NO <input type="radio"/> Unk                  | Bleeding (Haemorrhage)<br>If YES, specify site(s): | <input type="radio"/> YES <input type="radio"/> NO <input type="radio"/> Unk |
| Headache                                                        | <input type="radio"/> YES <input type="radio"/> NO <input type="radio"/> Unk                  |                                                    |                                                                              |
| Loss of smell (Anosmia)                                         | <input type="radio"/> YES <input type="radio"/> NO <input type="radio"/> Unk                  | Other symptom(s)<br>If YES, specify:               | <input type="radio"/> YES <input type="radio"/> NO <input type="radio"/> Unk |
| Loss of taste (Ageusia)                                         | <input type="radio"/> YES <input type="radio"/> NO <input type="radio"/> Unk                  |                                                    |                                                                              |
| Seizures                                                        | <input type="radio"/> YES <input type="radio"/> NO <input type="radio"/> Unk                  |                                                    |                                                                              |

| <b>PRE-ADMISSION MEDICATION</b> ( <i>taken within 14 days of admission/presentation at healthcare facility</i> ) |                                                                                                |
|------------------------------------------------------------------------------------------------------------------|------------------------------------------------------------------------------------------------|
| Angiotensin converting enzyme inhibitors (ACE inhibitors)                                                        | <input type="radio"/> YES <input type="radio"/> NO <input type="radio"/> Unk                   |
| Angiotensin II receptor blockers (ARBs)                                                                          | <input type="radio"/> YES <input type="radio"/> NO <input type="radio"/> Unk                   |
| Non-steroidal anti-inflammatory (NSAIDs)                                                                         | <input type="radio"/> YES <input type="radio"/> NO <input type="radio"/> Unk                   |
| Oral steroids                                                                                                    | <input type="radio"/> YES <input type="radio"/> NO <input type="radio"/> Unk If YES, agent(s): |
| Other immunosuppressant agents (not oral steroids)                                                               | <input type="radio"/> YES <input type="radio"/> NO <input type="radio"/> Unk If YES, agent(s): |
| Antivirals                                                                                                       | <input type="radio"/> YES <input type="radio"/> NO <input type="radio"/> Unk If YES, agent(s): |
| Antibiotics                                                                                                      | <input type="radio"/> YES <input type="radio"/> NO <input type="radio"/> Unk If YES, agent(s): |
| Other targeted COVID-19 Medications                                                                              | <input type="radio"/> YES <input type="radio"/> NO <input type="radio"/> Unk If YES, agent(s): |

| <b>CO-MORBIDITIES AND RISK FACTORS</b> ( <i>existing prior to admission and ongoing</i> ) |                                                                              |                                                   |                                                                                                                            |
|-------------------------------------------------------------------------------------------|------------------------------------------------------------------------------|---------------------------------------------------|----------------------------------------------------------------------------------------------------------------------------|
| Chronic cardiac disease ( <i>not hypertension</i> )                                       | <input type="radio"/> YES <input type="radio"/> NO <input type="radio"/> Unk | Chronic hematologic disease                       | <input type="radio"/> YES <input type="radio"/> NO <input type="radio"/> Unk                                               |
| Hypertension                                                                              | <input type="radio"/> YES <input type="radio"/> NO <input type="radio"/> Unk | AIDS / HIV                                        | <input type="radio"/> YES-on ART <input type="radio"/> YES-not on ART <input type="radio"/> NO <input type="radio"/> Unk   |
| Chronic pulmonary disease ( <i>not asthma</i> )                                           | <input type="radio"/> YES <input type="radio"/> NO <input type="radio"/> Unk | Diabetes Mellitus                                 | <input type="radio"/> YES-Type 1 <input type="radio"/> YES -Type 2 <input type="radio"/> NO <input type="radio"/> Unk      |
| Asthma ( <i>physician diagnosed</i> )                                                     | <input type="radio"/> YES <input type="radio"/> NO <input type="radio"/> Unk | Rheumatologic disorder                            | <input type="radio"/> YES <input type="radio"/> NO <input type="radio"/> Unk                                               |
| Chronic kidney disease                                                                    | <input type="radio"/> YES <input type="radio"/> NO <input type="radio"/> Unk | Dementia                                          | <input type="radio"/> YES <input type="radio"/> NO <input type="radio"/> Unk                                               |
| Obesity ( <i>as defined by clinical staff</i> )                                           | <input type="radio"/> YES <input type="radio"/> NO <input type="radio"/> Unk | Tuberculosis                                      | <input type="radio"/> YES <input type="radio"/> NO <input type="radio"/> Unk                                               |
| Moderate or severe liver disease                                                          | <input type="radio"/> YES <input type="radio"/> NO <input type="radio"/> Unk | Malnutrition                                      | <input type="radio"/> YES <input type="radio"/> NO <input type="radio"/> Unk                                               |
| Mild liver disease                                                                        | <input type="radio"/> YES <input type="radio"/> NO <input type="radio"/> Unk | Smoking                                           | <input type="radio"/> YES <input type="radio"/> Never smoked <input type="radio"/> Former smoker <input type="radio"/> Unk |
| Asplenia                                                                                  | <input type="radio"/> YES <input type="radio"/> NO <input type="radio"/> Unk | Other relevant risk factor(s)<br>If YES, specify: | <input type="radio"/> YES <input type="radio"/> NO <input type="radio"/> Unk                                               |
| Chronic neurological disorder                                                             | <input type="radio"/> YES <input type="radio"/> NO <input type="radio"/> Unk |                                                   |                                                                                                                            |
| Malignant neoplasm                                                                        | <input type="radio"/> YES <input type="radio"/> NO <input type="radio"/> Unk |                                                   |                                                                                                                            |



## MODULE 2: DAILY CASE REPORT FORM

Complete on the day of admission or first COVID-19 investigation, and on the first day of ICU admission (if different from day of admission). In addition, depending on available resources, complete every day for a maximum of 14 days, or for days when biochemical results are available.

**SIGNS AND SYMPTOMS (Record the worst value between 00:00 to 24:00 on day of assessment)(worst=furthest from normal range)**
**DATE OF ASSESSMENT (DD/MM/YYYY):** [ ][ ][ ][ ][ ][ ][ ]/[ ][ ][ ][ ][ ][ ][ ]/[ ][ ][ ][ ][ ][ ][ ]

**Temperature:** [ ][ ][ ][ ] °C or [ ][ ][ ][ ] °F      **HR:** [ ][ ][ ][ ] beats per minute      **RR:** [ ][ ][ ][ ] breaths per minute

**Systolic BP:** [ ][ ][ ][ ] mmHg      **Diastolic BP:** [ ][ ][ ][ ] mmHg      **Oxygen saturation SaO<sub>2</sub>** [ ][ ][ ][ ] %

**Any supplemental oxygen: FiO<sub>2</sub> (0.21-1.0)** [ ][ ][ ][ ] or [ ][ ][ ][ ] % or [ ][ ][ ][ ] L/min

**Sternal capillary refill time >2seconds**    YES    NO    Unknown

**AVPU:** Alert [ ][ ] Verbal [ ][ ] Pain [ ][ ] Unresponsive [ ][ ]      **Glasgow Coma Score (GCS / 15)** [ ][ ][ ][ ]

**Is the patient currently receiving, or has received (between 00:00 to 24:00 on day of assessment)**
**High-flow nasal cannula oxygen therapy?**       YES    NO    Unknown

**Non-invasive ventilation (Any)?**  YES    NO    Unknown    **If YES:**  BIPAP    CPAP    Other    Unknown

**Invasive ventilation?**       YES    NO    Unknown

**Prone positioning?**       YES    NO    Unknown

**Inhaled Nitric Oxide?**       YES    NO    Unknown

**Tracheostomy inserted?**       YES    NO    Unknown

**Extra corporeal life support (ECLS/ ECMO)?**       YES    NO    Unknown    **If YES:**  VV    AV    Central    Unknown

**Renal replacement therapy (RRT) or dialysis?**    YES    NO    Unknown

**Any vasopressor/inotropic support?**  YES    NO    Unknown (if NO, select NO for the next 3 questions)

**Dopamine <5µg/kg/min OR Dobutamine OR milrinone OR levosimendan:**       YES    NO

**Dopamine 5-15µg/kg/min OR Epinephrine/Norepinephrine < 0.1µg/kg/min OR vasopressin OR phenylephrine:**  YES    NO

**Dopamine >15µg/kg/min OR Epinephrine/Norepinephrine > 0.1µg/kg/min:**       YES    NO

**Neuromuscular blocking agents?**    YES    NO    Unknown

**Other intervention(s) or procedure(s)?**  YES    NO    Unknown    **If YES, Specify:** \_\_\_\_\_

**Current admission to ICU/ITU/IMC/HDU?**  YES    NO    Unknown      (Record the worst value on day of assessment)

**PaO<sub>2</sub> (at time nearest to the FiO<sub>2</sub> recorded at top of page)** [ ][ ][ ][ ] kPa or [ ][ ][ ][ ] mmHg       Not done

**PaO<sub>2</sub> sample type:**    Arterial    Capillary    Unknown

**From same blood gas record as PaO<sub>2</sub>:**
**PCO<sub>2</sub>** \_\_\_\_\_ kPa or \_\_\_\_\_ mmHg    |    **pH** \_\_\_\_\_    |    **HCO<sub>3</sub><sup>-</sup>** \_\_\_\_\_ mEq/L    |    **Base excess** \_\_\_\_\_ mmol/L

**Richmond Agitation-Sedation Scale (RASS)** [ ][ ]    or    **Riker Sedation-Agitation Scale (SAS)** [ ][ ]       Unknown

**Mean Arterial Blood Pressure** [ ][ ][ ][ ] mmHg       Unknown

**Urine flow rate** [ ][ ][ ][ ][ ][ ][ ] mL/24 hours       Check if estimated       Unknown

## MODULE 2: DAILY CASE REPORT FORM

Complete on the day of admission or first COVID-19 investigation, and on the first day of ICU admission (if different from day of admission). In addition, depending on available resources, complete every day for a maximum of 14 days, or for days when biochemical results are available.

**LABORATORY RESULTS (on admission, on any admission to ICU, then daily) – complete every line**
**DATE OF ASSESSMENT (DD/MM/YYYY):** [ \_D\_ ][ \_D\_ ]/[ \_M\_ ][ \_M\_ ]/[ \_2\_ ][ \_0\_ ][ \_Y\_ ][ \_Y\_ ]

Record the worst value between 00:00 to 24:00 on day of assessment (if Not Available write 'N/A'):

**LABORATORY RESULTS** (\*record units if different from those listed)

| Parameter                             | Value* | Not done              | Parameter             | Value* | Not done              |
|---------------------------------------|--------|-----------------------|-----------------------|--------|-----------------------|
| Haemoglobin (g/L)                     |        | <input type="radio"/> | Urea (BUN) (mmol/L)   |        | <input type="radio"/> |
| WBC count (x10 <sup>9</sup> /L)       |        | <input type="radio"/> | Lactate (mmol/L)      |        | <input type="radio"/> |
| Lymphocyte count (10 <sup>9</sup> /L) |        | <input type="radio"/> | Creatinine (µmol/L)   |        | <input type="radio"/> |
| Neutrophil count (10 <sup>9</sup> /L) |        | <input type="radio"/> | Sodium (mmol/L)       |        | <input type="radio"/> |
| Haematocrit (%)                       |        | <input type="radio"/> | Potassium (mmol/L)    |        | <input type="radio"/> |
| Platelets (x10 <sup>9</sup> /L)       |        | <input type="radio"/> | Procalcitonin (ng/mL) |        | <input type="radio"/> |
| APTT (seconds)                        |        | <input type="radio"/> | CRP (mg/L)            |        | <input type="radio"/> |
| APTR                                  |        | <input type="radio"/> | LDH (U/L)             |        | <input type="radio"/> |
| PT (seconds)                          |        | <input type="radio"/> | Creatine kinase (U/L) |        | <input type="radio"/> |
| INR                                   |        | <input type="radio"/> | Troponin I (ng/mL)    |        | <input type="radio"/> |
| ALT/SGPT (U/L)                        |        | <input type="radio"/> | D-dimer (mg/L)        |        | <input type="radio"/> |
| Total bilirubin (µmol/L)              |        | <input type="radio"/> | Ferritin (ng/mL)      |        | <input type="radio"/> |
| AST/SGOT (U/L)                        |        | <input type="radio"/> | IL-6 (pg/mL)          |        | <input type="radio"/> |
| Glucose (mmol/L)                      |        | <input type="radio"/> |                       |        |                       |

### MODULE 3: OUTCOME CASE REPORT FORM

**TREATMENT: At ANY time during hospitalisation, did the patient receive/undergo:**
**Any Oxygen therapy?**  YES  NO  Unknown      **If YES, total duration:** \_\_\_\_\_ days  Unknown

**Maximum O<sub>2</sub> flow volume:**  <2 L/min  2-5 L/min  6-10 L/min  11-15 L/min  >15 L/min

**Non-invasive ventilation? (Any)**  YES  NO  Unknown      **If YES, total duration:** \_\_\_\_\_ days  Unknown

**Invasive ventilation? (Any)**  YES  NO  Unknown      **If YES, total duration:** \_\_\_\_\_ days  Unknown

**Prone Positioning?**  YES  NO  Unknown      **If YES, total duration:** \_\_\_\_\_ days  Unknown

**Inhaled Nitric Oxide?**  YES  NO  Unknown

**Tracheostomy inserted?**  YES  NO  Unknown

**Extracorporeal support (ECMO)?**  YES  NO  Unknown      **If YES, total duration:** \_\_\_\_\_ days  Unknown

**Renal replacement therapy (RRT) or dialysis?**  YES  NO  Unknown

**Inotropes/vasopressors?**  YES  NO  Unknown      **If YES, total duration:** \_\_\_\_\_ days  Unknown

**ICU or High Dependency Unit admission?**  YES  NO  Unknown      **If YES, total duration:** \_\_\_\_\_ days  Unknown

**If YES, date of ICU admission:** [ \_ ] [ \_ ] / [ \_ M ] [ \_ M ] / [ \_ 2 ] [ \_ 0 ] [ \_ Y ] [ \_ Y ]  Unknown

**date of ICU discharge:** [ \_ ] [ \_ ] / [ \_ M ] [ \_ M ] / [ \_ 2 ] [ \_ 0 ] [ \_ Y ] [ \_ Y ]  Unknown

**COMPLICATIONS: At any time during hospitalisation did the patient experience: (Unk = Unknown)**

|                                                                                                                                   |                                                                              |                                         |                                                                              |
|-----------------------------------------------------------------------------------------------------------------------------------|------------------------------------------------------------------------------|-----------------------------------------|------------------------------------------------------------------------------|
| Viral pneumonia/pneumonitis                                                                                                       | <input type="radio"/> YES <input type="radio"/> NO <input type="radio"/> Unk | Stroke / Cerebrovascular accident       | <input type="radio"/> YES <input type="radio"/> NO <input type="radio"/> Unk |
| Bacterial pneumonia                                                                                                               | <input type="radio"/> YES <input type="radio"/> NO <input type="radio"/> Unk | Meningitis / Encephalitis               | <input type="radio"/> YES <input type="radio"/> NO <input type="radio"/> Unk |
| Acute Respiratory Distress Syndrome                                                                                               | <input type="radio"/> YES <input type="radio"/> NO <input type="radio"/> Unk | Bacteremia                              | <input type="radio"/> YES <input type="radio"/> NO <input type="radio"/> Unk |
| If YES, specify: <input type="radio"/> Mild <input type="radio"/> Moderate <input type="radio"/> Severe <input type="radio"/> Unk |                                                                              | Coagulation disorder / DIC              | <input type="radio"/> YES <input type="radio"/> NO <input type="radio"/> Unk |
| Pneumothorax                                                                                                                      | <input type="radio"/> YES <input type="radio"/> NO <input type="radio"/> Unk | Pulmonary embolism                      | <input type="radio"/> YES <input type="radio"/> NO <input type="radio"/> Unk |
| Pleural effusion                                                                                                                  | <input type="radio"/> YES <input type="radio"/> NO <input type="radio"/> Unk | Anemia                                  | <input type="radio"/> YES <input type="radio"/> NO <input type="radio"/> Unk |
| Cryptogenic organizing pneumonia (COP)                                                                                            | <input type="radio"/> YES <input type="radio"/> NO <input type="radio"/> Unk | Rhabdomyolysis / Myositis               | <input type="radio"/> YES <input type="radio"/> NO <input type="radio"/> Unk |
| Bronchiolitis                                                                                                                     | <input type="radio"/> YES <input type="radio"/> NO <input type="radio"/> Unk | Acute renal injury/ Acute renal failure | <input type="radio"/> YES <input type="radio"/> NO <input type="radio"/> Unk |
| Cardiac arrest                                                                                                                    | <input type="radio"/> YES <input type="radio"/> NO <input type="radio"/> Unk | Gastrointestinal haemorrhage            | <input type="radio"/> YES <input type="radio"/> NO <input type="radio"/> Unk |
| Myocardial infarction                                                                                                             | <input type="radio"/> YES <input type="radio"/> NO <input type="radio"/> Unk | Pancreatitis                            | <input type="radio"/> YES <input type="radio"/> NO <input type="radio"/> Unk |
| Cardiac ischaemia                                                                                                                 | <input type="radio"/> YES <input type="radio"/> NO <input type="radio"/> Unk | Liver dysfunction                       | <input type="radio"/> YES <input type="radio"/> NO <input type="radio"/> Unk |
| Cardiac arrhythmia                                                                                                                | <input type="radio"/> YES <input type="radio"/> NO <input type="radio"/> Unk | Hyperglycemia                           | <input type="radio"/> YES <input type="radio"/> NO <input type="radio"/> Unk |
| Myocarditis / Pericarditis                                                                                                        | <input type="radio"/> YES <input type="radio"/> NO <input type="radio"/> Unk | Hypoglycemia                            | <input type="radio"/> YES <input type="radio"/> NO <input type="radio"/> Unk |
| Endocarditis                                                                                                                      | <input type="radio"/> YES <input type="radio"/> NO <input type="radio"/> Unk | Other<br><br>If YES specify:            |                                                                              |
| Cardiomyopathy                                                                                                                    | <input type="radio"/> YES <input type="radio"/> NO <input type="radio"/> Unk |                                         |                                                                              |
| Congestive heart failure                                                                                                          | <input type="radio"/> YES <input type="radio"/> NO <input type="radio"/> Unk |                                         |                                                                              |
| Seizure                                                                                                                           | <input type="radio"/> YES <input type="radio"/> NO <input type="radio"/> Unk |                                         |                                                                              |

**MODULE 3: OUTCOME CASE REPORT FORM**
**DIAGNOSTICS**

**Was patient clinically diagnosed with COVID-19?**  YES  NO  Unknown  
**Was pathogen testing done during this illness episode?**  YES (*complete section*)  NO  Unknown  
**Coronavirus:**  Positive  Negative  Not done **If Positive:**  COVID-2019/ SARS-CoV2  MERS CoV  
 Other CoV: \_\_\_\_\_  Unknown  
**Influenza :**  Positive  Negative  Not done **If Positive:**  A/H3N2  A/H1N1pdm09  A/H7N9  A/H5N1  A-not typed  B  
 Other: \_\_\_\_\_  Unknown  
**RSV:**  Positive  Negative  Not done  
**Adenovirus:**  Positive  Negative  Not done  
**Bacteria:**  Positive  Negative  Not done **If Positive, specify:** \_\_\_\_\_  Unknown  
**Other pathogen/s detected:**  YES  NO  Unknown **If YES, specify all:** \_\_\_\_\_  Unknown  
 \*\*\*\*\*  
**Clinical pneumonia diagnosed?**  YES  NO  Unknown  
**Chest X-Ray performed?**  YES  NO  Unknown **If Yes: Were infiltrates present?**  YES  NO  Unknown  
**CT performed?**  YES  NO  Unknown **If Yes: Were infiltrates present?**  YES  NO  Unknown

| Collection Date<br>(DD/MM/YYYY)         | Biospecimen Type                                                                                                                                                                                                                                                                                                                                                      | Laboratory test Method                                                                                    | Result                                                                                            | Pathogen Tested/Detected |
|-----------------------------------------|-----------------------------------------------------------------------------------------------------------------------------------------------------------------------------------------------------------------------------------------------------------------------------------------------------------------------------------------------------------------------|-----------------------------------------------------------------------------------------------------------|---------------------------------------------------------------------------------------------------|--------------------------|
| _ D _ D / _ M _ M / 20 _ Y _ Y<br>_____ | <input type="radio"/> Nasal/NP swab <input type="radio"/> Throat swab<br><input type="radio"/> Combined nasal/NP+throat swab<br><input type="radio"/> Sputum <input type="radio"/> BAL <input type="radio"/> ETA <input type="radio"/> Urine<br><input type="radio"/> Feces/rectal swab <input type="radio"/> Blood<br><input type="radio"/> Other, Specify: _____    | <input type="radio"/> PCR<br><input type="radio"/> Culture<br><input type="radio"/> Other, Specify: _____ | <input type="radio"/> Positive<br><input type="radio"/> Negative<br><input type="radio"/> Unknown | _____<br>_____           |
| _ D _ D / _ M _ M / 20 _ Y _ Y<br>_____ | <input type="radio"/> Nasal/NP swab <input type="radio"/> Throat swab<br><input type="radio"/> Combined nasal/NP+throat swab<br><input type="radio"/> Sputum <input type="radio"/> BAL <input type="radio"/> ETA <input type="radio"/> Urine<br><input type="radio"/> Feces/rectal swab <input type="radio"/> Blood<br><input type="radio"/> Other, Specify: _____    | <input type="radio"/> PCR<br><input type="radio"/> Culture<br><input type="radio"/> Other, Specify: _____ | <input type="radio"/> Positive<br><input type="radio"/> Negative<br><input type="radio"/> Unknown | _____<br>_____           |
| _ D _ D / _ M _ M / 20 _ Y _ Y<br>_____ | <input type="radio"/> Nasal/NP swab <input type="radio"/> Throat swab<br><input type="radio"/> Combined nasal/NP+throat swab<br><input type="radio"/> Sputum <input type="radio"/> BAL <input type="radio"/> ETA <input type="radio"/> Urine<br><input type="radio"/> Feces/rectal swab <input type="radio"/> Blood<br><input type="radio"/> Other, Specify: _____    | <input type="radio"/> PCR<br><input type="radio"/> Culture<br><input type="radio"/> Other, Specify: _____ | <input type="radio"/> Positive<br><input type="radio"/> Negative<br><input type="radio"/> Unknown | _____<br>_____           |
| _ D _ D / _ M _ M / 20 _ Y _ Y<br>_____ | <input type="radio"/> Nasal/NP swab <input type="radio"/> Throat swab<br><input type="radio"/> Combined nasal/NP+throat swab<br><input type="radio"/> Sputum <input type="radio"/> BAL <input type="radio"/> ETA <input type="radio"/> Urine<br><input type="radio"/> Faeces/rectal swab <input type="radio"/> Blood<br><input type="radio"/> Other, Specify: _____   | <input type="radio"/> PCR<br><input type="radio"/> Culture<br><input type="radio"/> Other, Specify: _____ | <input type="radio"/> Positive<br><input type="radio"/> Negative<br><input type="radio"/> Unknown | _____<br>_____           |
| _ D _ D / _ M _ M / 20 _ Y _ Y<br>_____ | <input type="radio"/> Nasal/NP swab <input type="radio"/> Throat swab<br><input type="radio"/> Combined nasal/NP+throat swab<br><input type="radio"/> Sputum <input type="radio"/> BAL <input type="radio"/> ETA <input type="checkbox"/> Urine<br><input type="radio"/> Feces/rectal swab <input type="radio"/> Blood<br><input type="radio"/> Other, Specify: _____ | <input type="radio"/> PCR<br><input type="radio"/> Culture<br><input type="radio"/> Other, Specify: _____ | <input type="radio"/> Positive<br><input type="radio"/> Negative<br><input type="radio"/> Unknown | _____<br>_____           |

**MODULE 3: OUTCOME CASE REPORT FORM**

| <b>MEDICATION: While hospitalised or at discharge, were any of the following administered?</b> ( <i>Unk=Unknown</i> )                                                                                                                                 |                                                                                           |
|-------------------------------------------------------------------------------------------------------------------------------------------------------------------------------------------------------------------------------------------------------|-------------------------------------------------------------------------------------------|
| Antiviral or COVID-19 targeted agent? <input type="radio"/> YES <input type="radio"/> NO <input type="radio"/> Unknown <b>If YES, specify all agents and duration:</b>                                                                                |                                                                                           |
| <input type="checkbox"/> Ribavirin                  Date commenced [ _ ] [ _ ] [ _ ] / [ _ ] [ _ ] [ _ ] / [ 2 ] [ 0 ] [ _ ] [ _ ]                                                                                                                    | Duration: _____ days <input type="radio"/> Unk                                            |
| <input type="checkbox"/> Lopinavir/Ritonavir    Date commenced [ _ ] [ _ ] [ _ ] / [ _ ] [ _ ] [ _ ] / [ 2 ] [ 0 ] [ _ ] [ _ ]                                                                                                                        | Duration: _____ days <input type="radio"/> Unk                                            |
| <input type="checkbox"/> Remdesivir    Date commenced [ _ ] [ _ ] [ _ ] / [ _ ] [ _ ] [ _ ] / [ 2 ] [ 0 ] [ _ ] [ _ ]                                                                                                                                 | Duration: _____ days <input type="radio"/> Unk                                            |
| <input type="checkbox"/> Interferon alpha    Date commenced [ _ ] [ _ ] [ _ ] / [ _ ] [ _ ] [ _ ] / [ 2 ] [ 0 ] [ _ ] [ _ ]                                                                                                                           | Duration: _____ days <input type="radio"/> Unk                                            |
| <input type="checkbox"/> Interferon beta    Date commenced [ _ ] [ _ ] [ _ ] / [ _ ] [ _ ] [ _ ] / [ 2 ] [ 0 ] [ _ ] [ _ ]                                                                                                                            | Duration: _____ days <input type="radio"/> Unk                                            |
| <input type="checkbox"/> Chloroquine/hydroxychloroquine    Date commenced [ _ ] [ _ ] [ _ ] / [ _ ] [ _ ] [ _ ] / [ 2 ] [ 0 ] [ _ ] [ _ ]                                                                                                             | Duration: _____ days <input type="radio"/> Unk                                            |
| <input type="checkbox"/> Other _____    Date commenced [ _ ] [ _ ] [ _ ] / [ _ ] [ _ ] [ _ ] / [ 2 ] [ 0 ] [ _ ] [ _ ]                                                                                                                                | Duration: _____ days <input type="radio"/> Unk                                            |
| *****                                                                                                                                                                                                                                                 |                                                                                           |
| Antibiotic? <input type="radio"/> YES <input type="radio"/> NO <input type="radio"/> Unk <b>If yes, specify all:</b>                                                                                                                                  |                                                                                           |
| Agent: _____    Date commenced [ _ ] [ _ ] [ _ ] / [ _ ] [ _ ] [ _ ] / [ 2 ] [ 0 ] [ _ ] [ _ ]                                                                                                                                                        | Duration: _____ days <input type="radio"/> Unk                                            |
| Agent: _____    Date commenced [ _ ] [ _ ] [ _ ] / [ _ ] [ _ ] [ _ ] / [ 2 ] [ 0 ] [ _ ] [ _ ]                                                                                                                                                        | Duration: _____ days <input type="radio"/> Unk                                            |
| Agent: _____    Date commenced [ _ ] [ _ ] [ _ ] / [ _ ] [ _ ] [ _ ] / [ 2 ] [ 0 ] [ _ ] [ _ ]                                                                                                                                                        | Duration: _____ days <input type="radio"/> Unk                                            |
| *****                                                                                                                                                                                                                                                 |                                                                                           |
| Corticosteroid? <input type="radio"/> YES <input type="radio"/> NO <input type="radio"/> Unk <b>If YES, Route:</b> <input type="checkbox"/> Oral <input type="checkbox"/> Intravenous (IV) <input type="checkbox"/> Inhaled <input type="radio"/> Unk |                                                                                           |
| <b>If YES Oral or IV, please provide agent: _____ and max. daily dose &amp; unit: _____</b>                                                                                                                                                           |                                                                                           |
| Date commenced [ _ ] [ _ ] [ _ ] / [ _ ] [ _ ] [ _ ] / [ 2 ] [ 0 ] [ _ ] [ _ ]                                                                                                                                                                        | <input type="radio"/> Unk                  Duration: _____ days <input type="radio"/> Unk |
| *****                                                                                                                                                                                                                                                 |                                                                                           |
| Heparin? <input type="radio"/> YES <input type="radio"/> NO <input type="radio"/> Unk <b>If YES, Route:</b> <input type="checkbox"/> Subcutaneous <input type="checkbox"/> Intravenous (IV) <input type="radio"/> Unk                                 |                                                                                           |
| <b>If YES:</b> <input type="checkbox"/> Unfractionated <input type="checkbox"/> Low molecular weight <input type="checkbox"/> Fondaparinux <input type="radio"/> Unk                                                                                  | <b>Maximum daily dose &amp; unit: _____</b>                                               |
| Date commenced [ _ ] [ _ ] [ _ ] / [ _ ] [ _ ] [ _ ] / [ 2 ] [ 0 ] [ _ ] [ _ ]                                                                                                                                                                        | <input type="radio"/> Unk                  Duration: _____ days <input type="radio"/> Unk |
| *****                                                                                                                                                                                                                                                 |                                                                                           |
| Antifungal agent? <input type="radio"/> YES <input type="radio"/> NO <input type="radio"/> Unk                                                                                                                                                        |                                                                                           |
| *****                                                                                                                                                                                                                                                 |                                                                                           |
| Other treatments administered for COVID-19 including experimental or compassionate use? <input type="radio"/> YES <input type="radio"/> NO <input type="radio"/> Unk                                                                                  |                                                                                           |
| <b>If yes, specify agent, maximum daily does and duration:</b>                                                                                                                                                                                        |                                                                                           |
| Agent: _____    Maximum daily dose & unit: _____                                                                                                                                                                                                      | <input type="radio"/> Unk                                                                 |
| Date of commencement [ _ ] [ _ ] [ _ ] / [ _ ] [ _ ] [ _ ] / [ 2 ] [ 0 ] [ _ ] [ _ ]                                                                                                                                                                  | <input type="radio"/> Unk                  Duration: _____ days <input type="radio"/> Unk |
| Agent: _____    Maximum daily dose & unit: _____                                                                                                                                                                                                      | <input type="radio"/> Unk                                                                 |
| Date of commencement [ _ ] [ _ ] [ _ ] / [ _ ] [ _ ] [ _ ] / [ 2 ] [ 0 ] [ _ ] [ _ ]                                                                                                                                                                  | <input type="radio"/> Unk                  Duration: _____ days <input type="radio"/> Unk |

| OUTCOME                                                                                                                                                                                                                                         |
|-------------------------------------------------------------------------------------------------------------------------------------------------------------------------------------------------------------------------------------------------|
| <b>Outcome:</b> <input type="radio"/> Discharged alive <input type="radio"/> Hospitalised <input type="radio"/> Transfer to other facility <input type="radio"/> Death <input type="radio"/> Palliative discharge <input type="radio"/> Unknown |
| <b>Outcome date:</b> [ _ ] [ _ ] [ _ ] / [ _ ] [ _ ] [ _ ] / [ 2 ] [ 0 ] [ _ ] [ _ ] <input type="radio"/> Unknown                                                                                                                              |
| <b>If Discharged alive:</b>                                                                                                                                                                                                                     |
| Ability to self-care at discharge versus before illness: <input type="radio"/> Same as before illness <input type="radio"/> Worse <input type="radio"/> Better <input type="radio"/> Unknown                                                    |
| Post-discharge treatment: Oxygen therapy? <input type="radio"/> YES <input type="radio"/> NO <input type="radio"/> Unknown                                                                                                                      |

**Document S4.** Additional case report form regarding mechanical ventilation and ExtraCorporeal Membrane Oxygenation

## Appendix B: Data Collection Form ECMOCARD

### CORE CASE RECORD FORM (EOT ICU Admis)

#### 1. UPON ICU ADMISSION – Please complete the below data as of the date and time of the patient's admission to the ICU

Is this patient's data collected using Full or Basic daily data forms?

- Full (forms completed every day of stay)
- Basic (reduced frequency of daily data collection)

DATE OF ICU ADMISSION: \_\_\_\_ / \_\_\_\_ / \_\_\_\_

1.1 HEIGHT (cm): \_\_\_\_\_

*If this data has already been entered into the 'Signs and Symptoms' section of the ISARIC CRF, please DO NOT re-enter the data here. Leave this '1.1 Height' box blank.*

1.2 BODY WEIGHT (Kg): \_\_\_\_\_

*If this data has already been entered into the 'Signs and Symptoms' section of the ISARIC CRF, please DO NOT re-enter the data here. Leave this '1.2 Body Weight' box blank.*

1.3 Arterial Hypertension

- Yes
- No

*If this data has already been entered into the 'Co-Morbidities & Risk Factors' section of the ISARIC CRF, please DO NOT re-enter the data here. Leave this '1.3 Hypertension' box blank.*

1.3a Chronic anti-hypertensive therapy?

- Yes
- No

1.3b Chronic anti-hypertensive therapy (if 'Yes' to 1.3. Please select up to three)

- Diuretics
- Calcium channel blockers
- ACE inhibitors

*If this data has already been entered in the 'Pre-Admission Medication' section of the ISARIC CRF, please DO NOT re-enter the data here. Leave this 'ACE inhibitors' box blank.*

- Angiotensin II receptor antagonists

*If this data has already been entered in the 'Pre-Admission Medication' section of the ISARIC CRF, please DO NOT re-enter the data here. Leave this 'Angiotensin II receptor antagonists' box blank.*

- Renin inhibitors
- Beta blockers
- Alpha blockers
- Vasodilators
- Aldosterone receptor antagonist
- Alpha-2 adrenergic receptor agonists
- Not applicable

#### 1.4 PRE HOSPITAL ADMISSION CREATININE AVAILABLE?

- Yes
- No

1.4a PRE-HOSPITAL ADMISSION CREATININE: \_\_\_\_\_

#### 1.4a Creatinine units

- mg/dL
- umol/L

#### 1.5 GASTROINTESTINAL AND PANCREATIC COMORBIDITIES

- Yes
- No

#### 1.6 HEPATIC AND BILIARY COMORBIDITIES

- Yes
- No

#### 1.7 HAEMATOLOGIC AND SPLEEN COMORBIDITIES

- Yes
- No

#### 1.8 IMMUNOLOGICAL AND TRANSPLANT COMORBIDITIES

- Yes
- No



**1.9 ENDOCRINOLOGICAL COMORBIDITIES**

- Yes
- No

**1.10 GENITO-URINARY COMORBIDITIES**

- Yes
- No

**1.11 CHRONIC ALCOHOL ABUSE**

- Yes
- No

**1.12 INTRAVENOUS DRUGS ABUSE**

- Yes
- No

**1.13 IMMUNO-COMPETENT**

- Yes
- No

**1.14 APACHE II SCORE:** \_\_\_\_\_ (ONLY NUMBERS FROM 0 to 71)

APACHE II score can be calculated at the following link <https://www.mdcalc.com/apache-ii-score>

- Not available

**1.15 SOFA SCORE:** \_\_\_\_\_ (ONLY NUMBERS FROM 0 to 24)

SOFA score can be calculated at the following link <https://www.mdcalc.com/sequential-organ-failure-assessment-sofa-score>

- Not available

**BLOOD GAS ANALYSIS (Qs 1.16 – 1.21) – Please document the values associated with the ‘worst’ blood gas analysis in the 6 hours prior to ICU admission. ‘Worst’ blood gas is defined as the blood gas with the lowest PaO<sub>2</sub>/FiO<sub>2</sub> ratio.**

**1.16 ARTERIAL pH IN THE 6h BEFORE ICU ADMISSION:** \_\_\_\_\_ (ONLY NUMBERS FROM 6.500 TO 7.600)

Please document the values associated with the 'worst' blood gas analysis in the 6 hours prior to ICU admission. 'Worst' is defined as the blood gas with the lowest PaO<sub>2</sub>/FiO<sub>2</sub> ratio.

Not available

**1.17 ARTERIAL PARTIAL PRESSURE OF OXYGEN IN THE 6h BEFORE ICU ADMISSION:** \_\_\_\_\_

(ONLY NUMBERS FROM 10-500)

Units: mmHg kPa

Please document the values associated with the 'worst' blood gas analysis in the 6 hours prior to ICU admission. 'Worst' is defined as the blood gas with the lowest PaO<sub>2</sub>/FiO<sub>2</sub> ratio.

Not available

**1.18 ARTERIAL PARTIAL PRESSURE OF CARBON DIOXIDE IN THE 6h BEFORE ICU ADMISSION:** \_\_\_\_\_

(ONLY NUMBERS FROM 10 TO 100)

Units: mmHg kPa

Please document the values associated with the 'worst' blood gas analysis in the 6 hours prior to ICU admission. 'Worst' is defined as the blood gas with the lowest PaO<sub>2</sub>/FiO<sub>2</sub> ratio.

Not available

**1.19 ARTERIAL BICARBONATE (HCO<sub>3</sub><sup>-</sup>) IN THE 6h BEFORE ICU ADMISSION:** \_\_\_\_\_

Units: mEq/L mmol/L

Please document the values associated with the 'worst' blood gas analysis in the 6 hours prior to ICU admission. 'Worst' is defined as the blood gas with the lowest PaO<sub>2</sub>/FiO<sub>2</sub> ratio.

Not available

**1.20 ARTERIAL BASE EXCESS IN THE 6h BEFORE ICU ADMISSION:** \_\_\_\_\_ mmol/L

(ONLY NUMBERS FROM -50 - +50)

Please document the values associated with the 'worst' blood gas analysis in the 6 hours prior to ICU admission. 'Worst' is defined as the blood gas with the lowest PaO<sub>2</sub>/FiO<sub>2</sub> ratio.

Not available

**1.21 LACTATE IN THE 6h BEFORE ICU ADMISSION:** \_\_\_\_\_ mmol/L

Please document the values associated with the 'worst' blood gas analysis in the 6 hours prior to ICU admission. 'Worst' is defined as the blood gas with the lowest PaO<sub>2</sub>/FiO<sub>2</sub> ratio.

Not available

**1.22 Troponin in the last 12 hours: (tick 2 at most)**

- Troponin T: \_\_\_\_\_ (ng/mL or ng/L) ONLY NUMBERS FROM 0 TO 150
- Troponin I: \_\_\_\_\_ (ng/mL or ng/L) ONLY NUMBERS FROM 0 TO 150
- High sensitivity troponin T: \_\_\_\_\_ (ng/mL or ng/L) ONLY NUMBERS FROM 0 TO 150
- High sensitivity troponin I: \_\_\_\_\_ (ng/mL or ng/L) ONLY NUMBERS FROM 0 TO 150
- Not available

**1.23 Cardiac BNP in the last 12 hours:** \_\_\_\_\_ (picograms/mL) ONLY NUMBERS BETWEEN 0-30000

**1.24 Upon ICU admission, did the patient present with cutaneous manifestations?**

- Yes
- No
- Not available

**If yes to 1.24a, type of cutaneous manifestations (please select up to three (3) options)**

- Bullae
- Macules
- Nodules
- Papules
- Plaques
- Purpura
- Pustules
- Rash
- Scale
- Urticaria
- Vesicles
- Other: \_\_\_\_\_

**If yes to 1.24b, specify the involved regions (please select up to three (3) options):**

- Face
- Trunk
- Upper limbs
- Hands
- Lower limbs
- Feet

## CORE CASE RECORD FORM (EOT Mech Vent)

**2. UPON COMMENCEMENT OF MECHANICAL VENTILATION - 'Mechanical ventilation' includes invasive mechanical ventilation via an endotracheal tube or tracheostomy only.**

**Importantly, this module will be active only when you click 'YES' in the field '1.17 Invasive ventilation' of the ISARIC form.**

**2.1 DATE OF START OF MECHANICAL VENTILATION:** \_\_\_\_ / \_\_\_\_ / \_\_\_\_ (DD/MM/YY)

### 2.2 SITE OF INTUBATION

- Outside hospital
- Intensive Care Unit
- Emergency Department
- Hospital Ward
- Different hospital, then patient was transferred
- Other

### 2.3 TYPE OF INTUBATION

- Elective
- Emergent

### 2.4 CARDIAC ARREST

- Yes
- No

### 2.5 VENTILATORY SUPPORT BEFORE INTUBATION

- High-Flow Oxygen Ventilation
- Mask non-invasive ventilation
- Full Face-mask non-invasive ventilation
- Helmet non-invasive ventilation
- Simple face mask oxygen therapy
- Venturi mask oxygen therapy
- Non re-breather face mask oxygen therapy
- Nasal prongs oxygen therapy
- Other
- Not available

**BLOOD GAS ANALYSIS (Qs 2.6 – 2.11) – Please document the values associated with the 'worst' blood gas analysis in the 6 hours prior to commencement of mechanical ventilation. 'Worst' blood gas is defined as the blood gas with the lowest PaO<sub>2</sub>/FiO<sub>2</sub> ratio.**

**2.6 ARTERIAL pH IN THE 6 HOURS BEFORE START OF MV:** \_\_\_\_\_ (ONLY NUMBERS FROM 6.500 TO 7.600)

*Please document the values associated with the 'worst' blood gas analysis in the 6 hours prior to commencement of mechanical ventilation. 'Worst' is defined as the blood gas with the lowest PaO<sub>2</sub>/FiO<sub>2</sub> ratio.*

Not available

**2.7 ARTERIAL PARTIAL PRESSURE OF OXYGEN (mmHg) IN THE 6 HOURS BEFORE START OF MV:** \_\_\_\_\_ (ONLY NUMBERS FROM 20 TO 500)

Units: mmHg kPa

*Please document the values associated with the 'worst' blood gas analysis in the 6 hours prior to commencement of mechanical ventilation. 'Worst' is defined as the blood gas with the lowest PaO<sub>2</sub>/FiO<sub>2</sub> ratio.*

Not available

**2.8 ARTERIAL PARTIAL PRESSURE OF CARBON DIOXIDE IN THE 6 HOURS BEFORE START OF MV:** \_\_\_\_\_ (ONLY NUMBERS FROM 10 TO 100)

Units: mmHg kPa

*Please document the values associated with the 'worst' blood gas analysis in the 6 hours prior to commencement of mechanical ventilation. 'Worst' is defined as the blood gas with the lowest PaO<sub>2</sub>/FiO<sub>2</sub> ratio.*

Not available

**2.9 ARTERIAL HCO<sub>3</sub><sup>-</sup> IN THE 6 HOURS BEFORE START OF MV:** \_\_\_\_\_ (ONLY NUMBERS FROM 1 TO 50)

Units mEq/L mmol/L

*Please document the values associated with the 'worst' blood gas analysis in the 6 hours prior to commencement of mechanical ventilation. 'Worst' is defined as the blood gas with the lowest PaO<sub>2</sub>/FiO<sub>2</sub> ratio.*

Not available

**2.10 ARTERIAL Base excess IN THE 6 HOURS BEFORE START OF MV** \_\_\_\_\_ mmol/L (ONLY NUMBERS FROM -50 TO +50)

*Please document the values associated with the 'worst' blood gas analysis in the 6 hours prior to commencement of mechanical ventilation. 'Worst' is defined as the blood gas with the lowest PaO<sub>2</sub>/FiO<sub>2</sub> ratio.*

Not available

**2.11 Lactate IN THE 6 HOURS BEFORE START OF MV** \_\_\_\_\_ mmol/L

*Please document the values associated with the 'worst' blood gas analysis in the 6 hours prior to commencement of mechanical ventilation. 'Worst' is defined as the blood gas with the lowest PaO<sub>2</sub>/FiO<sub>2</sub> ratio.*

Not available

## 2.12 USE OF CONTINUOUS RENAL REPLACEMENT THERAPY BEFORE START OF MV

- Yes
- No

## 2.13 USE OF VASOACTIVE DRUGS BEFORE START OF MV

- Yes
- No

## 2.14 USE OF CARDIAC ASSIST DEVICES BEFORE START OF MV

- Yes
- No

## 2.15 ANTIBIOTICS BEFORE START OF MV

- |                                                       |                                                 |                                                |
|-------------------------------------------------------|-------------------------------------------------|------------------------------------------------|
| <input type="checkbox"/> Amikacin                     | <input type="checkbox"/> Ceftazidime            | <input type="checkbox"/> Gatifloxacin          |
| <input type="checkbox"/> Amoxicillin                  | <input type="checkbox"/> Ceftazidime/Avibactam  | <input type="checkbox"/> Gemifloxacin          |
| <input type="checkbox"/> Amoxicillin + Clavulanate    | <input type="checkbox"/> Ceftibuten             | <input type="checkbox"/> Gentamicin            |
| <input type="checkbox"/> Ampicillin                   | <input type="checkbox"/> Ceftizoxime            | <input type="checkbox"/> Grepafloxacin         |
| <input type="checkbox"/> Ampicillin + Sulbactam       | <input type="checkbox"/> Ceftobiprole           | <input type="checkbox"/> Imipenem/Cilastatin   |
| <input type="checkbox"/> Atovaquone                   | <input type="checkbox"/> Ceftolozane/Tazobactam | <input type="checkbox"/> Imiquimod             |
| <input type="checkbox"/> Azithromycin                 | <input type="checkbox"/> Ceftriaxone            | <input type="checkbox"/> Kanamycin             |
| <input type="checkbox"/> Aztreonam                    | <input type="checkbox"/> Cefuroxime             | <input type="checkbox"/> Levofloxacin          |
| <input type="checkbox"/> Bacampicillin                | <input type="checkbox"/> Cephalexin             | <input type="checkbox"/> Lincomycin            |
| <input type="checkbox"/> Bacitracin                   | <input type="checkbox"/> Cephalothin            | <input type="checkbox"/> Linezolid             |
| <input type="checkbox"/> Capreomycin                  | <input type="checkbox"/> Cephapirin             | <input type="checkbox"/> Lomefloxacin          |
| <input type="checkbox"/> Carbenicillin indanyl sodium | <input type="checkbox"/> Cephradine             | <input type="checkbox"/> Loracarbef            |
| <input type="checkbox"/> Cefaclor                     | <input type="checkbox"/> Chloramphenicol        | <input type="checkbox"/> Mafenide              |
| <input type="checkbox"/> Cefadroxil                   | <input type="checkbox"/> Cinoxacin              | <input type="checkbox"/> Meropenem             |
| <input type="checkbox"/> Cefamandole                  | <input type="checkbox"/> Ciprofloxacin          | <input type="checkbox"/> Methenamine hippurate |
| <input type="checkbox"/> Cefazolin                    | <input type="checkbox"/> Clarithromycin         | <input type="checkbox"/> Methicillin           |
| <input type="checkbox"/> Cefdinir                     | <input type="checkbox"/> Clindamycin            | <input type="checkbox"/> Metronidazole         |
| <input type="checkbox"/> Cefditoren                   | <input type="checkbox"/> Cloxacillin            | <input type="checkbox"/> Mezlocillin           |
| <input type="checkbox"/> Cefepime                     | <input type="checkbox"/> Colistimethate         | <input type="checkbox"/> Minocycline           |
| <input type="checkbox"/> Cefixime                     | <input type="checkbox"/> Cycloserine            | <input type="checkbox"/> Moxifloxacin          |
| <input type="checkbox"/> Cefmetazole                  | <input type="checkbox"/> Daptomycin             | <input type="checkbox"/> Mupirocin             |
| <input type="checkbox"/> Cefonicid                    | <input type="checkbox"/> Demeclocycline         | <input type="checkbox"/> Nafcillin             |
| <input type="checkbox"/> Cefoperazone                 | <input type="checkbox"/> Dicloxacillin          | <input type="checkbox"/> Nalidixic Acid        |
| <input type="checkbox"/> Cefotaxime                   | <input type="checkbox"/> Dirithromycin          | <input type="checkbox"/> Neomycin              |
| <input type="checkbox"/> Cefotetan                    | <input type="checkbox"/> Doripenem              | <input type="checkbox"/> Netilmicin            |
| <input type="checkbox"/> Cefoxitin                    | <input type="checkbox"/> Doxycycline            | <input type="checkbox"/> Nitrofurantoin        |
| <input type="checkbox"/> Cefpodoxime Proxetil         | <input type="checkbox"/> Enoxacin               | <input type="checkbox"/> Nitrofurazone         |
| <input type="checkbox"/> Cefprozil                    | <input type="checkbox"/> Ertapenem              | <input type="checkbox"/> Norfloxacin           |
| <input type="checkbox"/> Ceftaroline                  | <input type="checkbox"/> Erythromycin           | <input type="checkbox"/> Novobiocin            |
|                                                       | <input type="checkbox"/> Fosfomycin             | <input type="checkbox"/> Ofloxacin             |

- Oxacillin
- Oxytetracycline
- Penicillin
- Piperacillin
- Piperacillin + Tazobactam
- Podofilox
- Polymyxin B
- Quinupristin +  
Dalfopristin
- Retapamulin
- Rifapentine
- Rifaximin
- Saturated Solution of  
Potassium Iodide (SSKI)
- Sparfloxacin
- Spectinomycin
- Streptomycin
- Sulfadiazine
- Sulfamethoxazole
- Sulfoxazole
- Sulphur, precipitated in  
petrolatum
- TCA (trichloroacetic acid),  
BCA (bichloroacetic acid).
- Teicoplanin
- Telavancin
- Telithromycin
- Terbinafine
- Tetracycline
- Ticarcillin
- Ticarcillin + Clavulanic  
Acid
- Tigecycline
- Tobramycin
- Trimethoprim
- Trimethoprim +  
Sulfamethoxazole
- Trovafloxacin
- Vancomycin

## CORE CASE RECORD FORM (EOT Start ECMO)

### 3. UPON COMMENCEMENT OF ECMO.

**Importantly, this module will be active only when you click 'YES' in the field '1.18 ECLS' of the ISARIC form.**

3.1 DATE OF START OF ECMO: \_\_\_/\_\_\_/\_\_\_ (DD/MM/YY)

3.2 Is this patient enrolled in the EXCEL study? (Australian sites only)

- Yes  
 No

3.3 If Yes, what is the patient's EXCEL study number \_\_\_\_\_

3.4 Is this patient enrolled in the ELSO Registry?

- Yes  
 No

3.5 If yes, what is the patient's ELSO Registry number: \_\_\_\_\_

3.6 LOCATION OF ECMO CANNULATION:

- Same Hospital  
 Other Hospital, then patient was retrieved and transferred

3.7 Type and Manufacturer of centrifugal blood pump driven circuit: \_\_\_\_\_ (TEXT)

3.8 Type and Manufacturer of low-resistance oxygenator: \_\_\_\_\_ (TEXT)

3.9 TYPE OF ECMO:

- Venous-venous  
 Venous-arterial

3.10 DRAINAGE CANNULA INSERTION SITE:

- Left femoral vein  
 Left internal jugular vein  
 Right femoral vein  
 Right internal jugular vein

3.10a DRAINAGE CANNULA SIZE recorded

- Yes  
 No

3.10b DRAINAGE CANNULA SIZE

\_\_\_\_\_ Fr (ONLY NUMBERS, BETWEEN 5 and 30)



**3.11 RETURN CANNULA INSERTION SITE:**

- Left femoral vein
- Left internal jugular vein
- Right femoral vein
- Right internal jugular vein
- Left femoral artery
- Right femoral artery

**3.11a RETURN CANNULA SIZE recorded**

- Yes
- No

**3.11b RETURN CANNULA SIZE**

\_\_\_\_\_ Fr (ONLY NUMBERS, BETWEEN 5 and 30)

**3.12 CARDIAC ARREST BEFORE START OF ECMO**

- Yes
- No

**3.13 USE OF PRONE POSITION BEFORE START OF ECMO:**

- Yes
- No

**3.14 USE OF NEUROMUSCULAR BLOCKADE BEFORE START OF ECMO:**

- Yes
- No

**3.15 USE OF RECRUITMENT MANOEUVRES BEFORE START OF ECMO:**

- Yes
- No

**3.16 USE OF INHALED NITRIC OXIDE BEFORE START OF ECMO:**

- Yes
- No

**3.17 USE OF BICARBONATE BEFORE START OF ECMO**

- Yes
- No

**3.18 VENTILATORY MODE BEFORE START OF ECMO:**

- Synchronized Intermittent Mandatory Ventilation – Volume-Controlled (SIMV-V)
- Synchronized Intermittent Mandatory Ventilation – Pressure-Controlled (SIMV-P)
- Volume Controlled Ventilation

- Pressure Controlled Ventilation
- Pressure Regulated Volume Control (PRVC)
- Airway Pressure Release Ventilation (APRV)
- Pressure Support Ventilation (PSV)
- Volume Support Ventilation (VSV)
- High Frequency Oscillatory (HFO)
- Bilevel Positive Airway Pressure (BiPAP)
- Continuous Positive Airway Pressure (CPAP)
- Proportional Assist Ventilation (PAV)
- Neurally Adjusted Ventilatory Assist (NAVA)
- Other: \_\_\_\_\_ (TEXT)

**MECHANICAL VENTILATION & BLOOD GAS ANALYSIS (Qs 3.19 - 3.30) – Please document the ‘worst’ value in the 6 hours before the commencement of ECMO. ‘Worst’ means the values associated with the arterial blood gas with the lowest PaO<sub>2</sub>/FiO<sub>2</sub> ratio. Please report ventilatory settings associated with the worst arterial blood gas.**

**3.19 INSPIRATORY FRACTION OF OXYGEN IN THE 6 HOURS BEFORE START OF ECMO:** \_\_\_\_\_ (ONLY NUMBERS, BETWEEN 21 and 100)

*Please document the values associated with the ‘worst’ blood gas analysis in the 6 hours prior to commencement of ECMO. ‘Worst’ is defined as the blood gas with the lowest PaO<sub>2</sub>/FiO<sub>2</sub> ratio.*

Not available

**3.20 RESPIRATORY RATE IN THE 6 HOURS BEFORE START OF ECMO (breaths/min):** \_\_\_\_\_ (ONLY NUMBERS, BETWEEN 2 and 60)

*Please document the values associated with the ‘worst’ blood gas analysis in the 6 hours prior to commencement of ECMO. ‘Worst’ is defined as the blood gas with the lowest PaO<sub>2</sub>/FiO<sub>2</sub> ratio.*

Not available

**3.21 TIDAL VOLUME (ml/Kg of Ideal Body Weight):** \_\_\_\_\_ (ONLY NUMBERS, BETWEEN 1 and 14)

*Please document the values associated with the ‘worst’ blood gas analysis in the 6 hours prior to commencement of ECMO. ‘Worst’ is defined as the blood gas with the lowest PaO<sub>2</sub>/FiO<sub>2</sub> ratio.*

*Ideal Body Weight formula:*

*Male patients:  $50 + (0.91 \times [\text{height in cm} - 152.4])$*

*Female patients:  $45.5 + (0.91 \times \{\text{height in cm} - 152.4\})$*

Not available

**3.22 POSITIVE END EXPIRATORY PRESSURE IN THE 6 HOURS BEFORE START OF ECMO (cmH<sub>2</sub>O):** \_\_\_\_\_ (ONLY NUMBERS, BETWEEN 0 and 25)

Please document the values associated with the 'worst' blood gas analysis in the 6 hours prior to commencement of ECMO. 'Worst' is defined as the blood gas with the lowest PaO<sub>2</sub>/FiO<sub>2</sub> ratio.

Not available

**3.23 PEAK AIRWAY PRESSURE IN THE 6 HOURS BEFORE START OF ECMO (cmH<sub>2</sub>O):** \_\_\_\_\_ (ONLY NUMBERS, BETWEEN 0 and 85)

Please document the values associated with the 'worst' blood gas analysis in the 6 hours prior to commencement of ECMO. 'Worst' is defined as the blood gas with the lowest PaO<sub>2</sub>/FiO<sub>2</sub> ratio.

Not available

**3.24 AIRWAY PLATEAU PRESSURE IN THE 6 HOURS BEFORE START OF ECMO (cmH<sub>2</sub>O):** \_\_\_\_\_ (ONLY NUMBERS, BETWEEN 0 and 50)

Please document the values associated with the 'worst' blood gas analysis in the 6 hours prior to commencement of ECMO. 'Worst' is defined as the blood gas with the lowest PaO<sub>2</sub>/FiO<sub>2</sub> ratio.

Not available

**3.25 ARTERIAL pH IN THE 6 HOURS BEFORE START OF ECMO:** \_\_\_\_\_ (ONLY NUMBERS FROM 6.500 TO 7.600)

Please document the values associated with the 'worst' blood gas analysis in the 6 hours prior to commencement of ECMO. 'Worst' is defined as the blood gas with the lowest PaO<sub>2</sub>/FiO<sub>2</sub> ratio.

Not available

**3.26 ARTERIAL PARTIAL PRESSURE OF OXYGEN IN THE 6 HOURS BEFORE START OF ECMO:** \_\_\_\_\_ (ONLY NUMBERS FROM 20 TO 500)

Please document the values associated with the 'worst' blood gas analysis in the 6 hours prior to commencement of ECMO. 'Worst' is defined as the blood gas with the lowest PaO<sub>2</sub>/FiO<sub>2</sub> ratio.

Units:  mmHg  kPa

Not available

**3.27 ARTERIAL PARTIAL PRESSURE OF CARBON DIOXIDE IN THE 6 HOURS BEFORE START OF ECMO:** \_\_\_\_\_ (ONLY NUMBERS FROM 10 TO 150)

Please document the values associated with the 'worst' blood gas analysis in the 6 hours prior to commencement of ECMO. 'Worst' is defined as the blood gas with the lowest PaO<sub>2</sub>/FiO<sub>2</sub> ratio.

Units:  mmHg  kPa

Not available

**3.28 ARTERIAL HCO<sub>3</sub><sup>-</sup> IN THE 6 HOURS BEFORE START OF ECMO:** \_\_\_\_\_ (ONLY NUMBERS FROM 1 TO 50)

*Please document the values associated with the 'worst' blood gas analysis in the 6 hours prior to commencement of ECMO. 'Worst' is defined as the blood gas with the lowest PaO<sub>2</sub>/FiO<sub>2</sub> ratio.*

Units:  mEq/L  mmol/L

Not available

**3.29 ARTERIAL Base excess IN THE 6 HOURS BEFORE START OF ECMO:** \_\_\_\_\_ mmol/L (ONLY NUMBERS FROM -50 TO +50)

*Please document the values associated with the 'worst' blood gas analysis in the 6 hours prior to commencement of ECMO. 'Worst' is defined as the blood gas with the lowest PaO<sub>2</sub>/FiO<sub>2</sub> ratio.*

Not available

**3.30 Lactate IN THE 6 HOURS BEFORE START OF ECMO:** \_\_\_\_\_ mmol/L

*Please document the values associated with the 'worst' blood gas analysis in the 6 hours prior to commencement of ECMO. 'Worst' is defined as the blood gas with the lowest PaO<sub>2</sub>/FiO<sub>2</sub> ratio.*

Not available

**3.31 USE OF CONTINUOUS RENAL REPLACEMENT THERAPY BEFORE START OF ECMO:**

- Yes  
 No

**3.32 USE OF VASOACTIVE DRUGS BEFORE START OF ECMO:**

- Yes  
 No

**3.33 USE OF CARDIAC ASSIST DEVICE BEFORE START OF ECMO:**

- Yes  
 No

**3.34 USE OF ANTIBIOTICS BEFORE START OF ECMO:**

- Yes  
 No

**3.35 ANTIBIOTICS BEFORE START OF ECMO:**

- |                                      |                                                    |                                                 |
|--------------------------------------|----------------------------------------------------|-------------------------------------------------|
| <input type="checkbox"/> Amikacin    | <input type="checkbox"/> Amoxicillin + Clavulanate | <input type="checkbox"/> Ampicillin + Sulbactam |
| <input type="checkbox"/> Amoxicillin | <input type="checkbox"/> Ampicillin                | <input type="checkbox"/> Atovaquone             |

- |                                                       |                                                |                                                                                 |
|-------------------------------------------------------|------------------------------------------------|---------------------------------------------------------------------------------|
| <input type="checkbox"/> Azithromycin                 | <input type="checkbox"/> Cloxacillin           | <input type="checkbox"/> Ofloxacin                                              |
| <input type="checkbox"/> Aztreonam                    | <input type="checkbox"/> Colistimethate        | <input type="checkbox"/> Oxacillin                                              |
| <input type="checkbox"/> Bacampicillin                | <input type="checkbox"/> Cycloserine           | <input type="checkbox"/> Oxytetracycline                                        |
| <input type="checkbox"/> Bacitracin                   | <input type="checkbox"/> Daptomycin            | <input type="checkbox"/> Penicillin                                             |
| <input type="checkbox"/> Capreomycin                  | <input type="checkbox"/> Demeclocycline        | <input type="checkbox"/> Piperacillin                                           |
| <input type="checkbox"/> Carbenicillin indanyl sodium | <input type="checkbox"/> Dicloxacillin         | <input type="checkbox"/> Piperacillin + Tazobactam                              |
| <input type="checkbox"/> Cefaclor                     | <input type="checkbox"/> Dirithromycin         | <input type="checkbox"/> Podofilox                                              |
| <input type="checkbox"/> Cefadroxil                   | <input type="checkbox"/> Doripenem             | <input type="checkbox"/> Polymyxin B                                            |
| <input type="checkbox"/> Cefamandole                  | <input type="checkbox"/> Doxycycline           | <input type="checkbox"/> Quinupristin + Dalfopristin                            |
| <input type="checkbox"/> Cefazolin                    | <input type="checkbox"/> Enoxacin              | <input type="checkbox"/> Retapamulin                                            |
| <input type="checkbox"/> Cefdinir                     | <input type="checkbox"/> Ertapenem             | <input type="checkbox"/> Rifapentine                                            |
| <input type="checkbox"/> Cefditoren                   | <input type="checkbox"/> Erythromycin          | <input type="checkbox"/> Rifaximin                                              |
| <input type="checkbox"/> Cefepime                     | <input type="checkbox"/> Fosfomycin            | <input type="checkbox"/> Saturated Solution of Potassium Iodide (SSKI)          |
| <input type="checkbox"/> Cefixime                     | <input type="checkbox"/> Gatifloxacin          | <input type="checkbox"/> Sparfloxacin                                           |
| <input type="checkbox"/> Cefmetazole                  | <input type="checkbox"/> Gemifloxacin          | <input type="checkbox"/> Spectinomycin                                          |
| <input type="checkbox"/> Cefonicid                    | <input type="checkbox"/> Gentamicin            | <input type="checkbox"/> Streptomycin                                           |
| <input type="checkbox"/> Cefoperazone                 | <input type="checkbox"/> Grepafloxacin         | <input type="checkbox"/> Sulfadiazine                                           |
| <input type="checkbox"/> Cefotaxime                   | <input type="checkbox"/> Imipenem/Cilastatin   | <input type="checkbox"/> Sulfamethoxazole                                       |
| <input type="checkbox"/> Cefotetan                    | <input type="checkbox"/> Imiquimod             | <input type="checkbox"/> Sulfisoxazole                                          |
| <input type="checkbox"/> Cefoxitin                    | <input type="checkbox"/> Kanamycin             | <input type="checkbox"/> Sulphur, precipitated in petrolatum                    |
| <input type="checkbox"/> Cefpodoxime Proxetil         | <input type="checkbox"/> Levofloxacin          |                                                                                 |
| <input type="checkbox"/> Cefprozil                    | <input type="checkbox"/> Lincomycin            | <input type="checkbox"/> TCA (trichloroacetic acid), BCA (bichloroacetic acid). |
| <input type="checkbox"/> Ceftaroline                  | <input type="checkbox"/> Linezolid             | <input type="checkbox"/> Teicoplanin                                            |
| <input type="checkbox"/> Ceftazidime                  | <input type="checkbox"/> Lomefloxacin          | <input type="checkbox"/> Telavancin                                             |
| <input type="checkbox"/> Ceftazidime/Avibactam        | <input type="checkbox"/> Loracarbef            | <input type="checkbox"/> Telithromycin                                          |
| <input type="checkbox"/> Ceftibuten                   | <input type="checkbox"/> Mafenide              | <input type="checkbox"/> Terbinafine                                            |
| <input type="checkbox"/> Ceftizoxime                  | <input type="checkbox"/> Meropenem             | <input type="checkbox"/> Tetracycline                                           |
| <input type="checkbox"/> Ceftobiprole                 | <input type="checkbox"/> Methenamine hippurate | <input type="checkbox"/> Ticarcillin                                            |
| <input type="checkbox"/> Ceftolozane/Tazobactam       | <input type="checkbox"/> Methicillin           | <input type="checkbox"/> Ticarcillin + Clavulanic Acid                          |
| <input type="checkbox"/> Ceftriaxone                  | <input type="checkbox"/> Metronidazole         | <input type="checkbox"/> Tigecycline                                            |
| <input type="checkbox"/> Cefuroxime                   | <input type="checkbox"/> Mezlocillin           | <input type="checkbox"/> Tobramycin                                             |
| <input type="checkbox"/> Cephalexin                   | <input type="checkbox"/> Minocycline           | <input type="checkbox"/> Trimethoprim                                           |
| <input type="checkbox"/> Cephalothin                  | <input type="checkbox"/> Moxifloxacin          | <input type="checkbox"/> Trimethoprim + Sulfamethoxazole                        |
| <input type="checkbox"/> Cephapirin                   | <input type="checkbox"/> Mupirocin             | <input type="checkbox"/> Trovafloxacin                                          |
| <input type="checkbox"/> Cephradine                   | <input type="checkbox"/> Nafcillin             | <input type="checkbox"/> Vancomycin                                             |
| <input type="checkbox"/> Chloramphenicol              | <input type="checkbox"/> Nalidixic Acid        |                                                                                 |
| <input type="checkbox"/> Cinoxacin                    | <input type="checkbox"/> Neomycin              |                                                                                 |
| <input type="checkbox"/> Ciprofloxacin                | <input type="checkbox"/> Netilmicin            |                                                                                 |
| <input type="checkbox"/> Clarithromycin               | <input type="checkbox"/> Nitrofurantoin        |                                                                                 |
| <input type="checkbox"/> Clindamycin                  | <input type="checkbox"/> Nitrofurazone         |                                                                                 |
|                                                       | <input type="checkbox"/> Norfloxacin           |                                                                                 |
|                                                       | <input type="checkbox"/> Novobiocin            |                                                                                 |

**3.36 CHEST X-RAY WITHIN 24h PRE or POST- ECMO CANNULATION:**

- Yes  
 No

**3.36a If yes to 3.36, Number of CHEST X-RAY quadrants with infiltrates:**

- 0
- 1
- 2
- 3
- 4
- Unknown

**4. DAILY CASE RECORD FORM (EOT Daily)****Option 1: 'FULL' daily data**

Complete the daily form every day of mechanical ventilation (ie. from mechanical ventilation commencement (intubation) to discontinuation of mechanical ventilation (extubation)). **Please commence this data the day after the patient is intubated.**

*Please collect all daily data retrospectively, at least 24h after the day of assessment, since the worst parameters of the 24-h period of assessment need to be identified.*

**Option 2: 'BASIC' data**

Complete this daily form:

1. Mechanical ventilation commencement
2. ECMO commencement
3. Four (4) days after ICU admission (only if the patient is mechanically ventilated or ECMO at that time)
4. Mechanical ventilation discontinuation.
5. ECMO discontinuation

*Please collect all daily data retrospectively, at least 24h after the day of assessment, since the worst parameters of the 24-h period of assessment need to be identified.*

**Importantly, parameters related to mechanical ventilation or ECMO will be active only when you click 'YES' in the field '1.17 Invasive ventilation' or when you click 'YES' in the field '1.18 ECLS', respectively, of the ISARIC "Daily Form".**

**4.1 DATE:** \_\_\_\_\_

**4.2 PATIENT POSITION:**

*'Full' daily data collection: Patient position applied most predominantly in the last 24 hours*

*'Basic' daily data collection: Patient position applied most predominantly since the last EOT Daily form*

- If this is the **'Four days after ICU admission'** timepoint, please collect the position applied most predominantly in the last 24 hours.

- Supine  
 Prone

**4.3 HIGHEST ECMO FLOW RATE IN THE LAST 24h (L/min):** \_\_\_\_\_

**4.4 HIGHEST ECMO GAS FLOW RATE IN THE LAST 24h (L/min):** \_\_\_\_\_

**4.5 ECMO CIRCUIT CHANGE:**

*'Full' daily data collection: Circuit change in the last 24 hours*

*'Basic' daily data collection: Circuit change since the last EOT Daily form*

- If this is the **'Four days after ICU admission'** timepoint, please answer with reference to the last 24 hours.

- Yes  
 No

#### 4.6 USE OF NEUROMUSCULAR BLOCKADE:

*'Full' daily data collection: Neuromuscular blockade in the last 24 hours*

*'Basic' daily data collection: Neuromuscular blockade since the last EOT Daily form*

- If this is the **'Four days after ICU admission'** timepoint, please answer with reference to the last 24 hours.
- Yes
- No

#### 4.7 USE OF RECRUITMENT MANOEUVRES:

*'Full' daily data collection: Recruitment manoeuvres in the last 24 hours*

*'Basic' daily data collection: Recruitment manoeuvres since the last EOT Daily form*

- If this is the **'Four days after ICU admission'** timepoint, please answer with reference to the last 24 hours.
- Yes
- No

#### 4.8 USE OF INHALED NITRIC OXIDE:

*'Full' daily data collection: Inhaled nitric oxide in the last 24 hours*

*'Basic' daily data collection: Inhaled nitric oxide since the last EOT Daily form*

- If this is the **'Four days after ICU admission'** timepoint, please answer with reference to the last 24 hours.
- Yes
- No

#### 4.9 MOST FREQUENT VENTILATORY MODE IN THE LAST 24h:

- Synchronized Intermittent Mandatory Ventilation – Volume-Controlled (SIMV-V)
- Synchronized Intermittent Mandatory Ventilation – Pressure-Controlled (SIMV-P)
- Volume Controlled Ventilation
- Pressure Controlled Ventilation
- Pressure Regulated Volume Control (PRVC)
- Airway Pressure Release Ventilation (APRV)
- Pressure Support Ventilation (PSV)
- Volume Support Ventilation (VSV)
- High Frequency Oscillatory (HFO)
- Bilevel Positive Airway Pressure (BiPAP)
- Continuous Positive Airway Pressure (CPAP)
- Proportional Assist Ventilation (PAV)
- Neurally Adjusted Ventilatory Assist (NAVA)
- Other: \_\_\_\_\_ (TEXT)



**MECHANICAL VENTILATION & BLOOD GAS ANALYSIS (Qs 4.10 – 4.21) – Please document the ‘worst’ value in the last 24 hours. ‘Worst’ means the values associated with the arterial blood gas with the lowest PaO<sub>2</sub>/FiO<sub>2</sub> ratio. Please report ventilatory settings associated with the worst arterial blood gas.**

**4.10 INSPIRATORY FRACTION OF OXYGEN IN THE LAST 24h:** \_\_\_\_\_ (ONLY NUMBERS, BETWEEN 21 and 100)

*Please document the values associated with the ‘worst’ blood gas analysis in the last 24 hours. ‘Worst’ is defined as the blood gas with the lowest PaO<sub>2</sub>/FiO<sub>2</sub> ratio.*

Not available

**4.11 RESPIRATORY RATE IN THE LAST 24h (breaths/min):** \_\_\_\_\_ (ONLY NUMBERS, BETWEEN 2 and 60)

*Please document the values associated with the ‘worst’ blood gas analysis in the last 24 hours. ‘Worst’ is defined as the blood gas with the lowest PaO<sub>2</sub>/FiO<sub>2</sub> ratio*

Not available

**4.12 TIDAL VOLUME IN THE LAST 24h (ml/Kg of Ideal Body Weight):** \_\_\_\_\_ (ONLY NUMBERS, BETWEEN 1 and 14)

*Please document the values associated with the ‘worst’ blood gas analysis in the last 24 hours. ‘Worst’ is defined as the blood gas with the lowest PaO<sub>2</sub>/FiO<sub>2</sub> ratio.*

*Ideal Body Weight formula:*

*Male patients:  $50 + (0.91 \times [\text{height in cm} - 152.4])$*

*Female patients:  $45.5 + (0.91 \times \{\text{height in cm} - 152.4\})$*

Not available

**4.13 POSITIVE END EXPIRATORY PRESSURE IN THE LAST 24h (cmH<sub>2</sub>O):** \_\_\_\_\_ (ONLY NUMBERS, BETWEEN 0 and 25)

*Please document the values associated with the ‘worst’ blood gas analysis in the last 24 hours. ‘Worst’ is defined as the blood gas with the lowest PaO<sub>2</sub>/FiO<sub>2</sub> ratio.*

Not available

**4.14 AIRWAY PLATEAU PRESSURE IN THE LAST 24h (cmH<sub>2</sub>O):** \_\_\_\_\_ (ONLY NUMBERS, BETWEEN 0 and 50)

*Please document the values associated with the ‘worst’ blood gas analysis in the last 24 hours. ‘Worst’ is defined as the blood gas with the lowest PaO<sub>2</sub>/FiO<sub>2</sub> ratio.*

Not available

**4.15 ARTERIAL pH IN THE LAST 24h:** \_\_\_\_\_ (ONLY NUMBERS FROM 6.500 TO 7.600)

*Please document the values associated with the ‘worst’ blood gas analysis in the last 24 hours. ‘Worst’ is defined as the blood gas with the lowest PaO<sub>2</sub>/FiO<sub>2</sub> ratio.*

Not available

**4.16 ARTERIAL PARTIAL PRESSURE OF OXYGEN IN THE LAST 24h:** \_\_\_\_\_ (ONLY NUMBERS FROM 20 TO 500)

Units:  mmHg  kPa

*Please document the values associated with the 'worst' blood gas analysis in the last 24 hours. 'Worst' is defined as the blood gas with the lowest PaO<sub>2</sub>/FiO<sub>2</sub> ratio.*

Not available

**4.17 ARTERIAL PARTIAL PRESSURE OF CARBON DIOXIDE IN THE LAST 24h:** \_\_\_\_\_ (ONLY NUMBERS FROM 10 TO 100)

Units:  mmHg  kPa

*Please document the values associated with the 'worst' blood gas analysis in the last 24 hours. 'Worst' is defined as the blood gas with the lowest PaO<sub>2</sub>/FiO<sub>2</sub> ratio.*

Not available

**4.18 ARTERIAL HCO<sub>3</sub><sup>-</sup> IN THE LAST 24h:** \_\_\_\_\_ (ONLY NUMBERS FROM 1 TO 50)

Units:  mEq/L  mmol/L

*Please document the values associated with the 'worst' blood gas analysis in the last 24 hours. 'Worst' is defined as the blood gas with the lowest PaO<sub>2</sub>/FiO<sub>2</sub> ratio.*

Not available

**4.19 ARTERIAL Base excess IN THE LAST 24h:** \_\_\_\_\_ mmol/L (ONLY NUMBERS FROM -50 TO +50)

*Please document the values associated with the 'worst' blood gas analysis in the last 24 hours. 'Worst' is defined as the blood gas with the lowest PaO<sub>2</sub>/FiO<sub>2</sub> ratio.*

**4.20 Lactate IN THE LAST 24h:** \_\_\_\_\_ mmol/L

*Please document the values associated with the 'worst' blood gas analysis in the last 24 hours. 'Worst' is defined as the blood gas with the lowest PaO<sub>2</sub>/FiO<sub>2</sub> ratio.*

*If this data has already been entered in the 'Daily Case Report Form – Laboratory Results' section of the ISARIC CRF, please DO NOT re-enter the data here. Please leave '4.20 Lactate' blank.*

**4.21 CREATININE IN THE LAST 24h :** \_\_\_\_\_

Units:  mg/dL  μmol/L

*Please document the values associated with the 'worst' blood gas analysis in the last 24 hours. 'Worst' is defined as the blood gas with the lowest PaO<sub>2</sub>/FiO<sub>2</sub> ratio.*

- Not available

*If this data has already been entered in the 'Daily Case Report Form – Laboratory Results' section of the ISARIC CRF, please DO NOT re-enter the data here. Please leave '4.21 Creatinine' blank.*

**4.22 USE OF CONTINUOUS RENAL REPLACEMENT THERAPY (CRRT):**

*'Full' daily data collection: CRRT in the last 24 hours*

*'Basic' daily data collection: CRRT since the last EOT Daily form*

- *If this is the 'Four days after ICU admission' timepoint, please answer with reference to the last 24 hours.*

- Yes  
 No

**4.23 USE OF VASOACTIVE DRUGS IN THE LAST 24h:**

- Yes  
 No

**4.24 TYPE OF VASOACTIVE DRUG 1:**

- Dobutamine   
 Dopamine   
 Enoximone   
 Epinephrine: YES  NO   
 Esmolol   
 Levosimendan   
 Metaraminol   
 Metoprolol   
 Milrinone   
 Nicardipine   
 Nitroglycerin   
 Nitroprusside   
 Norepinephrine: YES  NO   
 Phenylephrine   
 Tolazoline   
 Vasopressin

**4.25 HIGHEST DOSE OF VASOACTIVE DRUG 1 IN THE LAST 24h (mcg/Kg/min):** \_\_\_\_\_

**4.26 TYPE OF VASOACTIVE DRUG 2:**

- Dobutamine   
 Dopamine   
 Enoximone   
 Epinephrine: YES  NO   
 Esmolol   
 Levosimendan   
 Metaraminol   
 Metoprolol   
 Milrinone

- Nicardipine
- Nitroglycerin
- Nitroprusside
- Norepinephrine: YES  NO
- Phenylephrine
- Tolazoline
- Vasopressin

**4.27 HIGHEST DOSE OF VASOACTIVE DRUG 2 IN THE LAST 24h (mcg/Kg/min):** \_\_\_\_\_

**4.28 TYPE OF VASOACTIVE DRUG 3:**

- Dobutamine
- Dopamine
- Enoximone
- Epinephrine: YES  NO
- Esmolol
- Levosimendan
- Metaraminol
- Metoprolol
- Milrinone
- Nicardipine
- Nitroglycerin
- Nitroprusside
- Norepinephrine: YES  NO
- Phenylephrine
- Tolazoline
- Vasopressin

**4.29 HIGHEST DOSE OF VASOACTIVE DRUG 3 IN THE LAST 24h (mcg/Kg/min):** \_\_\_\_\_

**4.30 USE OF CARDIAC ASSIST DEVICES:**

*'Full' daily data collection: Cardiac assist device use in the last 24 hours*

*'Basic' daily data collection: Cardiac assist device use since the last EOT Daily form*

- If this is the **'Four days after ICU admission'** timepoint, please answer with reference to the last 24 hours.

- Yes
- No

**4.31 USE OF ANTIBIOTICS:**

*'Full' daily data collection: Antibiotics administered in the last 24 hours*

*'Basic' daily data collection: Antibiotics administered since the last EOT Daily form*

- If this is the **'Four days after ICU admission'** timepoint, please answer with reference to the last 24 hours.

- Yes
- No

ANTIBIOTICS:

- |                                                       |                                                |                                                                                 |
|-------------------------------------------------------|------------------------------------------------|---------------------------------------------------------------------------------|
| <input type="checkbox"/> Amikacin                     | <input type="checkbox"/> Cinoxacin             | <input type="checkbox"/> Nitrofurazone                                          |
| <input type="checkbox"/> Amoxicillin                  | <input type="checkbox"/> Ciprofloxacin         | <input type="checkbox"/> Norfloxacin                                            |
| <input type="checkbox"/> Amoxicillin + Clavulanate    | <input type="checkbox"/> Clarithromycin        | <input type="checkbox"/> Novobiocin                                             |
| <input type="checkbox"/> Ampicillin                   | <input type="checkbox"/> Clindamycin           | <input type="checkbox"/> Ofloxacin                                              |
| <input type="checkbox"/> Ampicillin + Sulbactam       | <input type="checkbox"/> Cloxacillin           | <input type="checkbox"/> Oxacillin                                              |
| <input type="checkbox"/> Atovaquone                   | <input type="checkbox"/> Colistimethate        | <input type="checkbox"/> Oxytetracycline                                        |
| <input type="checkbox"/> Azithromycin                 | <input type="checkbox"/> Cycloserine           | <input type="checkbox"/> Penicillin                                             |
| <input type="checkbox"/> Aztreonam                    | <input type="checkbox"/> Daptomycin            | <input type="checkbox"/> Piperacillin                                           |
| <input type="checkbox"/> Bacampicillin                | <input type="checkbox"/> Demeclocycline        | <input type="checkbox"/> Piperacillin + Tazobactam                              |
| <input type="checkbox"/> Bacitracin                   | <input type="checkbox"/> Dicloxacillin         | <input type="checkbox"/> Podoflox                                               |
| <input type="checkbox"/> Capreomycin                  | <input type="checkbox"/> Dirithromycin         | <input type="checkbox"/> Polymyxin B                                            |
| <input type="checkbox"/> Carbenicillin indanyl sodium | <input type="checkbox"/> Doripenem             | <input type="checkbox"/> Quinupristin + Dalfopristin                            |
| <input type="checkbox"/> Cefaclor                     | <input type="checkbox"/> Doxycycline           | <input type="checkbox"/> Retapamulin                                            |
| <input type="checkbox"/> Cefadroxil                   | <input type="checkbox"/> Enoxacin              | <input type="checkbox"/> Rifapentine                                            |
| <input type="checkbox"/> Cefamandole                  | <input type="checkbox"/> Ertapenem             | <input type="checkbox"/> Rifaximin                                              |
| <input type="checkbox"/> Cefazolin                    | <input type="checkbox"/> Erythromycin          | <input type="checkbox"/> Saturated Solution of Potassium Iodide (SSKI)          |
| <input type="checkbox"/> Cefdinir                     | <input type="checkbox"/> Fosfomycin            | <input type="checkbox"/> Sparfloxacin                                           |
| <input type="checkbox"/> Cefditoren                   | <input type="checkbox"/> Gatifloxacin          | <input type="checkbox"/> Spectinomycin                                          |
| <input type="checkbox"/> Cefepime                     | <input type="checkbox"/> Gemifloxacin          | <input type="checkbox"/> Streptomycin                                           |
| <input type="checkbox"/> Cefixime                     | <input type="checkbox"/> Gentamicin            | <input type="checkbox"/> Sulfadiazine                                           |
| <input type="checkbox"/> Cefmetazole                  | <input type="checkbox"/> Grepafloxacin         | <input type="checkbox"/> Sulfamethoxazole                                       |
| <input type="checkbox"/> Cefonicid                    | <input type="checkbox"/> Imipenem/Cilastatin   | <input type="checkbox"/> Sulfoxazole                                            |
| <input type="checkbox"/> Cefoperazone                 | <input type="checkbox"/> Imiquimod             | <input type="checkbox"/> Sulphur, precipitated in petrolatum                    |
| <input type="checkbox"/> Cefotaxime                   | <input type="checkbox"/> Kanamycin             | <input type="checkbox"/> TCA (trichloroacetic acid), BCA (bichloroacetic acid). |
| <input type="checkbox"/> Cefotetan                    | <input type="checkbox"/> Levofloxacin          | <input type="checkbox"/> Teicoplanin                                            |
| <input type="checkbox"/> Cefoxitin                    | <input type="checkbox"/> Lincomycin            | <input type="checkbox"/> Telavancin                                             |
| <input type="checkbox"/> Cefpodoxime Proxetil         | <input type="checkbox"/> Linezolid             | <input type="checkbox"/> Telithromycin                                          |
| <input type="checkbox"/> Cefprozil                    | <input type="checkbox"/> Lomefloxacin          | <input type="checkbox"/> Terbinafine                                            |
| <input type="checkbox"/> Ceftaroline                  | <input type="checkbox"/> Loracarbef            | <input type="checkbox"/> Tetracycline                                           |
| <input type="checkbox"/> Ceftazidime                  | <input type="checkbox"/> Mafenide              | <input type="checkbox"/> Ticarcillin                                            |
| <input type="checkbox"/> Ceftazidime/Avibactam        | <input type="checkbox"/> Meropenem             | <input type="checkbox"/> Ticarcillin + Clavulanic Acid                          |
| <input type="checkbox"/> Ceftibuten                   | <input type="checkbox"/> Methenamine hippurate | <input type="checkbox"/> Tigecycline                                            |
| <input type="checkbox"/> Ceftizoxime                  | <input type="checkbox"/> Methicillin           | <input type="checkbox"/> Tobramycin                                             |
| <input type="checkbox"/> Ceftobiprole                 | <input type="checkbox"/> Metronidazole         | <input type="checkbox"/> Trimethoprim                                           |
| <input type="checkbox"/> Ceftolozane/Tazobactam       | <input type="checkbox"/> Mezlocillin           | <input type="checkbox"/> Trimethoprim + Sulfamethoxazole                        |
| <input type="checkbox"/> Ceftriaxone                  | <input type="checkbox"/> Minocycline           | <input type="checkbox"/> Trovafloxacin                                          |
| <input type="checkbox"/> Cefuroxime                   | <input type="checkbox"/> Moxifloxacin          | <input type="checkbox"/> Vancomycin                                             |
| <input type="checkbox"/> Cephalexin                   | <input type="checkbox"/> Mupirocin             |                                                                                 |
| <input type="checkbox"/> Cephalothin                  | <input type="checkbox"/> Nafcillin             |                                                                                 |
| <input type="checkbox"/> Cephapirin                   | <input type="checkbox"/> Nalidixic Acid        |                                                                                 |
| <input type="checkbox"/> Cephadrine                   | <input type="checkbox"/> Neomycin              |                                                                                 |
| <input type="checkbox"/> Chloramphenicol              | <input type="checkbox"/> Netilmicin            |                                                                                 |
|                                                       | <input type="checkbox"/> Nitrofurantoin        |                                                                                 |

**4.32 Haemoglobin IN THE LAST 24h** g/dL \_\_\_\_\_

- 
- Not available

*If this data has already been entered in the 'Daily Case Report Form – Laboratory Results' section of the ISARIC CRF, please DO NOT re-enter the data here. Please leave '4.32 Haemoglobin' blank.*

**4.33 White Blood Cells IN THE LAST 24h**

- 
- Not available

*If this data has already been entered in the 'Daily Case Report Form – Laboratory Results' section of the ISARIC CRF, please DO NOT re-enter the data here. Please leave '4.33 White Blood Cells' blank.*

**4.34 White Blood Cells Unit**

- 
- X 10
- <sup>9</sup>
- /L
- 
- 
- X 10
- <sup>3</sup>
- /microL

**4.35 AST/SGOT IN THE LAST 24h** U/L \_\_\_\_\_

- 
- Not available

*If this data has already been entered in the 'Daily Case Report Form – Laboratory Results' section of the ISARIC CRF, please DO NOT re-enter the data here. Please leave '4.34 AST' blank.*

**4.36 ALT/SGPT IN THE LAST 24h** U/L \_\_\_\_\_

- 
- Not available

*If this data has already been entered in the 'Daily Case Report Form – Laboratory Results' section of the ISARIC CRF, please DO NOT re-enter the data here. Please leave '4.36 ALT' blank.*

**4.37 ANTICOAGULANTS:**

*'Full' daily data collection: Anticoagulants administered in the last 24 hours*

*'Basic' daily data collection: Anticoagulants administered since the last EOT Daily form*

- *If this is the 'Four days after ICU admission' timepoint, please answer with reference to the last 24 hours.*  
 Yes  
 No

**4.38 TYPE OF ANTICOAGULANTS:**

*'Full' daily data collection: Anticoagulants administered in the last 24 hours*

*'Basic' daily data collection: Anticoagulants administered since the last EOT Daily form*

- *If this is the 'Four days after ICU admission' timepoint, please answer with reference to the last 24 hours.*  
 Continuous infusion of unfractionated heparin  
 Subcutaneous unfractionated heparin only  
 Low molecular heparin

- Danaparoid Lepirudin
- Argatroban
- Hirulog and bivalirudin
- Desirudin
- Nafamostat Mesilate
- Other

#### 4.39 TRANSFUSED PACKED RED BLOOD CELL (PRBC) CONCENTRATE:

'Full' daily data collection: PRBCs administered **in the last 24 hours**

'Basic' daily data collection: PRBCs administered **since the last EOT Daily form**

- If this is the **'Four days after ICU admission'** timepoint, please answer with reference to the last 24 hours
- Yes
  - No

#### 4.40 TRANSFUSED PLATELETS CONCENTRATE:

'Full' daily data collection: Platelets administered **in the last 24 hours**

'Basic' daily data collection: Platelets administered **since the last EOT Daily form**

- If this is the **'Four days after ICU admission'** timepoint, please answer with reference to the last 24 hours
- Yes
  - No

#### 4.41 TRANSFUSED FRESH FROZEN PLASMA (FFP):

'Full' daily data collection: FFP administered **in the last 24 hours**

'Basic' daily data collection: FFP administered **since the last EOT Daily form**

- If this is the **'Four days after ICU admission'** timepoint, please answer with reference to the last 24 hours
- Yes
  - No

#### 4.42 TRANSFUSED CRYOPRECIPITATES:

'Full' daily data collection: Cryoprecipitate administered **in the last 24 hours**

'Basic' daily data collection: Cryoprecipitate administered **since the last EOT Daily form**

- If this is the **'Four days after ICU admission'** timepoint, please answer with reference to the last 24 hours
- Yes
  - No

#### 4.43 INFECTION COMPLICATION 1:

'Full' daily data collection: Infectious complications diagnosed **in the last 24 hours**

'Basic' daily data collection: Infectious complications diagnosed **since the last EOT Daily form**

- If this is the 'Four days after ICU admission' timepoint, please answer with reference to the last 24 hours
- Yes
- No

**4.44 INFECTION COMPLICATION 1 DATE OF DIAGNOSIS:**

\_\_\_ / \_\_\_ / \_\_\_\_ (DD/MM/YYYY)

**4.45 SOURCE OF INFECTIOUS COMPLICATION 1**

- |                                               |                                                  |                                      |
|-----------------------------------------------|--------------------------------------------------|--------------------------------------|
| <input type="checkbox"/> Lungs                | <input type="checkbox"/> Central nervous system  | <input type="checkbox"/> Cardiac     |
| <input type="checkbox"/> Gastro-intestinal    | <input type="checkbox"/> Osteoarticular and bone | <input type="checkbox"/> Bloodstream |
| <input type="checkbox"/> Genito-urinary       |                                                  | <input type="checkbox"/> Not known   |
| <input type="checkbox"/> Skin and soft tissue |                                                  |                                      |

**4.46 CAUSATIVE PATHOGEN 1:**

- |                                                            |                                                                          |                                                                   |
|------------------------------------------------------------|--------------------------------------------------------------------------|-------------------------------------------------------------------|
| <input type="checkbox"/> Acinetobacter baumannii           | <input type="checkbox"/> Eikenella corrodens                             | <input type="checkbox"/> Mycobacterium chelonae                   |
| <input type="checkbox"/> Actinomyces                       | <input type="checkbox"/> Enterobacter species                            | <input type="checkbox"/> Mycobacterium fortuitum                  |
| <input type="checkbox"/> Aeromonas                         | <input type="checkbox"/> Enterococcus                                    | <input type="checkbox"/> Mycobacterium gordonae                   |
| <input type="checkbox"/> Bacillus anthracis                | <input type="checkbox"/> Erysipelothrix rhusiopathiae                    | <input type="checkbox"/> Mycobacterium kansasii                   |
| <input type="checkbox"/> Bacillus species                  | <input type="checkbox"/> Escherichia coli                                | <input type="checkbox"/> Mycobacterium leprae                     |
| <input type="checkbox"/> Bacteroides fragilis              | <input type="checkbox"/> Francisella tularensis                          | <input type="checkbox"/> Mycobacterium marinum                    |
| <input type="checkbox"/> Bacteroides species               | <input type="checkbox"/> Haemophilus ducreyi (Chancroid)                 | <input type="checkbox"/> Mycobacterium scrofulaceum               |
| <input type="checkbox"/> Bartonella species                | <input type="checkbox"/> Haemophilus influenzae                          | <input type="checkbox"/> Mycobacterium tuberculosis               |
| <input type="checkbox"/> Bordetella species                | <input type="checkbox"/> Helicobacter cinaedi and related species        | <input type="checkbox"/> Mycobacterium ulcerans                   |
| <input type="checkbox"/> Borrelia burgdorferi              | <input type="checkbox"/> Helicobacter pylori                             | <input type="checkbox"/> Mycobacterium xenopi                     |
| <input type="checkbox"/> Borrelia species                  | <input type="checkbox"/> Klebsiella granulomatis (Antibiotic Guide)      | <input type="checkbox"/> Mycoplasma pneumoniae (Antibiotic Guide) |
| <input type="checkbox"/> Brucella Species                  | <input type="checkbox"/> Klebsiella species                              | <input type="checkbox"/> Neisseria gonorrhoeae                    |
| <input type="checkbox"/> Burkholderia cepacia              | <input type="checkbox"/> ESBL Klebsiella pneumoniae                      | <input type="checkbox"/> Neisseria meningitidis                   |
| <input type="checkbox"/> Burkholderia mallei               | <input type="checkbox"/> Lactobacillus                                   | <input type="checkbox"/> Nocardia                                 |
| <input type="checkbox"/> Burkholderia pseudomallei         | <input type="checkbox"/> Legionella pneumophila                          | <input type="checkbox"/> Other atypical mycobacteria              |
| <input type="checkbox"/> Campylobacter and related species | <input type="checkbox"/> Legionella species                              | <input type="checkbox"/> Pasteurella multocida                    |
| <input type="checkbox"/> Campylobacter jejuni              | <input type="checkbox"/> Leptospira interrogans                          | <input type="checkbox"/> Peptostreptococcus/Peptococcus           |
| <input type="checkbox"/> Capnocytophaga canimorsus         | <input type="checkbox"/> Listeria monocytogenes                          | <input type="checkbox"/> Plesiomonas                              |
| <input type="checkbox"/> Chlamydia trachomatis             | <input type="checkbox"/> Lymphogranuloma venereum (LGV)                  | <input type="checkbox"/> Propionibacterium species                |
| <input type="checkbox"/> Chlamydomphila pneumoniae         | <input type="checkbox"/> Methicillin Resistant Staphylococcus aureus     | <input type="checkbox"/> Proteus species                          |
| <input type="checkbox"/> Chlamydomphila psittaci           | <input type="checkbox"/> Moraxella catarrhalis                           | <input type="checkbox"/> Providencia                              |
| <input type="checkbox"/> Citrobacter species               | <input type="checkbox"/> Morganella                                      | <input type="checkbox"/> Pseudomonas aeruginosa                   |
| <input type="checkbox"/> Clostridium botulinum             | <input type="checkbox"/> Mycobacterium abscessus                         | <input type="checkbox"/> Rhodococcus equi                         |
| <input type="checkbox"/> Clostridium difficile             | <input type="checkbox"/> Mycobacterium avium-complex (MAC, MAI, non-HIV) |                                                                   |
| <input type="checkbox"/> Clostridium species               |                                                                          |                                                                   |
| <input type="checkbox"/> Clostridium tetani (Tetanus)      |                                                                          |                                                                   |
| <input type="checkbox"/> Corynebacterium diphtheriae       |                                                                          |                                                                   |
| <input type="checkbox"/> Coxiella burnetii                 |                                                                          |                                                                   |
| <input type="checkbox"/> Ehrlichia species                 |                                                                          |                                                                   |



- |                                                            |                                                                     |                                                  |
|------------------------------------------------------------|---------------------------------------------------------------------|--------------------------------------------------|
| <input type="checkbox"/> Rickettsia rickettsii             | <input type="checkbox"/> Vancomycin Resistant Enterococcus species  | <input type="checkbox"/> Candida tropicalis      |
| <input type="checkbox"/> Rickettsia species                | <input type="checkbox"/> Vancomycin Resistant Staphylococcus aureus | <input type="checkbox"/> Chromomycosis           |
| <input type="checkbox"/> Salmonella species                | <input type="checkbox"/> Vibrio cholerae                            | <input type="checkbox"/> Coccidioides immitis    |
| <input type="checkbox"/> Serratia species                  | <input type="checkbox"/> Vibrio species (noncholera)                | <input type="checkbox"/> Cryptococcus neoformans |
| <input type="checkbox"/> Shigella dysenteriae              | <input type="checkbox"/> Yersinia pestis                            | <input type="checkbox"/> Cunninghamella          |
| <input type="checkbox"/> Shigella species                  | <input type="checkbox"/> Yersinia species (non-plague)              | <input type="checkbox"/> Dermatophytes           |
| <input type="checkbox"/> Staphylococci, coagulase negative | <input type="checkbox"/> Absidia                                    | <input type="checkbox"/> Fusarium                |
| <input type="checkbox"/> Staphylococcus aureus             | <input type="checkbox"/> Aspergillus                                | <input type="checkbox"/> Histoplasma capsulatum  |
| <input type="checkbox"/> Stenotrophomonas maltophilia      | <input type="checkbox"/> Basidiobolomycosis                         | <input type="checkbox"/> Mucor                   |
| <input type="checkbox"/> Streptobacillus moniliformis      | <input type="checkbox"/> Blastomyces dermatitidis                   | <input type="checkbox"/> Mycetoma                |
| <input type="checkbox"/> Streptococcus pneumoniae          | <input type="checkbox"/> Candida albicans                           | <input type="checkbox"/> Pneumocystis carinii    |
| <input type="checkbox"/> Streptococcus pyogenes (Group A)  | <input type="checkbox"/> Candida glabrata                           | <input type="checkbox"/> Pneumocystis jirovecii  |
| <input type="checkbox"/> Streptococcus species             | <input type="checkbox"/> Candida guilliermondii                     | <input type="checkbox"/> Pseudallescheria boydii |
| <input type="checkbox"/> Treponema pallidum (syphilis)     | <input type="checkbox"/> Candida krusei                             | <input type="checkbox"/> Rhizomucor              |
| <input type="checkbox"/> Tropheryma whipplei               | <input type="checkbox"/> Candida lusitanae                          | <input type="checkbox"/> Rhizopus                |
|                                                            | <input type="checkbox"/> Candida parapsilosis                       | <input type="checkbox"/> Saksanea                |
|                                                            | <input type="checkbox"/> Candida species                            | <input type="checkbox"/> Sporothrix schenckii    |
|                                                            |                                                                     | <input type="checkbox"/> Zygomycetes             |

#### 4.47 INFECTION COMPLICATION 2:

*'Full' daily data collection: Infectious complications diagnosed in the last 24 hours*

*'Basic' daily data collection: Infectious complications diagnosed since the last EOT Daily form*

- If this is the **'Four days after ICU admission'** timepoint, please answer with reference to the last 24 hours
- Yes
- No

#### 4.48 INFECTION COMPLICATION 2 DATE OF DIAGNOSIS:

\_\_\_ / \_\_\_ / \_\_\_\_ (DD/MM/YYYY)

#### 4.49 SOURCE OF INFECTIOUS COMPLICATION 2:

- |                                               |                                                  |                                      |
|-----------------------------------------------|--------------------------------------------------|--------------------------------------|
| <input type="checkbox"/> Lungs                | <input type="checkbox"/> Central nervous system  | <input type="checkbox"/> Cardiac     |
| <input type="checkbox"/> Gastro-intestinal    | <input type="checkbox"/> Osteoarticular and bone | <input type="checkbox"/> Bloodstream |
| <input type="checkbox"/> Genito-urinary       |                                                  | <input type="checkbox"/> Not known   |
| <input type="checkbox"/> Skin and soft tissue |                                                  |                                      |

#### 4.50 CAUSATIVE PATHOGEN 2:

- |                                                  |                                                    |                                                            |
|--------------------------------------------------|----------------------------------------------------|------------------------------------------------------------|
| <input type="checkbox"/> Acinetobacter baumannii | <input type="checkbox"/> Bordetella species        | <input type="checkbox"/> Campylobacter and related species |
| <input type="checkbox"/> Actinomyces             | <input type="checkbox"/> Borrelia burgdorferi      | <input type="checkbox"/> Campylobacter jejuni              |
| <input type="checkbox"/> Aeromonas               | <input type="checkbox"/> Borrelia species          | <input type="checkbox"/> Capnocytophaga canimorsus         |
| <input type="checkbox"/> Bacillus anthracis      | <input type="checkbox"/> Brucella Species          | <input type="checkbox"/> Chlamydia trachomatis             |
| <input type="checkbox"/> Bacillus species        | <input type="checkbox"/> Burkholderia cepacia      | <input type="checkbox"/> Chlamydomphila pneumoniae         |
| <input type="checkbox"/> Bacteroides fragilis    | <input type="checkbox"/> Burkholderia mallei       |                                                            |
| <input type="checkbox"/> Bacteroides species     | <input type="checkbox"/> Burkholderia pseudomallei |                                                            |
| <input type="checkbox"/> Bartonella species      |                                                    |                                                            |

- |                                                                          |                                                                   |                                                                     |
|--------------------------------------------------------------------------|-------------------------------------------------------------------|---------------------------------------------------------------------|
| <input type="checkbox"/> Chlamydomphila psittaci                         | <input type="checkbox"/> Mycobacterium fortuitum                  | <input type="checkbox"/> Streptococcus pyogenes (Group A)           |
| <input type="checkbox"/> Citrobacter species                             | <input type="checkbox"/> Mycobacterium gordonae                   | <input type="checkbox"/> Streptococcus species                      |
| <input type="checkbox"/> Clostridium botulinum                           | <input type="checkbox"/> Mycobacterium kansasii                   | <input type="checkbox"/> Treponema pallidum (syphilis)              |
| <input type="checkbox"/> Clostridium difficile                           | <input type="checkbox"/> Mycobacterium leprae                     | <input type="checkbox"/> Tropheryma whipplei                        |
| <input type="checkbox"/> Clostridium species                             | <input type="checkbox"/> Mycobacterium marinum                    | <input type="checkbox"/> Vancomycin Resistant Enterococcus species  |
| <input type="checkbox"/> Clostridium tetani (Tetanus)                    | <input type="checkbox"/> Mycobacterium scrofulaceum               | <input type="checkbox"/> Vancomycin Resistant Staphylococcus aureus |
| <input type="checkbox"/> Corynebacterium diphtheriae                     | <input type="checkbox"/> Mycobacterium tuberculosis               | <input type="checkbox"/> Vibrio cholerae                            |
| <input type="checkbox"/> Coxiella burnetii                               | <input type="checkbox"/> Mycobacterium ulcerans                   | <input type="checkbox"/> Vibrio species (noncholera)                |
| <input type="checkbox"/> Ehrlichia species                               | <input type="checkbox"/> Mycobacterium xenopi                     | <input type="checkbox"/> Yersinia pestis                            |
| <input type="checkbox"/> Eikenella corrodens                             | <input type="checkbox"/> Mycoplasma pneumoniae (Antibiotic Guide) | <input type="checkbox"/> Yersinia species (non-plague)              |
| <input type="checkbox"/> Enterobacter species                            | <input type="checkbox"/> Neisseria gonorrhoeae                    | <input type="checkbox"/> Absidia                                    |
| <input type="checkbox"/> Enterococcus                                    | <input type="checkbox"/> Neisseria meningitidis                   | <input type="checkbox"/> Aspergillus                                |
| <input type="checkbox"/> Erysipelothrix rhusiopathiae                    | <input type="checkbox"/> Nocardia                                 | <input type="checkbox"/> Basidiobolomycosis                         |
| <input type="checkbox"/> Escherichia coli                                | <input type="checkbox"/> Other atypical mycobacteria              | <input type="checkbox"/> Blastomyces dermatitidis                   |
| <input type="checkbox"/> Francisella tularensis                          | <input type="checkbox"/> Pasteurella multocida                    | <input type="checkbox"/> Candida albicans                           |
| <input type="checkbox"/> Haemophilus ducreyi (Chancroid)                 | <input type="checkbox"/> Peptostreptococcus/Peptococcus           | <input type="checkbox"/> Candida glabrata                           |
| <input type="checkbox"/> Haemophilus influenzae                          | <input type="checkbox"/> Plesiomonas                              | <input type="checkbox"/> Candida guilliermondii                     |
| <input type="checkbox"/> Helicobacter cinaedi and related species        | <input type="checkbox"/> Propionibacterium species                | <input type="checkbox"/> Candida krusei                             |
| <input type="checkbox"/> Helicobacter pylori                             | <input type="checkbox"/> Proteus species                          | <input type="checkbox"/> Candida lusitaniae                         |
| <input type="checkbox"/> Klebsiella granulomatis (Antibiotic Guide)      | <input type="checkbox"/> Providencia                              | <input type="checkbox"/> Candida parapsilosis                       |
| <input type="checkbox"/> Klebsiella species                              | <input type="checkbox"/> Pseudomonas aeruginosa                   | <input type="checkbox"/> Candida species                            |
| <input type="checkbox"/> ESBL Klebsiella pneumoniae                      | <input type="checkbox"/> Rhodococcus equi                         | <input type="checkbox"/> Candida tropicalis                         |
| <input type="checkbox"/> Lactobacillus                                   | <input type="checkbox"/> Rickettsia rickettsii                    | <input type="checkbox"/> Chromomycosis                              |
| <input type="checkbox"/> Legionella pneumophila                          | <input type="checkbox"/> Rickettsia species                       | <input type="checkbox"/> Coccidioides immitis                       |
| <input type="checkbox"/> Legionella species                              | <input type="checkbox"/> Salmonella species                       | <input type="checkbox"/> Cryptococcus neoformans                    |
| <input type="checkbox"/> Leptospira interrogans                          | <input type="checkbox"/> Serratia species                         | <input type="checkbox"/> Cunninghamella                             |
| <input type="checkbox"/> Listeria monocytogenes                          | <input type="checkbox"/> Shigella dysenteriae                     | <input type="checkbox"/> Dermatophytes                              |
| <input type="checkbox"/> Lymphogranuloma venereum (LGV)                  | <input type="checkbox"/> Shigella species                         | <input type="checkbox"/> Fusarium                                   |
| <input type="checkbox"/> Methicillin Resistant Staphylococcus aureus     | <input type="checkbox"/> Staphylococci, coagulase negative        | <input type="checkbox"/> Histoplasma capsulatum                     |
| <input type="checkbox"/> Moraxella catarrhalis                           | <input type="checkbox"/> Staphylococcus aureus                    | <input type="checkbox"/> Mucor                                      |
| <input type="checkbox"/> Morganella                                      | <input type="checkbox"/> Stenotrophomonas maltophilia             | <input type="checkbox"/> Mycetoma                                   |
| <input type="checkbox"/> Mycobacterium abscessus                         | <input type="checkbox"/> Streptobacillus moniliformis             | <input type="checkbox"/> Pneumocystis carinii                       |
| <input type="checkbox"/> Mycobacterium avium-complex (MAC, MAI, non-HIV) | <input type="checkbox"/> Streptococcus pneumoniae                 | <input type="checkbox"/> Pneumocystis jirovecii                     |
| <input type="checkbox"/> Mycobacterium chelonae                          |                                                                   | <input type="checkbox"/> Pseudallescheria boydii                    |
|                                                                          |                                                                   | <input type="checkbox"/> Rhizomucor                                 |
|                                                                          |                                                                   | <input type="checkbox"/> Rhizopus                                   |
|                                                                          |                                                                   | <input type="checkbox"/> Saksanea                                   |
|                                                                          |                                                                   | <input type="checkbox"/> Sporothrix schenckii                       |
|                                                                          |                                                                   | <input type="checkbox"/> Zygomycetes                                |

#### 4.51 INFECTION COMPLICATION 3:

*'Full' daily data collection: Infectious complications diagnosed in the last 24 hours*

*'Basic' daily data collection: Infectious complications diagnosed since the last EOT Daily form*

- If this is the **'Four days after ICU admission'** timepoint, please answer with reference to the last 24 hours
  - Yes
  - No

#### 4.52 INFECTION COMPLICATION 3 DATE OF DIAGNOSIS:

\_\_\_ / \_\_\_ / \_\_\_\_ (DD/MM/YYYY)

#### 4.53 SOURCE OF INFECTIOUS COMPLICATION 3:

- |                                               |                                                  |                                      |
|-----------------------------------------------|--------------------------------------------------|--------------------------------------|
| <input type="checkbox"/> Lungs                | <input type="checkbox"/> Central nervous system  | <input type="checkbox"/> Cardiac     |
| <input type="checkbox"/> Gastro-intestinal    | <input type="checkbox"/> Osteoarticular and bone | <input type="checkbox"/> Bloodstream |
| <input type="checkbox"/> Genito-urinary       |                                                  | <input type="checkbox"/> Not known   |
| <input type="checkbox"/> Skin and soft tissue |                                                  |                                      |

#### 4.54 CAUSATIVE PATHOGEN 3:

- |                                                            |                                                                      |                                                                          |
|------------------------------------------------------------|----------------------------------------------------------------------|--------------------------------------------------------------------------|
| <input type="checkbox"/> Acinetobacter baumannii           | <input type="checkbox"/> Coxiella burnetii                           | <input type="checkbox"/> Mycobacterium avium-complex (MAC, MAI, non-HIV) |
| <input type="checkbox"/> Actinomyces                       | <input type="checkbox"/> Ehrlichia species                           | <input type="checkbox"/> Mycobacterium chelonae                          |
| <input type="checkbox"/> Aeromonas                         | <input type="checkbox"/> Eikenella corrodens                         | <input type="checkbox"/> Mycobacterium fortuitum                         |
| <input type="checkbox"/> Bacillus anthracis                | <input type="checkbox"/> Enterobacter species                        | <input type="checkbox"/> Mycobacterium gordonae                          |
| <input type="checkbox"/> Bacillus species                  | <input type="checkbox"/> Enterococcus                                | <input type="checkbox"/> Mycobacterium kansasii                          |
| <input type="checkbox"/> Bacteroides fragilis              | <input type="checkbox"/> Erysipelothrix rhusiopathiae                | <input type="checkbox"/> Mycobacterium leprae                            |
| <input type="checkbox"/> Bacteroides species               | <input type="checkbox"/> Escherichia coli                            | <input type="checkbox"/> Mycobacterium marinum                           |
| <input type="checkbox"/> Bartonella species                | <input type="checkbox"/> Francisella tularensis                      | <input type="checkbox"/> Mycobacterium scrofulaceum                      |
| <input type="checkbox"/> Bordetella species                | <input type="checkbox"/> Haemophilus ducreyi (Chancroid)             | <input type="checkbox"/> Mycobacterium tuberculosis                      |
| <input type="checkbox"/> Borrelia burgdorferi              | <input type="checkbox"/> Haemophilus influenzae                      | <input type="checkbox"/> Mycobacterium ulcerans                          |
| <input type="checkbox"/> Borrelia species                  | <input type="checkbox"/> Helicobacter cinaedi and related species    | <input type="checkbox"/> Mycobacterium xenopi                            |
| <input type="checkbox"/> Brucella Species                  | <input type="checkbox"/> Helicobacter pylori                         | <input type="checkbox"/> Mycoplasma pneumoniae (Antibiotic Guide)        |
| <input type="checkbox"/> Burkholderia cepacia              | <input type="checkbox"/> Klebsiella granulomatis (Antibiotic Guide)  | <input type="checkbox"/> Neisseria gonorrhoeae                           |
| <input type="checkbox"/> Burkholderia mallei               | <input type="checkbox"/> Klebsiella species                          | <input type="checkbox"/> Neisseria meningitidis                          |
| <input type="checkbox"/> Burkholderia pseudomallei         | <input type="checkbox"/> ESBL Klebsiella pneumoniae                  | <input type="checkbox"/> Nocardia                                        |
| <input type="checkbox"/> Campylobacter and related species | <input type="checkbox"/> Lactobacillus                               | <input type="checkbox"/> Other atypical mycobacteria                     |
| <input type="checkbox"/> Campylobacter jejuni              | <input type="checkbox"/> Legionella pneumophila                      | <input type="checkbox"/> Pasteurella multocida                           |
| <input type="checkbox"/> Capnocytophaga canimorsus         | <input type="checkbox"/> Legionella species                          | <input type="checkbox"/> Peptostreptococcus/Peptococcus                  |
| <input type="checkbox"/> Chlamydia trachomatis             | <input type="checkbox"/> Leptospira interrogans                      | <input type="checkbox"/> Plesiomonas                                     |
| <input type="checkbox"/> Chlamydophila pneumoniae          | <input type="checkbox"/> Listeria monocytogenes                      | <input type="checkbox"/> Propionibacterium species                       |
| <input type="checkbox"/> Chlamydophila psittaci            | <input type="checkbox"/> Lymphogranuloma venereum (LGV)              | <input type="checkbox"/> Proteus species                                 |
| <input type="checkbox"/> Citrobacter species               | <input type="checkbox"/> Methicillin Resistant Staphylococcus aureus | <input type="checkbox"/> Providencia                                     |
| <input type="checkbox"/> Clostridium botulinum             | <input type="checkbox"/> Moraxella catarrhalis                       | <input type="checkbox"/> Pseudomonas aeruginosa                          |
| <input type="checkbox"/> Clostridium difficile             | <input type="checkbox"/> Morganella                                  |                                                                          |
| <input type="checkbox"/> Clostridium species               | <input type="checkbox"/> Mycobacterium abscessus                     |                                                                          |
| <input type="checkbox"/> Clostridium tetani (Tetanus)      |                                                                      |                                                                          |
| <input type="checkbox"/> Corynebacterium diphtheriae       |                                                                      |                                                                          |

- |                                                            |                                                                     |                                                  |
|------------------------------------------------------------|---------------------------------------------------------------------|--------------------------------------------------|
| <input type="checkbox"/> Rhodococcus equi                  | <input type="checkbox"/> Vancomycin Resistant Enterococcus species  | <input type="checkbox"/> Candida tropicalis      |
| <input type="checkbox"/> Rickettsia rickettsii             | <input type="checkbox"/> Vancomycin Resistant Staphylococcus aureus | <input type="checkbox"/> Chromomycosis           |
| <input type="checkbox"/> Rickettsia species                | <input type="checkbox"/> Vibrio cholerae                            | <input type="checkbox"/> Coccidioides immitis    |
| <input type="checkbox"/> Salmonella species                | <input type="checkbox"/> Vibrio species (noncholera)                | <input type="checkbox"/> Cryptococcus neoformans |
| <input type="checkbox"/> Serratia species                  | <input type="checkbox"/> Yersinia pestis                            | <input type="checkbox"/> Cunninghamella          |
| <input type="checkbox"/> Shigella dysenteriae              | <input type="checkbox"/> Yersinia species (non-plague)              | <input type="checkbox"/> Dermatophytes           |
| <input type="checkbox"/> Shigella species                  | <input type="checkbox"/> Absidia                                    | <input type="checkbox"/> Fusarium                |
| <input type="checkbox"/> Staphylococci, coagulase negative | <input type="checkbox"/> Aspergillus                                | <input type="checkbox"/> Histoplasma capsulatum  |
| <input type="checkbox"/> Staphylococcus aureus             | <input type="checkbox"/> Basidiobolomycosis                         | <input type="checkbox"/> Mucor                   |
| <input type="checkbox"/> Stenotrophomonas maltophilia      | <input type="checkbox"/> Blastomyces dermatitidis                   | <input type="checkbox"/> Mycetoma                |
| <input type="checkbox"/> Streptobacillus moniliformis      | <input type="checkbox"/> Candida albicans                           | <input type="checkbox"/> Pneumocystis carinii    |
| <input type="checkbox"/> Streptococcus pneumoniae          | <input type="checkbox"/> Candida glabrata                           | <input type="checkbox"/> Pneumocystis jirovecii  |
| <input type="checkbox"/> Streptococcus pyogenes (Group A)  | <input type="checkbox"/> Candida guilliermondii                     | <input type="checkbox"/> Pseudallescheria boydii |
| <input type="checkbox"/> Streptococcus species             | <input type="checkbox"/> Candida krusei                             | <input type="checkbox"/> Rhizomucor              |
| <input type="checkbox"/> Treponema pallidum (syphilis)     | <input type="checkbox"/> Candida lusitanae                          | <input type="checkbox"/> Rhizopus                |
| <input type="checkbox"/> Tropheryma whipplei               | <input type="checkbox"/> Candida parapsilosis                       | <input type="checkbox"/> Saksanea                |
|                                                            | <input type="checkbox"/> Candida species                            | <input type="checkbox"/> Sporothrix schenckii    |
|                                                            |                                                                     | <input type="checkbox"/> Zygomycetes             |

#### 4.55 HAEMORRHAGIC COMPLICATION 1:

'Full' daily data collection: Haemorrhagic complications diagnosed **in the last 24 hours**

'Basic' daily data collection: Haemorrhagic complications diagnosed **since the last EOT Daily form**

- If this is the **'Four days after ICU admission'** timepoint, please answer with reference to the last 24 hours

- Yes  
 No

#### 4.56 SOURCE OF HAEMORRHAGIC COMPLICATION 1:

- |                                                 |                                                  |
|-------------------------------------------------|--------------------------------------------------|
| <input type="checkbox"/> Lungs                  | <input type="checkbox"/> Osteoarticular and bone |
| <input type="checkbox"/> Gastro-intestinal      | <input type="checkbox"/> Cardiac                 |
| <input type="checkbox"/> Genito-urinary         | <input type="checkbox"/> Bloodstream             |
| <input type="checkbox"/> Skin and soft tissue   | <input type="checkbox"/> Not known               |
| <input type="checkbox"/> Central nervous system |                                                  |

#### 4.57 HAEMORRHAGIC COMPLICATION 2:

'Full' daily data collection: Haemorrhagic complications diagnosed **in the last 24 hours**

'Basic' daily data collection: Haemorrhagic complications diagnosed **since the last EOT Daily form**

- If this is the **'Four days after ICU admission'** timepoint, please answer with reference to the last 24 hours

- Yes  
 No

#### 4.58 SOURCE OF HAEMORRHAGIC COMPLICATION 2:

- |                                            |                                                  |                                      |
|--------------------------------------------|--------------------------------------------------|--------------------------------------|
| <input type="checkbox"/> Lungs             | <input type="checkbox"/> Skin and soft tissue    | <input type="checkbox"/> Cardiac     |
| <input type="checkbox"/> Gastro-intestinal | <input type="checkbox"/> Central nervous system  | <input type="checkbox"/> Bloodstream |
| <input type="checkbox"/> Genito-urinary    | <input type="checkbox"/> Osteoarticular and bone | <input type="checkbox"/> Not known   |

#### 4.59 OTHER NON-HAEMORRHAGIC COMPLICATION:

'Full' daily data collection: Haemorrhagic complications diagnosed **in the last 24 hours**

'Basic' daily data collection: Haemorrhagic complications diagnosed **since the last EOT Daily form**

- If this is the 'Four days after ICU admission' timepoint, please answer with reference to the last 24 hours

\_\_\_\_\_ (TEXT)

#### 4.60 Troponin in the last 24 hours:

- Troponin T: \_\_\_\_\_ ( ng/mL  ng/L)
- Troponin I: \_\_\_\_\_ ( ng/mL  ng/L)

*If this data has already been entered in the 'Daily Case Report Form – Laboratory Results' section of the ISARIC CRF, please DO NOT re-enter the data here. Please leave '4.59 Troponin I' blank.*

- High sensitivity troponin T: \_\_\_\_\_ ( ng/mL  ng/L)
- High sensitivity troponin I: \_\_\_\_\_ ( ng/mL  ng/L)
- Not available

#### 4.61 Cardiac BNP in the last 24 hours: \_\_\_\_\_ (picograms/mL) ONLY NUMBERS BETWEEN 0-1000

- Not available

## CORE CASE RECORD FORM (EOT Final)

### 5 OUTCOMES

5.1 DATE OF ECMO DISCONTINUATION: \_\_\_\_ / \_\_\_\_ / \_\_\_\_

5.2 DATE OF INVASIVE MECHANICAL VENTILATION DISCONTINUATION: \_\_\_\_ / \_\_\_\_ / \_\_\_\_

5.3 DATE OF ICU DISCHARGE: \_\_\_\_ / \_\_\_\_ / \_\_\_\_

5.4 DATE OF HOSPITAL DISCHARGE: \_\_\_\_ / \_\_\_\_ / \_\_\_\_

5.5 DATE OF DEATH: \_\_\_\_ / \_\_\_\_ / \_\_\_\_  Not applicable

#### 5.6 SITE OF DEATH

- ICU
- HOSPITAL
- OUTSIDE HOSPITAL
- Not applicable

#### 5.7 MAIN CAUSE OF ICU DEATH

- Respiratory Failure
- Cardiac Failure
- Liver Failure
- Cerebrovascular accident
- Septic shock
- Haemorrhagic shock
- Other
- Not applicable

#### 5.8 ALIVE AT 28 DAYS POST ICU ADMISSION?

- Yes
- No

#### 5.9 FINAL ASSESSMENT NOTES

---

---

5.10 At any time post-ICU admission and until ICU discharge, did the patient present new cutaneous manifestations?

- Yes
- No
- Not available

If yes to 5.10, type of cutaneous manifestations (please select up to three (3) options)

- Bullae

- Macules
- Nodules
- Papules
- Plaques
- Purpura
- Pustules
- Rash
- Scale
- Urticaria
- Vesicles
- Other: \_\_\_\_\_

**If yes to 5.10, specify the involved regions (please select up to three (3) options):**

- Face
- Trunk
- Upper limbs
- Hands
- Lower limbs
- Feet

**5.11 At any time post ICU admission and until ICU discharge, did the patient have a stroke?**

- Yes
- No
- Not available

**If yes to 5.11, type of stroke (please select up to two (2) options)**

- Ischemic stroke
- Intraparenchymal haemorrhage
- Subarachnoid haemorrhage
- Hypoxic ischemic brain injury/anoxic brain injury
- Cerebral venous sinus thrombosis
- Other
- Unknown

**If yes to 5.11, side of stroke (please select only one)**

- Right side
- Left side
- Multifocal
- Unknown
